# Supplementary material for: Cell-type specific innervation of cortical pyramidal cells at their apical dendrites
Source: eLife. 2020 Feb 28;9:e46876. doi: 10.7554/eLife.46876 (PMC7297530; doi:10.7554/eLife.46876)
Supplement: Figure 1—source data 1. [file elife-46876-fig1-data1.xlsx]

## Sheet: S1_layer2
treeIndex	putative inhibitory	Excitatory
layer2ApicalDendrite01	0.516086	1.21796
layer2ApicalDendrite02	0.494756	1.06867
layer2ApicalDendrite03	0.450592	0.28162
layer2ApicalDendrite04	0.27867	0.329338
layer2ApicalDendrite05	0.325751	1.45335
layer2ApicalDendrite06	0.573027	0.229211
layer2ApicalDendrite07	0.341499	1.0245
layer2ApicalDendrite08	0.332693	0.731925
layer2ApicalDendrite09	0.71872	0.301399
layer2ApicalDendrite10	0.399247	0.634098

## Sheet: S1_deepLayer
treeIndex	putative inhibitory	Excitatory
deepLayerApicalDendrite01	0.379777	3.82698
deepLayerApicalDendrite02	0.190984	3.38314
deepLayerApicalDendrite03	0.148133	4.14774
deepLayerApicalDendrite04	0.227758	3.56821
deepLayerApicalDendrite05	0.441394	3.06033
deepLayerApicalDendrite06	0.464755	3.16615
deepLayerApicalDendrite07	0.420714	3.63617
deepLayerApicalDendrite08	0.0620256	1.05444
deepLayerApicalDendrite09	0.448713	4.23473
deepLayerApicalDendrite10	0.244496	1.13079

## Sheet: V2_layer2
treeIndex	putative inhibitory	Excitatory
layer2ApicalDendrite01	0.368432	2.24744
layer2ApicalDendrite02	0.297596	2.38076
layer2ApicalDendrite03	0.196827	0.836515
layer2ApicalDendrite04	0.5328	0.583543
layer2ApicalDendrite05	0.35447	2.06237
layer2ApicalDendrite06	0.338951	1.67935
layer2ApicalDendrite07	0.459137	0.43618
layer2ApicalDendrite08	0.328559	0.963772
layer2ApicalDendrite09	0.20487	1.74139
layer2ApicalDendrite10	0.241122	1.07166

## Sheet: V2_deepLayer
treeIndex	putative inhibitory	Excitatory
deepLayerApicalDendrite01	0.217541	0.652623
deepLayerApicalDendrite02	0.272604	1.68106
deepLayerApicalDendrite03	0.13697	3.50644
deepLayerApicalDendrite04	0.113665	1.13665
deepLayerApicalDendrite05	0.104963	2.28295
deepLayerApicalDendrite06	0.37092	1.28395
deepLayerApicalDendrite07	0.261181	2.37965
deepLayerApicalDendrite08	0.195066	2.1736
deepLayerApicalDendrite09	0.114037	1.79608
deepLayerApicalDendrite10	0.114525	1.43157

## Sheet: PPC_layer2
treeIndex	putative inhibitory	Excitatory
layer2ApicalDendrite01	0.342683	0.736769
layer2ApicalDendrite02	0.404984	0.632787
layer2ApicalDendrite03	0.406329	0.528227
layer2ApicalDendrite04	0.458203	0.933377
layer2ApicalDendrite05	0.574948	0.718684
layer2ApicalDendrite06	0.267004	2.56324
layer2ApicalDendrite07	0.534758	2.11357
layer2ApicalDendrite08	0.287616	2.06561
layer2ApicalDendrite09	0.311338	1.98124
layer2ApicalDendrite10	0.42308	1.25001

## Sheet: PPC_deepLayer
treeIndex	putative inhibitory	Excitatory
deepLayerApicalDendrite01	0.0856177	1.25573
deepLayerApicalDendrite02	0.242125	2.31364
deepLayerApicalDendrite03	0.111634	1.28379
deepLayerApicalDendrite04	0.21697	2.87486
deepLayerApicalDendrite05	0.372754	4.2068
deepLayerApicalDendrite06	0.501453	1.78294
deepLayerApicalDendrite07	0.220036	1.67778
deepLayerApicalDendrite08	0.0273899	1.15037
deepLayerApicalDendrite09	0.310987	2.06382
deepLayerApicalDendrite10	0.425053	2.73628

## Sheet: ACC_layer2
treeIndex	putative inhibitory	Excitatory
layer2ApicalDendrite01	0.401863	0.321491
layer2ApicalDendrite02	0.322817	0.839324
layer2ApicalDendrite03	0.784624	1.45037
layer2ApicalDendrite04	0.553397	0.276698
layer2ApicalDendrite05	0.462217	1.19756
layer2ApicalDendrite06	0.462437	0.739899
layer2ApicalDendrite07	0.679366	0.504046
layer2ApicalDendrite08	0.300591	2.00394
layer2ApicalDendrite09	0.477068	1.12111
layer2ApicalDendrite10	0.74513	1.3104
layer2ApicalDendrite11	0.476371	0.247007

## Sheet: ACC_deepLayer
treeIndex	putative inhibitory	Excitatory
deepLayerApicalDendrite01	0.124214	1.39119
deepLayerApicalDendrite02	0.173917	1.39134
deepLayerApicalDendrite03	0.194113	2.07979
deepLayerApicalDendrite04	0.105919	1.35047
deepLayerApicalDendrite05	0.287421	1.66704
deepLayerApicalDendrite06	0.182927	1.34147
deepLayerApicalDendrite07	0.107156	2.67889
deepLayerApicalDendrite08	0.102284	1.30412
deepLayerApicalDendrite09	0.0778601	1.40148
deepLayerApicalDendrite10	0.246814	1.50557
deepLayerApicalDendrite11	0.15094	1.53455

## Sheet: Aggregate_layer2
treeIndex	putative inhibitory	Excitatory
layer2ApicalDendrite01	0.516086	1.21796
layer2ApicalDendrite02	0.494756	1.06867
layer2ApicalDendrite03	0.450592	0.28162
layer2ApicalDendrite04	0.27867	0.329338
layer2ApicalDendrite05	0.325751	1.45335
layer2ApicalDendrite06	0.573027	0.229211
layer2ApicalDendrite07	0.341499	1.0245
layer2ApicalDendrite08	0.332693	0.731925
layer2ApicalDendrite09	0.71872	0.301399
layer2ApicalDendrite10	0.399247	0.634098
layer2ApicalDendrite01	0.368432	2.24744
layer2ApicalDendrite02	0.297596	2.38076
layer2ApicalDendrite03	0.196827	0.836515
layer2ApicalDendrite04	0.5328	0.583543
layer2ApicalDendrite05	0.35447	2.06237
layer2ApicalDendrite06	0.338951	1.67935
layer2ApicalDendrite07	0.459137	0.43618
layer2ApicalDendrite08	0.328559	0.963772
layer2ApicalDendrite09	0.20487	1.74139
layer2ApicalDendrite10	0.241122	1.07166
layer2ApicalDendrite01	0.342683	0.736769
layer2ApicalDendrite02	0.404984	0.632787
layer2ApicalDendrite03	0.406329	0.528227
layer2ApicalDendrite04	0.458203	0.933377
layer2ApicalDendrite05	0.574948	0.718684
layer2ApicalDendrite06	0.267004	2.56324
layer2ApicalDendrite07	0.534758	2.11357
layer2ApicalDendrite08	0.287616	2.06561
layer2ApicalDendrite09	0.311338	1.98124
layer2ApicalDendrite10	0.42308	1.25001
layer2ApicalDendrite01	0.401863	0.321491
layer2ApicalDendrite02	0.322817	0.839324
layer2ApicalDendrite03	0.784624	1.45037
layer2ApicalDendrite04	0.553397	0.276698
layer2ApicalDendrite05	0.462217	1.19756
layer2ApicalDendrite06	0.462437	0.739899
layer2ApicalDendrite07	0.679366	0.504046
layer2ApicalDendrite08	0.300591	2.00394
layer2ApicalDendrite09	0.477068	1.12111
layer2ApicalDendrite10	0.74513	1.3104
layer2ApicalDendrite11	0.476371	0.247007

## Sheet: Aggregate_deepLayer
treeIndex	putative inhibitory	Excitatory
deepLayerApicalDendrite01	0.379777	3.82698
deepLayerApicalDendrite02	0.190984	3.38314
deepLayerApicalDendrite03	0.148133	4.14774
deepLayerApicalDendrite04	0.227758	3.56821
deepLayerApicalDendrite05	0.441394	3.06033
deepLayerApicalDendrite06	0.464755	3.16615
deepLayerApicalDendrite07	0.420714	3.63617
deepLayerApicalDendrite08	0.0620256	1.05444
deepLayerApicalDendrite09	0.448713	4.23473
deepLayerApicalDendrite10	0.244496	1.13079
deepLayerApicalDendrite01	0.217541	0.652623
deepLayerApicalDendrite02	0.272604	1.68106
deepLayerApicalDendrite03	0.13697	3.50644
deepLayerApicalDendrite04	0.113665	1.13665
deepLayerApicalDendrite05	0.104963	2.28295
deepLayerApicalDendrite06	0.37092	1.28395
deepLayerApicalDendrite07	0.261181	2.37965
deepLayerApicalDendrite08	0.195066	2.1736
deepLayerApicalDendrite09	0.114037	1.79608
deepLayerApicalDendrite10	0.114525	1.43157
deepLayerApicalDendrite01	0.0856177	1.25573
deepLayerApicalDendrite02	0.242125	2.31364
deepLayerApicalDendrite03	0.111634	1.28379
deepLayerApicalDendrite04	0.21697	2.87486
deepLayerApicalDendrite05	0.372754	4.2068
deepLayerApicalDendrite06	0.501453	1.78294
deepLayerApicalDendrite07	0.220036	1.67778
deepLayerApicalDendrite08	0.0273899	1.15037
deepLayerApicalDendrite09	0.310987	2.06382
deepLayerApicalDendrite10	0.425053	2.73628
deepLayerApicalDendrite01	0.124214	1.39119
deepLayerApicalDendrite02	0.173917	1.39134
deepLayerApicalDendrite03	0.194113	2.07979
deepLayerApicalDendrite04	0.105919	1.35047
deepLayerApicalDendrite05	0.287421	1.66704
deepLayerApicalDendrite06	0.182927	1.34147
deepLayerApicalDendrite07	0.107156	2.67889
deepLayerApicalDendrite08	0.102284	1.30412
deepLayerApicalDendrite09	0.0778601	1.40148
deepLayerApicalDendrite10	0.246814	1.50557
deepLayerApicalDendrite11	0.15094	1.53455
