# Supplementary material for: Cell-type specific innervation of cortical pyramidal cells at their apical dendrites
Source: eLife. 2020 Feb 28;9:e46876. doi: 10.7554/eLife.46876 (PMC7297530; doi:10.7554/eLife.46876)
Supplement: Figure 1—source data 2. [file elife-46876-fig1-data2.xlsx]

## Sheet: S1_layer2
treeIndex	putative inhibitory	Excitatory
layer2ApicalDendrite01	0.297619	0.702381
layer2ApicalDendrite02	0.316456	0.683544
layer2ApicalDendrite03	0.615385	0.384615
layer2ApicalDendrite04	0.458333	0.541667
layer2ApicalDendrite05	0.183099	0.816901
layer2ApicalDendrite06	0.714286	0.285714
layer2ApicalDendrite07	0.25	0.75
layer2ApicalDendrite08	0.3125	0.6875
layer2ApicalDendrite09	0.704545	0.295455
layer2ApicalDendrite10	0.386364	0.613636

## Sheet: S1_deepLayer
treeIndex	putative inhibitory	Excitatory
deepLayerApicalDendrite01	0.0902778	0.909722
deepLayerApicalDendrite02	0.0534351	0.946565
deepLayerApicalDendrite03	0.0344828	0.965517
deepLayerApicalDendrite04	0.06	0.94
deepLayerApicalDendrite05	0.12605	0.87395
deepLayerApicalDendrite06	0.128	0.872
deepLayerApicalDendrite07	0.103704	0.896296
deepLayerApicalDendrite08	0.0555556	0.944444
deepLayerApicalDendrite09	0.0958084	0.904192
deepLayerApicalDendrite10	0.177778	0.822222

## Sheet: V2_layer2
treeIndex	putative inhibitory	Excitatory
layer2ApicalDendrite01	0.140845	0.859155
layer2ApicalDendrite02	0.111111	0.888889
layer2ApicalDendrite03	0.190476	0.809524
layer2ApicalDendrite04	0.477273	0.522727
layer2ApicalDendrite05	0.146667	0.853333
layer2ApicalDendrite06	0.167939	0.832061
layer2ApicalDendrite07	0.512821	0.487179
layer2ApicalDendrite08	0.254237	0.745763
layer2ApicalDendrite09	0.105263	0.894737
layer2ApicalDendrite10	0.183673	0.816327

## Sheet: V2_deepLayer
treeIndex	putative inhibitory	Excitatory
deepLayerApicalDendrite01	0.25	0.75
deepLayerApicalDendrite02	0.139535	0.860465
deepLayerApicalDendrite03	0.037594	0.962406
deepLayerApicalDendrite04	0.0909091	0.909091
deepLayerApicalDendrite05	0.043956	0.956044
deepLayerApicalDendrite06	0.224138	0.775862
deepLayerApicalDendrite07	0.0989011	0.901099
deepLayerApicalDendrite08	0.0823529	0.917647
deepLayerApicalDendrite09	0.0597015	0.940299
deepLayerApicalDendrite10	0.0740741	0.925926

## Sheet: PPC_layer2
treeIndex	putative inhibitory	Excitatory
layer2ApicalDendrite01	0.31746	0.68254
layer2ApicalDendrite02	0.390244	0.609756
layer2ApicalDendrite03	0.434783	0.565217
layer2ApicalDendrite04	0.329268	0.670732
layer2ApicalDendrite05	0.444444	0.555556
layer2ApicalDendrite06	0.0943396	0.90566
layer2ApicalDendrite07	0.201923	0.798077
layer2ApicalDendrite08	0.122222	0.877778
layer2ApicalDendrite09	0.135802	0.864198
layer2ApicalDendrite10	0.252874	0.747126

## Sheet: PPC_deepLayer
treeIndex	putative inhibitory	Excitatory
deepLayerApicalDendrite01	0.0638298	0.93617
deepLayerApicalDendrite02	0.0947368	0.905263
deepLayerApicalDendrite03	0.08	0.92
deepLayerApicalDendrite04	0.0701754	0.929825
deepLayerApicalDendrite05	0.0813953	0.918605
deepLayerApicalDendrite06	0.219512	0.780488
deepLayerApicalDendrite07	0.115942	0.884058
deepLayerApicalDendrite08	0.0232558	0.976744
deepLayerApicalDendrite09	0.130952	0.869048
deepLayerApicalDendrite10	0.134454	0.865546

## Sheet: ACC_layer2
treeIndex	putative inhibitory	Excitatory
layer2ApicalDendrite01	0.555556	0.444444
layer2ApicalDendrite02	0.277778	0.722222
layer2ApicalDendrite03	0.351064	0.648936
layer2ApicalDendrite04	0.666667	0.333333
layer2ApicalDendrite05	0.278481	0.721519
layer2ApicalDendrite06	0.384615	0.615385
layer2ApicalDendrite07	0.574074	0.425926
layer2ApicalDendrite08	0.130435	0.869565
layer2ApicalDendrite09	0.298507	0.701493
layer2ApicalDendrite10	0.3625	0.6375
layer2ApicalDendrite11	0.658537	0.341463

## Sheet: ACC_deepLayer
treeIndex	putative inhibitory	Excitatory
deepLayerApicalDendrite01	0.0819672	0.918033
deepLayerApicalDendrite02	0.111111	0.888889
deepLayerApicalDendrite03	0.0853659	0.914634
deepLayerApicalDendrite04	0.0727273	0.927273
deepLayerApicalDendrite05	0.147059	0.852941
deepLayerApicalDendrite06	0.12	0.88
deepLayerApicalDendrite07	0.0384615	0.961538
deepLayerApicalDendrite08	0.0727273	0.927273
deepLayerApicalDendrite09	0.0526316	0.947368
deepLayerApicalDendrite10	0.140845	0.859155
deepLayerApicalDendrite11	0.0895522	0.910448

## Sheet: Aggregate_layer2
treeIndex	putative inhibitory	Excitatory
layer2ApicalDendrite01	0.297619	0.702381
layer2ApicalDendrite02	0.316456	0.683544
layer2ApicalDendrite03	0.615385	0.384615
layer2ApicalDendrite04	0.458333	0.541667
layer2ApicalDendrite05	0.183099	0.816901
layer2ApicalDendrite06	0.714286	0.285714
layer2ApicalDendrite07	0.25	0.75
layer2ApicalDendrite08	0.3125	0.6875
layer2ApicalDendrite09	0.704545	0.295455
layer2ApicalDendrite10	0.386364	0.613636
layer2ApicalDendrite01	0.140845	0.859155
layer2ApicalDendrite02	0.111111	0.888889
layer2ApicalDendrite03	0.190476	0.809524
layer2ApicalDendrite04	0.477273	0.522727
layer2ApicalDendrite05	0.146667	0.853333
layer2ApicalDendrite06	0.167939	0.832061
layer2ApicalDendrite07	0.512821	0.487179
layer2ApicalDendrite08	0.254237	0.745763
layer2ApicalDendrite09	0.105263	0.894737
layer2ApicalDendrite10	0.183673	0.816327
layer2ApicalDendrite01	0.31746	0.68254
layer2ApicalDendrite02	0.390244	0.609756
layer2ApicalDendrite03	0.434783	0.565217
layer2ApicalDendrite04	0.329268	0.670732
layer2ApicalDendrite05	0.444444	0.555556
layer2ApicalDendrite06	0.0943396	0.90566
layer2ApicalDendrite07	0.201923	0.798077
layer2ApicalDendrite08	0.122222	0.877778
layer2ApicalDendrite09	0.135802	0.864198
layer2ApicalDendrite10	0.252874	0.747126
layer2ApicalDendrite01	0.555556	0.444444
layer2ApicalDendrite02	0.277778	0.722222
layer2ApicalDendrite03	0.351064	0.648936
layer2ApicalDendrite04	0.666667	0.333333
layer2ApicalDendrite05	0.278481	0.721519
layer2ApicalDendrite06	0.384615	0.615385
layer2ApicalDendrite07	0.574074	0.425926
layer2ApicalDendrite08	0.130435	0.869565
layer2ApicalDendrite09	0.298507	0.701493
layer2ApicalDendrite10	0.3625	0.6375
layer2ApicalDendrite11	0.658537	0.341463

## Sheet: Aggregate_deepLayer
treeIndex	putative inhibitory	Excitatory
deepLayerApicalDendrite01	0.0902778	0.909722
deepLayerApicalDendrite02	0.0534351	0.946565
deepLayerApicalDendrite03	0.0344828	0.965517
deepLayerApicalDendrite04	0.06	0.94
deepLayerApicalDendrite05	0.12605	0.87395
deepLayerApicalDendrite06	0.128	0.872
deepLayerApicalDendrite07	0.103704	0.896296
deepLayerApicalDendrite08	0.0555556	0.944444
deepLayerApicalDendrite09	0.0958084	0.904192
deepLayerApicalDendrite10	0.177778	0.822222
deepLayerApicalDendrite01	0.25	0.75
deepLayerApicalDendrite02	0.139535	0.860465
deepLayerApicalDendrite03	0.037594	0.962406
deepLayerApicalDendrite04	0.0909091	0.909091
deepLayerApicalDendrite05	0.043956	0.956044
deepLayerApicalDendrite06	0.224138	0.775862
deepLayerApicalDendrite07	0.0989011	0.901099
deepLayerApicalDendrite08	0.0823529	0.917647
deepLayerApicalDendrite09	0.0597015	0.940299
deepLayerApicalDendrite10	0.0740741	0.925926
deepLayerApicalDendrite01	0.0638298	0.93617
deepLayerApicalDendrite02	0.0947368	0.905263
deepLayerApicalDendrite03	0.08	0.92
deepLayerApicalDendrite04	0.0701754	0.929825
deepLayerApicalDendrite05	0.0813953	0.918605
deepLayerApicalDendrite06	0.219512	0.780488
deepLayerApicalDendrite07	0.115942	0.884058
deepLayerApicalDendrite08	0.0232558	0.976744
deepLayerApicalDendrite09	0.130952	0.869048
deepLayerApicalDendrite10	0.134454	0.865546
deepLayerApicalDendrite01	0.0819672	0.918033
deepLayerApicalDendrite02	0.111111	0.888889
deepLayerApicalDendrite03	0.0853659	0.914634
deepLayerApicalDendrite04	0.0727273	0.927273
deepLayerApicalDendrite05	0.147059	0.852941
deepLayerApicalDendrite06	0.12	0.88
deepLayerApicalDendrite07	0.0384615	0.961538
deepLayerApicalDendrite08	0.0727273	0.927273
deepLayerApicalDendrite09	0.0526316	0.947368
deepLayerApicalDendrite10	0.140845	0.859155
deepLayerApicalDendrite11	0.0895522	0.910448
