# Supplementary material for: Cell-type specific innervation of cortical pyramidal cells at their apical dendrites
Source: eLife. 2020 Feb 28;9:e46876. doi: 10.7554/eLife.46876 (PMC7297530; doi:10.7554/eLife.46876)
Supplement: Figure 2—source data 2. [file elife-46876-fig2-data2.xlsx]

## Sheet: L1
Row	Shaft	Spine
L2	85.7143	100
L3	96.2963	100
L5tt	77.5	93.3333
L5st	40

## Sheet: L2
Row	Shaft	Spine
L2	100	97.1429
Deep	98.9011	98.3607
L5st	55.5556
