# Supplementary material for: Cell-type specific innervation of cortical pyramidal cells at their apical dendrites
Source: eLife. 2020 Feb 28;9:e46876. doi: 10.7554/eLife.46876 (PMC7297530; doi:10.7554/eLife.46876)
Supplement: Figure 2—source data 3. [file elife-46876-fig2-data3.xlsx]

## Sheet: Spine_layer2AD
0.0617507
0.16147
0.352606
0.117302
0.0944707
0.0958538
0.0650911
0.507903
0.122949
0.252899
0.117197
0.146067
0.120351
0.135887
0.184622
0.195226
0.101139
0.1161
0.0895469
0.206243
0.0384524
0.17302
0.0814188
0.072841
0.306634
0.0844738
0.214605
0.157851
0.193757
0.184433
0.0364798
0.0869461
0.0666262
0.358559
0.094927
0.297316
0.139709
0.101368
0.296238
0.135565
0.128925

## Sheet: Spine_deepLayerAD
0.10122
0.159049
0.0612557
0.0956477
0.0278901
0.665994
0.0746293
0.0902702
0.0885418
0.105206
0.621624
0.673535
0.138456
0.304042
0.573954
1.13989
0.323421
0.297733
0.523501
0.487407
0.172418
0.12334
0.20406
0.127443
0.141385
0.040241
0.222585
0.0991051
0.125229
0.0980572
0.361526
0.212863
0.141443
0.499736
0.0787699
0.0498431
0.151267
0.0779246
0.299587
0.216075
0.987688

## Sheet: Shaft_layer2AD
0.247488
0.575037
0.228674
1.79552
0.986596
0.905226
1.33754
1.58906
0.39111
0.262154
0.837468
0.31961
0.561469
1.16089
1.43277
0.538024
0.795349
0.511973
0.676865
0.657204
0.7368
0.254128
0.297601
0.471513
0.442697
0.260939
0.475732
0.53407
1.35489
0.271934
1.2712
0.506666
0.584794
0.519146
0.468704
1.59766
0.620907
0.623235
0.403783
0.546883
0.319068

## Sheet: Shaft_deepLayerAD
0.339787
0.914314
1.25723
0.677417
0.673513
0.238793
0.456518
0.964298
0.47258
0.165364
0.195858
0.984433
0.278561
0.410113
0.211695
0.0826129
0.311305
0.34908
0.213077
0.506888
0.269777
0.320998
0.464681
1.33307
0.59218
0.265641
0.595337
0.349091
0.767863
0.214369
0.869516
0.988284
0.182868
0.485801
0.269348
0.234221
0.541795
0.155614
0.556828
0.493166
1.1697
