# Supplementary material for: Cell-type specific innervation of cortical pyramidal cells at their apical dendrites
Source: eLife. 2020 Feb 28;9:e46876. doi: 10.7554/eLife.46876 (PMC7297530; doi:10.7554/eLife.46876)
Supplement: Figure 2—source data 4. [file elife-46876-fig2-data4.xlsx]

## Sheet: FractionDouble_layer2AD
0.0169492
0.0555556
0
0
0.0172414
0.125
0.0444444
0.0606061
0
0
0.0655738
0.0568182
0.0294118
0.130435
0
0.0642202
0.105263
0.0454545
0
0.025
0.0232558
0.08
0.0769231
0.0545455
0.2
0.0625
0.0481928
0
0.0285714
0.0769231
0.166667
0.0769231
0.131148
0.153846
0.0526316
0.0625
0.130435
0.0333333
0.0425532
0.215686
0.0714286

## Sheet: FractionDouble_deepLayerAD
0.0305344
0.00806452
0.0142857
0.0141844
0.0673077
0.0917431
0.0413223
0
0.0529801
0.0540541
0.047619
0.0405405
0.0078125
0.025
0.0229885
0.0888889
0.0243902
0.025641
0.015873
0.04
0.0227273
0
0.0434783
0.00943396
0.0632911
0.03125
0.0327869
0
0.0136986
0.0679612
0.0178571
0.0625
0.04
0.0196078
0.103448
0.0454545
0.02
0.0196078
0.0138889
0.0819672
0.0327869
