# Supplementary material for: Cell-type specific innervation of cortical pyramidal cells at their apical dendrites
Source: eLife. 2020 Feb 28;9:e46876. doi: 10.7554/eLife.46876 (PMC7297530; doi:10.7554/eLife.46876)
Supplement: Figure 2—source data 5. [file elife-46876-fig2-data5.xlsx]

## Sheet: apicalDiameter_L2
1.825
2.06429
2.62
1.80769
2.26923
2.49
1.59286
1.96429
2.86923
2.025
2.0375
1.97
1.8
2.17
2.08
1.60824
2.03583
1.80923
1.68
1.39
2.11118
1.78
2.17143
1.71538
2.53
2.22
2.27
1.89
1.87
1.68538
3.03
2.22143
2.54545
2.49231
2.25
2.44
3.125
1.98333
2.34545
2.49
3.12143

## Sheet: apicalDiameter_DL
1.85
1.82
1.74
1.56154
2.11
2.04
2.01
1.78571
1.84545
1.76
1.97
1.705
2.11
1.4
1.49182
1.92
2.22
1.66
1.5
1.595
1.46
1.79091
1.73
1.92
2.2
2.58
1.61
1.61
1.87
1.93
1.57
1.66
1.87
1.32727
1.325
1.7
1.71
1.94
1.92105
1.63
1.43

## Sheet: inhSurfDensity_L2
0.0900139
0.0762919
0.0547434
0.0490701
0.0456938
0.0732531
0.0682438
0.0540466
0.0797341
0.0627576
0.0575586
0.0480851
0.0348067
0.0781546
0.0542457
0.0670868
0.0717877
0.0578055
0.0388167
0.0590732
0.0516676
0.0724215
0.0595638
0.0850251
0.0723366
0.0382839
0.0749863
0.0484397
0.0529957
0.0799049
0.0422168
0.0462566
0.0981175
0.0706781
0.0653904
0.0603271
0.0691997
0.0482426
0.0647445
0.095254
0.0485782

## Sheet: inhSurfDensity_DL
0.0653442
0.0334022
0.027099
0.046427
0.0665878
0.0725177
0.0666257
0.0110563
0.0773954
0.044219
0.03515
0.050893
0.020663
0.0258433
0.022396
0.0614935
0.0374488
0.0374045
0.0241993
0.0228555
0.0186664
0.0430345
0.02054
0.0359707
0.0539324
0.0618672
0.0435029
0.00541519
0.0529359
0.0701029
0.0251837
0.0333491
0.0330418
0.0254018
0.0690483
0.0342515
0.0199466
0.0167824
0.0129011
0.053384
0.0335983

## Sheet: excSurfDensity_L2
0.212433
0.16479
0.0342146
0.0579919
0.203865
0.0293012
0.204731
0.118903
0.0334369
0.0996739
0.351108
0.384681
0.147928
0.0855979
0.315612
0.332385
0.0681984
0.169563
0.329942
0.262548
0.111085
0.113159
0.0774329
0.173199
0.0904207
0.367525
0.296374
0.347885
0.337245
0.236083
0.0337735
0.120267
0.181369
0.0353391
0.169421
0.0965234
0.0513417
0.321617
0.15215
0.167516
0.0251887

## Sheet: excSurfDensity_DL
0.658468
0.591697
0.758773
0.727357
0.461675
0.494027
0.575836
0.187957
0.730419
0.204513
0.10545
0.31384
0.528974
0.258433
0.487114
0.212862
0.3412
0.416793
0.381139
0.285694
0.273774
0.411219
0.23621
0.476612
0.608666
0.219972
0.33171
0.227438
0.351302
0.451288
0.282058
0.266793
0.35402
0.323873
0.40048
0.251178
0.498666
0.213976
0.232219
0.325642
0.341583
