# Supplementary material for: Cell-type specific innervation of cortical pyramidal cells at their apical dendrites
Source: eLife. 2020 Feb 28;9:e46876. doi: 10.7554/eLife.46876 (PMC7297530; doi:10.7554/eLife.46876)
Supplement: Figure 3—source data 1. [file elife-46876-fig3-data1.xlsx]

## Sheet: S1_layer2
treeIndex	L2Apical	DeepApical	Shaft	SpineDouble	SpineSingle	Soma	AIS	Glia
inhibitoryAxonLayer2ApicalDendriteSeeded01	0.137931	0	0.482759	0.0344828	0.0344828	0.310345	0	0
inhibitoryAxonLayer2ApicalDendriteSeeded02	0.129032	0	0.548387	0.16129	0	0.16129	0	0
inhibitoryAxonLayer2ApicalDendriteSeeded03	0.0515464	0.0618557	0.57732	0.0721649	0.0103093	0.216495	0.0103093	0
inhibitoryAxonLayer2ApicalDendriteSeeded04	0.111111	0	0.666667	0.111111	0	0.111111	0	0
inhibitoryAxonLayer2ApicalDendriteSeeded05	0.0322581	0	0.564516	0.274194	0	0.0967742	0.0322581	0
inhibitoryAxonLayer2ApicalDendriteSeeded06	0.2	0.2	0.2	0	0	0.4	0	0
inhibitoryAxonLayer2ApicalDendriteSeeded07	0.117647	0.0588235	0.558824	0.147059	0	0.0882353	0.0294118	0
inhibitoryAxonLayer2ApicalDendriteSeeded08	0.137255	0.0980392	0.372549	0.156863	0	0.235294	0	0
inhibitoryAxonLayer2ApicalDendriteSeeded09	0.0361446	0.0120482	0.60241	0.120482	0	0.192771	0.0361446	0
inhibitoryAxonLayer2ApicalDendriteSeeded10	0.277778	0	0.444444	0.166667	0	0.111111	0	0
inhibitoryAxonLayer2ApicalDendriteSeeded11	0.05	0.0375	0.55	0.175	0.0125	0.1625	0.0125	0
inhibitoryAxonLayer2ApicalDendriteSeeded12	0	0	0.5	0.119048	0	0.380952	0	0
inhibitoryAxonLayer2ApicalDendriteSeeded13	0.25	0	0.625	0.125	0	0	0	0
inhibitoryAxonLayer2ApicalDendriteSeeded14	0.015873	0.031746	0.698413	0.015873	0	0.190476	0.047619	0
inhibitoryAxonLayer2ApicalDendriteSeeded15	0.0588235	0	0.764706	0.147059	0	0.0294118	0	0
inhibitoryAxonLayer2ApicalDendriteSeeded16	0.142857	0	0.47619	0.047619	0	0.333333	0	0
inhibitoryAxonLayer2ApicalDendriteSeeded17	0.0568182	0.0340909	0.511364	0.0681818	0	0.329545	0	0
inhibitoryAxonLayer2ApicalDendriteSeeded18	0	0	0.6	0.3	0	0.1	0	0
inhibitoryAxonLayer2ApicalDendriteSeeded19	0.0869565	0	0.565217	0.0434783	0	0.304348	0	0
inhibitoryAxonLayer2ApicalDendriteSeeded20	0.333333	0.111111	0.388889	0.0555556	0	0.111111	0	0
inhibitoryAxonLayer2ApicalDendriteSeeded21	0.214286	0	0.571429	0.142857	0	0.0714286	0	0

## Sheet: S1_deepLayer
treeIndex	L2Apical	DeepApical	Shaft	SpineDouble	SpineSingle	Soma	AIS	Glia
inhibitoryAxonDeepLayerApicalDendriteSeeded01	0.0634921	0.142857	0.571429	0.015873	0.031746	0.174603	0	0
inhibitoryAxonDeepLayerApicalDendriteSeeded02	0	0.0833333	0.5	0.25	0	0.166667	0	0
inhibitoryAxonDeepLayerApicalDendriteSeeded03	0.0232558	0.0232558	0.372093	0.139535	0	0.418605	0.0232558	0
inhibitoryAxonDeepLayerApicalDendriteSeeded04	0	0.142857	0.785714	0.0714286	0	0	0	0
inhibitoryAxonDeepLayerApicalDendriteSeeded05	0.0454545	0.227273	0.318182	0.227273	0	0.181818	0	0
inhibitoryAxonDeepLayerApicalDendriteSeeded06	0.0555556	0.111111	0.611111	0.222222	0	0	0	0
inhibitoryAxonDeepLayerApicalDendriteSeeded07	0.121212	0.151515	0.454545	0.0909091	0	0.181818	0	0
inhibitoryAxonDeepLayerApicalDendriteSeeded08	0	0	0.590909	0.0909091	0	0.318182	0	0
inhibitoryAxonDeepLayerApicalDendriteSeeded09	0.166667	0.0714286	0.333333	0.119048	0.0238095	0.285714	0	0
inhibitoryAxonDeepLayerApicalDendriteSeeded10	0	0.166667	0.4	0.133333	0.0333333	0.266667	0	0
inhibitoryAxonDeepLayerApicalDendriteSeeded11	0	0.214286	0.214286	0.5	0	0.0714286	0	0
inhibitoryAxonDeepLayerApicalDendriteSeeded12	0	0.0714286	0.428571	0.0714286	0	0.428571	0	0
inhibitoryAxonDeepLayerApicalDendriteSeeded13	0.238095	0.190476	0.428571	0.0952381	0	0.047619	0	0
inhibitoryAxonDeepLayerApicalDendriteSeeded14	0	0.526316	0.368421	0.105263	0	0	0	0
inhibitoryAxonDeepLayerApicalDendriteSeeded15	0	0.0666667	0.533333	0.133333	0	0.266667	0	0
inhibitoryAxonDeepLayerApicalDendriteSeeded16	0.0344828	0.0689655	0.482759	0.137931	0	0.275862	0	0
inhibitoryAxonDeepLayerApicalDendriteSeeded17	0	0.294118	0.411765	0.294118	0	0	0	0
inhibitoryAxonDeepLayerApicalDendriteSeeded18	0.111111	0	0.333333	0.111111	0	0.444444	0	0
inhibitoryAxonDeepLayerApicalDendriteSeeded19	0.0194175	0.0291262	0.504854	0.116505	0	0.330097	0	0

## Sheet: V2_layer2
treeIndex	L2Apical	DeepApical	Shaft	SpineDouble	SpineSingle	Soma	AIS	Glia
inhibitoryAxonLayer2ApicalDendriteSeeded01	0.111111	0	0.333333	0	0	0.555556	0	0
inhibitoryAxonLayer2ApicalDendriteSeeded02	0.2	0.05	0.45	0.1	0	0.2	0	0
inhibitoryAxonLayer2ApicalDendriteSeeded03	0.352941	0	0.352941	0.117647	0	0.176471	0	0
inhibitoryAxonLayer2ApicalDendriteSeeded04	0.0606061	0.151515	0.424242	0.0909091	0	0.272727	0	0
inhibitoryAxonLayer2ApicalDendriteSeeded05	0.0833333	0	0.5	0	0	0.416667	0	0
inhibitoryAxonLayer2ApicalDendriteSeeded06	0.176471	0	0.705882	0	0	0.117647	0	0
inhibitoryAxonLayer2ApicalDendriteSeeded07	0	0.0909091	0.818182	0	0	0.0909091	0	0
inhibitoryAxonLayer2ApicalDendriteSeeded08	0.157895	0	0.473684	0	0.210526	0.157895	0	0
inhibitoryAxonLayer2ApicalDendriteSeeded09	0.5	0	0.5	0	0	0	0	0
inhibitoryAxonLayer2ApicalDendriteSeeded10	0.466667	0	0.133333	0	0	0.4	0	0
inhibitoryAxonLayer2ApicalDendriteSeeded11	0.111111	0.148148	0.481481	0.148148	0.037037	0.0740741	0	0
inhibitoryAxonLayer2ApicalDendriteSeeded12	0.0625	0	0.28125	0.0625	0.0625	0.5	0.03125	0
inhibitoryAxonLayer2ApicalDendriteSeeded13	0	0	0.555556	0.333333	0.111111	0	0	0
inhibitoryAxonLayer2ApicalDendriteSeeded14	0.103448	0	0.37931	0.275862	0.0344828	0.172414	0.0344828	0
inhibitoryAxonLayer2ApicalDendriteSeeded15	0	0	0.545455	0.0909091	0.0909091	0.181818	0.0909091	0
inhibitoryAxonLayer2ApicalDendriteSeeded16	0.1	0	0.25	0.15	0	0.5	0	0
inhibitoryAxonLayer2ApicalDendriteSeeded17	0.285714	0	0.142857	0.571429	0	0	0	0
inhibitoryAxonLayer2ApicalDendriteSeeded18	0.222222	0	0.222222	0.111111	0	0.444444	0	0
inhibitoryAxonLayer2ApicalDendriteSeeded19	0	0	0.375	0	0	0.625	0	0
inhibitoryAxonLayer2ApicalDendriteSeeded20	0	0.115385	0.807692	0	0	0.0769231	0	0

## Sheet: V2_deepLayer
treeIndex	L2Apical	DeepApical	Shaft	SpineDouble	SpineSingle	Soma	AIS	Glia
inhibitoryAxonDeepLayerApicalDendriteSeeded01	0	0.193548	0.741935	0.0645161	0	0	0	0
inhibitoryAxonDeepLayerApicalDendriteSeeded02	0	0.333333	0.166667	0	0.5	0	0	0
inhibitoryAxonDeepLayerApicalDendriteSeeded03	0	0.0454545	0.909091	0.0454545	0	0	0	0
inhibitoryAxonDeepLayerApicalDendriteSeeded04	0	0	0.666667	0.333333	0	0	0	0
inhibitoryAxonDeepLayerApicalDendriteSeeded05	0	0.111111	0.666667	0.185185	0.037037	0	0	0
inhibitoryAxonDeepLayerApicalDendriteSeeded06	0	0.0833333	0.916667	0	0	0	0	0
inhibitoryAxonDeepLayerApicalDendriteSeeded07	0	0.0568182	0.897727	0.0454545	0	0	0	0
inhibitoryAxonDeepLayerApicalDendriteSeeded08	0.0447761	0.0298507	0.597015	0.164179	0.0895522	0.0746269	0	0
inhibitoryAxonDeepLayerApicalDendriteSeeded09	0	0.133333	0.333333	0.2	0.266667	0	0.0666667	0
inhibitoryAxonDeepLayerApicalDendriteSeeded10	0.125	0.125	0.125	0.25	0	0.375	0	0
inhibitoryAxonDeepLayerApicalDendriteSeeded11	0.0740741	0.0185185	0.62963	0.277778	0	0	0	0
inhibitoryAxonDeepLayerApicalDendriteSeeded12	0	0.0714286	0.571429	0.142857	0	0.214286	0	0
inhibitoryAxonDeepLayerApicalDendriteSeeded13	0	0.0925926	0.666667	0.212963	0.0277778	0	0	0
inhibitoryAxonDeepLayerApicalDendriteSeeded14	0	0.0325203	0.617886	0.341463	0.00813008	0	0	0
inhibitoryAxonDeepLayerApicalDendriteSeeded15	0	0.206349	0.619048	0.15873	0.015873	0	0	0
inhibitoryAxonDeepLayerApicalDendriteSeeded16	0	0.166667	0.5	0.166667	0.166667	0	0	0
inhibitoryAxonDeepLayerApicalDendriteSeeded17	0	0.254902	0.647059	0.0784314	0	0	0.0196078	0
inhibitoryAxonDeepLayerApicalDendriteSeeded18	0	0.4	0.466667	0.133333	0	0	0	0
inhibitoryAxonDeepLayerApicalDendriteSeeded19	0.0384615	0.230769	0.461538	0.115385	0	0.153846	0	0
inhibitoryAxonDeepLayerApicalDendriteSeeded20	0	0.04	0.96	0	0	0	0	0

## Sheet: PPC_layer2
treeIndex	L2Apical	DeepApical	Shaft	SpineDouble	SpineSingle	Soma	AIS	Glia
inhibitoryAxonLayer2ApicalDendriteSeeded01	0.5	0	0	0	0	0.5	0	0
inhibitoryAxonLayer2ApicalDendriteSeeded02	0.0294118	0.117647	0.794118	0	0	0.0588235	0	0
inhibitoryAxonLayer2ApicalDendriteSeeded03	0	0.285714	0.571429	0	0	0.142857	0	0
inhibitoryAxonLayer2ApicalDendriteSeeded04	0.0869565	0.130435	0.608696	0.0434783	0	0.130435	0	0
inhibitoryAxonLayer2ApicalDendriteSeeded05	0.0882353	0.0588235	0.617647	0.117647	0	0.0882353	0.0294118	0
inhibitoryAxonLayer2ApicalDendriteSeeded06	0.105263	0	0.368421	0.157895	0	0.315789	0.0526316	0
inhibitoryAxonLayer2ApicalDendriteSeeded07	0	0	0.526316	0.315789	0	0.157895	0	0
inhibitoryAxonLayer2ApicalDendriteSeeded08	0.159091	0.0909091	0.409091	0.0909091	0	0.204545	0.0454545	0
inhibitoryAxonLayer2ApicalDendriteSeeded09	0.0769231	0.017094	0.410256	0.196581	0.00854701	0.247863	0.042735	0
inhibitoryAxonLayer2ApicalDendriteSeeded10	0.142857	0.0285714	0.228571	0.285714	0.114286	0.2	0	0
inhibitoryAxonLayer2ApicalDendriteSeeded11	0.24	0	0.36	0.16	0.02	0.22	0	0
inhibitoryAxonLayer2ApicalDendriteSeeded12	0.157895	0.0526316	0	0	0	0.789474	0	0
inhibitoryAxonLayer2ApicalDendriteSeeded13	0.125	0	0.75	0	0	0.125	0	0
inhibitoryAxonLayer2ApicalDendriteSeeded14	0.119048	0.190476	0.642857	0.047619	0	0	0	0
inhibitoryAxonLayer2ApicalDendriteSeeded15	0.125	0	0.6875	0	0	0.1875	0	0
inhibitoryAxonLayer2ApicalDendriteSeeded16	0.111111	0.0666667	0.711111	0.0666667	0.0222222	0.0222222	0	0
inhibitoryAxonLayer2ApicalDendriteSeeded17	0.205882	0	0.382353	0.176471	0	0.235294	0	0
inhibitoryAxonLayer2ApicalDendriteSeeded18	0.347826	0.0434783	0.173913	0.173913	0	0.26087	0	0
inhibitoryAxonLayer2ApicalDendriteSeeded19	0.0909091	0.0909091	0.454545	0	0	0.272727	0.0909091	0
inhibitoryAxonLayer2ApicalDendriteSeeded20	0.5	0.0625	0.125	0.25	0	0	0.0625	0
inhibitoryAxonLayer2ApicalDendriteSeeded21	0.233333	0.1	0.266667	0.2	0	0.166667	0.0333333	0

## Sheet: PPC_deepLayer
treeIndex	L2Apical	DeepApical	Shaft	SpineDouble	SpineSingle	Soma	AIS	Glia
inhibitoryAxonDeepLayerApicalDendriteSeeded01	0	0.416667	0.333333	0.25	0	0	0	0
inhibitoryAxonDeepLayerApicalDendriteSeeded02	0.428571	0.142857	0	0.285714	0	0	0.142857	0
inhibitoryAxonDeepLayerApicalDendriteSeeded03	0	0.0869565	0.826087	0.0869565	0	0	0	0
inhibitoryAxonDeepLayerApicalDendriteSeeded04	0.166667	0.333333	0.333333	0.166667	0	0	0	0
inhibitoryAxonDeepLayerApicalDendriteSeeded05	0	0.157895	0.789474	0.0526316	0	0	0	0
inhibitoryAxonDeepLayerApicalDendriteSeeded06	0.16	0.146667	0.4	0.146667	0.0133333	0.133333	0	0
inhibitoryAxonDeepLayerApicalDendriteSeeded07	0	0.2	0.7	0.1	0	0	0	0
inhibitoryAxonDeepLayerApicalDendriteSeeded08	0	0.272727	0.454545	0.272727	0	0	0	0
inhibitoryAxonDeepLayerApicalDendriteSeeded09	0.133333	0.2	0.466667	0	0.2	0	0	0
inhibitoryAxonDeepLayerApicalDendriteSeeded10	0	0.357143	0.428571	0.142857	0	0	0	0.0714286
inhibitoryAxonDeepLayerApicalDendriteSeeded11	0	0.75	0	0.25	0	0	0	0
inhibitoryAxonDeepLayerApicalDendriteSeeded12	0	0.333333	0.5	0.0833333	0	0.0833333	0	0
inhibitoryAxonDeepLayerApicalDendriteSeeded13	0.311111	0	0.222222	0.244444	0.0222222	0.2	0	0
inhibitoryAxonDeepLayerApicalDendriteSeeded14	0	0.5	0	0.5	0	0	0	0
inhibitoryAxonDeepLayerApicalDendriteSeeded15	0.0857143	0.542857	0.142857	0.171429	0	0.0571429	0	0
inhibitoryAxonDeepLayerApicalDendriteSeeded16	0.0555556	0	0.777778	0.166667	0	0	0	0
inhibitoryAxonDeepLayerApicalDendriteSeeded17	0	0.2	0.6	0	0	0.2	0	0
inhibitoryAxonDeepLayerApicalDendriteSeeded18	0	0.230769	0.384615	0.346154	0	0	0.0384615	0
inhibitoryAxonDeepLayerApicalDendriteSeeded19	0	0	0.75	0	0	0.25	0	0
inhibitoryAxonDeepLayerApicalDendriteSeeded20	0.0394737	0.0263158	0.434211	0.289474	0	0.210526	0	0

## Sheet: ACC_layer2
treeIndex	L2Apical	DeepApical	Shaft	SpineDouble	SpineSingle	Soma	AIS	Glia
inhibitoryAxonLayer2ApicalDendriteSeeded01	0.0357143	0	0.392857	0.464286	0	0.107143	0	0
inhibitoryAxonLayer2ApicalDendriteSeeded02	0.1875	0	0.625	0.1875	0	0	0	0
inhibitoryAxonLayer2ApicalDendriteSeeded03	0.0465116	0.0465116	0.651163	0.0697674	0.0697674	0.116279	0	0
inhibitoryAxonLayer2ApicalDendriteSeeded04	0.037037	0.222222	0.592593	0.111111	0	0.037037	0	0
inhibitoryAxonLayer2ApicalDendriteSeeded05	0.103448	0	0.310345	0.586207	0	0	0	0
inhibitoryAxonLayer2ApicalDendriteSeeded06	0.21875	0	0.5	0.125	0	0.15625	0	0
inhibitoryAxonLayer2ApicalDendriteSeeded07	0.153846	0	0.5	0.0769231	0	0.269231	0	0
inhibitoryAxonLayer2ApicalDendriteSeeded08	0.222222	0	0.222222	0.555556	0	0	0	0
inhibitoryAxonLayer2ApicalDendriteSeeded09	0.0769231	0	0.897436	0	0	0.025641	0	0
inhibitoryAxonLayer2ApicalDendriteSeeded10	0.125	0.125	0.5	0.125	0	0.125	0	0
inhibitoryAxonLayer2ApicalDendriteSeeded11	0.166667	0.0555556	0.222222	0.333333	0	0.166667	0.0555556	0
inhibitoryAxonLayer2ApicalDendriteSeeded12	0.324324	0.027027	0.216216	0.135135	0.0540541	0.243243	0	0
inhibitoryAxonLayer2ApicalDendriteSeeded13	0.0526316	0.0263158	0.394737	0.394737	0.0263158	0.105263	0	0
inhibitoryAxonLayer2ApicalDendriteSeeded14	0.416667	0.0277778	0.222222	0.277778	0	0.0555556	0	0
inhibitoryAxonLayer2ApicalDendriteSeeded15	0.142857	0.0714286	0.142857	0	0	0.642857	0	0
inhibitoryAxonLayer2ApicalDendriteSeeded16	0.153846	0	0.615385	0.153846	0	0.0769231	0	0
inhibitoryAxonLayer2ApicalDendriteSeeded17	0.444444	0.222222	0.333333	0	0	0	0	0
inhibitoryAxonLayer2ApicalDendriteSeeded18	0.461538	0	0.307692	0.0769231	0.0769231	0.0769231	0	0
inhibitoryAxonLayer2ApicalDendriteSeeded19	0.0217391	0.0652174	0.456522	0.0652174	0.0217391	0.304348	0.0652174	0
inhibitoryAxonLayer2ApicalDendriteSeeded20	0.238095	0.0952381	0.380952	0.238095	0	0.047619	0	0
inhibitoryAxonLayer2ApicalDendriteSeeded21	0.28	0	0.56	0.12	0	0.04	0	0
inhibitoryAxonLayer2ApicalDendriteSeeded22	0.333333	0	0.5	0.166667	0	0	0	0
inhibitoryAxonLayer2ApicalDendriteSeeded23	0.0571429	0.0285714	0.342857	0.0857143	0.0571429	0.4	0.0285714	0
inhibitoryAxonLayer2ApicalDendriteSeeded24	0.181818	0.0454545	0.454545	0.0454545	0	0.272727	0	0
inhibitoryAxonLayer2ApicalDendriteSeeded25	0.347826	0.130435	0.217391	0.26087	0.0434783	0	0	0
inhibitoryAxonLayer2ApicalDendriteSeeded26	0.25	0	0.416667	0	0	0.333333	0	0
inhibitoryAxonLayer2ApicalDendriteSeeded27	0	0.04	0.48	0.18	0.02	0.26	0.02	0
inhibitoryAxonLayer2ApicalDendriteSeeded28	0.0555556	0.0277778	0.361111	0.111111	0.0555556	0.361111	0.0277778	0
inhibitoryAxonLayer2ApicalDendriteSeeded29	0.0714286	0	0.5	0.285714	0	0.142857	0	0
inhibitoryAxonLayer2ApicalDendriteSeeded30	0.5	0	0.166667	0	0	0.333333	0	0

## Sheet: ACC_deepLayer
treeIndex	L2Apical	DeepApical	Shaft	SpineDouble	SpineSingle	Soma	AIS	Glia
inhibitoryAxonDeepLayerApicalDendriteSeeded01	0.0833333	0	0.25	0	0	0.666667	0	0
inhibitoryAxonDeepLayerApicalDendriteSeeded02	0	0.0263158	0.578947	0.368421	0	0.0263158	0	0
inhibitoryAxonDeepLayerApicalDendriteSeeded03	0.047619	0.119048	0.738095	0	0	0.0952381	0	0
inhibitoryAxonDeepLayerApicalDendriteSeeded04	0.0777778	0.0444444	0.744444	0.0888889	0	0.0333333	0	0.0111111
inhibitoryAxonDeepLayerApicalDendriteSeeded05	0	0.222222	0.666667	0.111111	0	0	0	0
inhibitoryAxonDeepLayerApicalDendriteSeeded06	0.125	0.1875	0.6875	0	0	0	0	0
inhibitoryAxonDeepLayerApicalDendriteSeeded07	0	0.636364	0.272727	0	0.0909091	0	0	0
inhibitoryAxonDeepLayerApicalDendriteSeeded08	0.0666667	0	0.8	0.0666667	0	0.0666667	0	0
inhibitoryAxonDeepLayerApicalDendriteSeeded09	0.111111	0	0.5	0.0555556	0	0.333333	0	0
inhibitoryAxonDeepLayerApicalDendriteSeeded10	0.111111	0	0.333333	0	0	0.555556	0	0
inhibitoryAxonDeepLayerApicalDendriteSeeded11	0	0	0.75	0.25	0	0	0	0
inhibitoryAxonDeepLayerApicalDendriteSeeded12	0.142857	0.285714	0.428571	0.142857	0	0	0	0
inhibitoryAxonDeepLayerApicalDendriteSeeded13	0.157895	0.0526316	0.789474	0	0	0	0	0
inhibitoryAxonDeepLayerApicalDendriteSeeded14	0.00493827	0.0320988	0.861728	0.0888889	0.00493827	0.00740741	0	0
inhibitoryAxonDeepLayerApicalDendriteSeeded15	0.0810811	0.0540541	0.837838	0.027027	0	0	0	0
inhibitoryAxonDeepLayerApicalDendriteSeeded16	0.027027	0	0.27027	0.108108	0.027027	0.540541	0.027027	0
inhibitoryAxonDeepLayerApicalDendriteSeeded17	0.0555556	0.0555556	0.166667	0	0	0.722222	0	0
inhibitoryAxonDeepLayerApicalDendriteSeeded18	0.0697674	0.0465116	0.395349	0.0697674	0.0232558	0.325581	0.0697674	0
inhibitoryAxonDeepLayerApicalDendriteSeeded19	0.111111	0.111111	0.777778	0	0	0	0	0
inhibitoryAxonDeepLayerApicalDendriteSeeded20	0.1	0.1	0.5	0.3	0	0	0	0
inhibitoryAxonDeepLayerApicalDendriteSeeded21	0.09375	0.0625	0.6875	0.0625	0	0.09375	0	0
inhibitoryAxonDeepLayerApicalDendriteSeeded22	0	0.0526316	0.578947	0.315789	0	0	0.0526316	0
inhibitoryAxonDeepLayerApicalDendriteSeeded23	0.1875	0.0625	0.4375	0.0625	0	0.25	0	0
inhibitoryAxonDeepLayerApicalDendriteSeeded24	0.146341	0.0243902	0.439024	0.341463	0	0.0487805	0	0
inhibitoryAxonDeepLayerApicalDendriteSeeded25	0	0.181818	0.590909	0.227273	0	0	0	0
inhibitoryAxonDeepLayerApicalDendriteSeeded26	0.02	0.14	0.7	0.12	0	0.02	0	0
inhibitoryAxonDeepLayerApicalDendriteSeeded27	0.181818	0.272727	0.363636	0.0909091	0	0.0909091	0	0
inhibitoryAxonDeepLayerApicalDendriteSeeded28	0.142857	0.357143	0.285714	0	0	0.214286	0	0
inhibitoryAxonDeepLayerApicalDendriteSeeded29	0.0588235	0.176471	0.352941	0.411765	0	0	0	0
inhibitoryAxonDeepLayerApicalDendriteSeeded30	0	0.32	0.6	0	0	0.08	0	0
inhibitoryAxonDeepLayerApicalDendriteSeeded31	0	0.133333	0.866667	0	0	0	0	0
inhibitoryAxonDeepLayerApicalDendriteSeeded32	0	0.125	0.708333	0.125	0	0.0416667	0	0

## Sheet: Aggregate_layer2
treeIndex	L2Apical	DeepApical	Shaft	SpineDouble	SpineSingle	Soma	AIS	Glia
inhibitoryAxonLayer2ApicalDendriteSeeded01	0.137931	0	0.482759	0.0344828	0.0344828	0.310345	0	0
inhibitoryAxonLayer2ApicalDendriteSeeded02	0.129032	0	0.548387	0.16129	0	0.16129	0	0
inhibitoryAxonLayer2ApicalDendriteSeeded03	0.0515464	0.0618557	0.57732	0.0721649	0.0103093	0.216495	0.0103093	0
inhibitoryAxonLayer2ApicalDendriteSeeded04	0.111111	0	0.666667	0.111111	0	0.111111	0	0
inhibitoryAxonLayer2ApicalDendriteSeeded05	0.0322581	0	0.564516	0.274194	0	0.0967742	0.0322581	0
inhibitoryAxonLayer2ApicalDendriteSeeded06	0.2	0.2	0.2	0	0	0.4	0	0
inhibitoryAxonLayer2ApicalDendriteSeeded07	0.117647	0.0588235	0.558824	0.147059	0	0.0882353	0.0294118	0
inhibitoryAxonLayer2ApicalDendriteSeeded08	0.137255	0.0980392	0.372549	0.156863	0	0.235294	0	0
inhibitoryAxonLayer2ApicalDendriteSeeded09	0.0361446	0.0120482	0.60241	0.120482	0	0.192771	0.0361446	0
inhibitoryAxonLayer2ApicalDendriteSeeded10	0.277778	0	0.444444	0.166667	0	0.111111	0	0
inhibitoryAxonLayer2ApicalDendriteSeeded11	0.05	0.0375	0.55	0.175	0.0125	0.1625	0.0125	0
inhibitoryAxonLayer2ApicalDendriteSeeded12	0	0	0.5	0.119048	0	0.380952	0	0
inhibitoryAxonLayer2ApicalDendriteSeeded13	0.25	0	0.625	0.125	0	0	0	0
inhibitoryAxonLayer2ApicalDendriteSeeded14	0.015873	0.031746	0.698413	0.015873	0	0.190476	0.047619	0
inhibitoryAxonLayer2ApicalDendriteSeeded15	0.0588235	0	0.764706	0.147059	0	0.0294118	0	0
inhibitoryAxonLayer2ApicalDendriteSeeded16	0.142857	0	0.47619	0.047619	0	0.333333	0	0
inhibitoryAxonLayer2ApicalDendriteSeeded17	0.0568182	0.0340909	0.511364	0.0681818	0	0.329545	0	0
inhibitoryAxonLayer2ApicalDendriteSeeded18	0	0	0.6	0.3	0	0.1	0	0
inhibitoryAxonLayer2ApicalDendriteSeeded19	0.0869565	0	0.565217	0.0434783	0	0.304348	0	0
inhibitoryAxonLayer2ApicalDendriteSeeded20	0.333333	0.111111	0.388889	0.0555556	0	0.111111	0	0
inhibitoryAxonLayer2ApicalDendriteSeeded21	0.214286	0	0.571429	0.142857	0	0.0714286	0	0
inhibitoryAxonLayer2ApicalDendriteSeeded01	0.111111	0	0.333333	0	0	0.555556	0	0
inhibitoryAxonLayer2ApicalDendriteSeeded02	0.2	0.05	0.45	0.1	0	0.2	0	0
inhibitoryAxonLayer2ApicalDendriteSeeded03	0.352941	0	0.352941	0.117647	0	0.176471	0	0
inhibitoryAxonLayer2ApicalDendriteSeeded04	0.0606061	0.151515	0.424242	0.0909091	0	0.272727	0	0
inhibitoryAxonLayer2ApicalDendriteSeeded05	0.0833333	0	0.5	0	0	0.416667	0	0
inhibitoryAxonLayer2ApicalDendriteSeeded06	0.176471	0	0.705882	0	0	0.117647	0	0
inhibitoryAxonLayer2ApicalDendriteSeeded07	0	0.0909091	0.818182	0	0	0.0909091	0	0
inhibitoryAxonLayer2ApicalDendriteSeeded08	0.157895	0	0.473684	0	0.210526	0.157895	0	0
inhibitoryAxonLayer2ApicalDendriteSeeded09	0.5	0	0.5	0	0	0	0	0
inhibitoryAxonLayer2ApicalDendriteSeeded10	0.466667	0	0.133333	0	0	0.4	0	0
inhibitoryAxonLayer2ApicalDendriteSeeded11	0.111111	0.148148	0.481481	0.148148	0.037037	0.0740741	0	0
inhibitoryAxonLayer2ApicalDendriteSeeded12	0.0625	0	0.28125	0.0625	0.0625	0.5	0.03125	0
inhibitoryAxonLayer2ApicalDendriteSeeded13	0	0	0.555556	0.333333	0.111111	0	0	0
inhibitoryAxonLayer2ApicalDendriteSeeded14	0.103448	0	0.37931	0.275862	0.0344828	0.172414	0.0344828	0
inhibitoryAxonLayer2ApicalDendriteSeeded15	0	0	0.545455	0.0909091	0.0909091	0.181818	0.0909091	0
inhibitoryAxonLayer2ApicalDendriteSeeded16	0.1	0	0.25	0.15	0	0.5	0	0
inhibitoryAxonLayer2ApicalDendriteSeeded17	0.285714	0	0.142857	0.571429	0	0	0	0
inhibitoryAxonLayer2ApicalDendriteSeeded18	0.222222	0	0.222222	0.111111	0	0.444444	0	0
inhibitoryAxonLayer2ApicalDendriteSeeded19	0	0	0.375	0	0	0.625	0	0
inhibitoryAxonLayer2ApicalDendriteSeeded20	0	0.115385	0.807692	0	0	0.0769231	0	0
inhibitoryAxonLayer2ApicalDendriteSeeded01	0.5	0	0	0	0	0.5	0	0
inhibitoryAxonLayer2ApicalDendriteSeeded02	0.0294118	0.117647	0.794118	0	0	0.0588235	0	0
inhibitoryAxonLayer2ApicalDendriteSeeded03	0	0.285714	0.571429	0	0	0.142857	0	0
inhibitoryAxonLayer2ApicalDendriteSeeded04	0.0869565	0.130435	0.608696	0.0434783	0	0.130435	0	0
inhibitoryAxonLayer2ApicalDendriteSeeded05	0.0882353	0.0588235	0.617647	0.117647	0	0.0882353	0.0294118	0
inhibitoryAxonLayer2ApicalDendriteSeeded06	0.105263	0	0.368421	0.157895	0	0.315789	0.0526316	0
inhibitoryAxonLayer2ApicalDendriteSeeded07	0	0	0.526316	0.315789	0	0.157895	0	0
inhibitoryAxonLayer2ApicalDendriteSeeded08	0.159091	0.0909091	0.409091	0.0909091	0	0.204545	0.0454545	0
inhibitoryAxonLayer2ApicalDendriteSeeded09	0.0769231	0.017094	0.410256	0.196581	0.00854701	0.247863	0.042735	0
inhibitoryAxonLayer2ApicalDendriteSeeded10	0.142857	0.0285714	0.228571	0.285714	0.114286	0.2	0	0
inhibitoryAxonLayer2ApicalDendriteSeeded11	0.24	0	0.36	0.16	0.02	0.22	0	0
inhibitoryAxonLayer2ApicalDendriteSeeded12	0.157895	0.0526316	0	0	0	0.789474	0	0
inhibitoryAxonLayer2ApicalDendriteSeeded13	0.125	0	0.75	0	0	0.125	0	0
inhibitoryAxonLayer2ApicalDendriteSeeded14	0.119048	0.190476	0.642857	0.047619	0	0	0	0
inhibitoryAxonLayer2ApicalDendriteSeeded15	0.125	0	0.6875	0	0	0.1875	0	0
inhibitoryAxonLayer2ApicalDendriteSeeded16	0.111111	0.0666667	0.711111	0.0666667	0.0222222	0.0222222	0	0
inhibitoryAxonLayer2ApicalDendriteSeeded17	0.205882	0	0.382353	0.176471	0	0.235294	0	0
inhibitoryAxonLayer2ApicalDendriteSeeded18	0.347826	0.0434783	0.173913	0.173913	0	0.26087	0	0
inhibitoryAxonLayer2ApicalDendriteSeeded19	0.0909091	0.0909091	0.454545	0	0	0.272727	0.0909091	0
inhibitoryAxonLayer2ApicalDendriteSeeded20	0.5	0.0625	0.125	0.25	0	0	0.0625	0
inhibitoryAxonLayer2ApicalDendriteSeeded21	0.233333	0.1	0.266667	0.2	0	0.166667	0.0333333	0
inhibitoryAxonLayer2ApicalDendriteSeeded01	0.0357143	0	0.392857	0.464286	0	0.107143	0	0
inhibitoryAxonLayer2ApicalDendriteSeeded02	0.1875	0	0.625	0.1875	0	0	0	0
inhibitoryAxonLayer2ApicalDendriteSeeded03	0.0465116	0.0465116	0.651163	0.0697674	0.0697674	0.116279	0	0
inhibitoryAxonLayer2ApicalDendriteSeeded04	0.037037	0.222222	0.592593	0.111111	0	0.037037	0	0
inhibitoryAxonLayer2ApicalDendriteSeeded05	0.103448	0	0.310345	0.586207	0	0	0	0
inhibitoryAxonLayer2ApicalDendriteSeeded06	0.21875	0	0.5	0.125	0	0.15625	0	0
inhibitoryAxonLayer2ApicalDendriteSeeded07	0.153846	0	0.5	0.0769231	0	0.269231	0	0
inhibitoryAxonLayer2ApicalDendriteSeeded08	0.222222	0	0.222222	0.555556	0	0	0	0
inhibitoryAxonLayer2ApicalDendriteSeeded09	0.0769231	0	0.897436	0	0	0.025641	0	0
inhibitoryAxonLayer2ApicalDendriteSeeded10	0.125	0.125	0.5	0.125	0	0.125	0	0
inhibitoryAxonLayer2ApicalDendriteSeeded11	0.166667	0.0555556	0.222222	0.333333	0	0.166667	0.0555556	0
inhibitoryAxonLayer2ApicalDendriteSeeded12	0.324324	0.027027	0.216216	0.135135	0.0540541	0.243243	0	0
inhibitoryAxonLayer2ApicalDendriteSeeded13	0.0526316	0.0263158	0.394737	0.394737	0.0263158	0.105263	0	0
inhibitoryAxonLayer2ApicalDendriteSeeded14	0.416667	0.0277778	0.222222	0.277778	0	0.0555556	0	0
inhibitoryAxonLayer2ApicalDendriteSeeded15	0.142857	0.0714286	0.142857	0	0	0.642857	0	0
inhibitoryAxonLayer2ApicalDendriteSeeded16	0.153846	0	0.615385	0.153846	0	0.0769231	0	0
inhibitoryAxonLayer2ApicalDendriteSeeded17	0.444444	0.222222	0.333333	0	0	0	0	0
inhibitoryAxonLayer2ApicalDendriteSeeded18	0.461538	0	0.307692	0.0769231	0.0769231	0.0769231	0	0
inhibitoryAxonLayer2ApicalDendriteSeeded19	0.0217391	0.0652174	0.456522	0.0652174	0.0217391	0.304348	0.0652174	0
inhibitoryAxonLayer2ApicalDendriteSeeded20	0.238095	0.0952381	0.380952	0.238095	0	0.047619	0	0
inhibitoryAxonLayer2ApicalDendriteSeeded21	0.28	0	0.56	0.12	0	0.04	0	0
inhibitoryAxonLayer2ApicalDendriteSeeded22	0.333333	0	0.5	0.166667	0	0	0	0
inhibitoryAxonLayer2ApicalDendriteSeeded23	0.0571429	0.0285714	0.342857	0.0857143	0.0571429	0.4	0.0285714	0
inhibitoryAxonLayer2ApicalDendriteSeeded24	0.181818	0.0454545	0.454545	0.0454545	0	0.272727	0	0
inhibitoryAxonLayer2ApicalDendriteSeeded25	0.347826	0.130435	0.217391	0.26087	0.0434783	0	0	0
inhibitoryAxonLayer2ApicalDendriteSeeded26	0.25	0	0.416667	0	0	0.333333	0	0
inhibitoryAxonLayer2ApicalDendriteSeeded27	0	0.04	0.48	0.18	0.02	0.26	0.02	0
inhibitoryAxonLayer2ApicalDendriteSeeded28	0.0555556	0.0277778	0.361111	0.111111	0.0555556	0.361111	0.0277778	0
inhibitoryAxonLayer2ApicalDendriteSeeded29	0.0714286	0	0.5	0.285714	0	0.142857	0	0
inhibitoryAxonLayer2ApicalDendriteSeeded30	0.5	0	0.166667	0	0	0.333333	0	0

## Sheet: Aggregate_deepLayer
treeIndex	L2Apical	DeepApical	Shaft	SpineDouble	SpineSingle	Soma	AIS	Glia
inhibitoryAxonDeepLayerApicalDendriteSeeded01	0.0634921	0.142857	0.571429	0.015873	0.031746	0.174603	0	0
inhibitoryAxonDeepLayerApicalDendriteSeeded02	0	0.0833333	0.5	0.25	0	0.166667	0	0
inhibitoryAxonDeepLayerApicalDendriteSeeded03	0.0232558	0.0232558	0.372093	0.139535	0	0.418605	0.0232558	0
inhibitoryAxonDeepLayerApicalDendriteSeeded04	0	0.142857	0.785714	0.0714286	0	0	0	0
inhibitoryAxonDeepLayerApicalDendriteSeeded05	0.0454545	0.227273	0.318182	0.227273	0	0.181818	0	0
inhibitoryAxonDeepLayerApicalDendriteSeeded06	0.0555556	0.111111	0.611111	0.222222	0	0	0	0
inhibitoryAxonDeepLayerApicalDendriteSeeded07	0.121212	0.151515	0.454545	0.0909091	0	0.181818	0	0
inhibitoryAxonDeepLayerApicalDendriteSeeded08	0	0	0.590909	0.0909091	0	0.318182	0	0
inhibitoryAxonDeepLayerApicalDendriteSeeded09	0.166667	0.0714286	0.333333	0.119048	0.0238095	0.285714	0	0
inhibitoryAxonDeepLayerApicalDendriteSeeded10	0	0.166667	0.4	0.133333	0.0333333	0.266667	0	0
inhibitoryAxonDeepLayerApicalDendriteSeeded11	0	0.214286	0.214286	0.5	0	0.0714286	0	0
inhibitoryAxonDeepLayerApicalDendriteSeeded12	0	0.0714286	0.428571	0.0714286	0	0.428571	0	0
inhibitoryAxonDeepLayerApicalDendriteSeeded13	0.238095	0.190476	0.428571	0.0952381	0	0.047619	0	0
inhibitoryAxonDeepLayerApicalDendriteSeeded14	0	0.526316	0.368421	0.105263	0	0	0	0
inhibitoryAxonDeepLayerApicalDendriteSeeded15	0	0.0666667	0.533333	0.133333	0	0.266667	0	0
inhibitoryAxonDeepLayerApicalDendriteSeeded16	0.0344828	0.0689655	0.482759	0.137931	0	0.275862	0	0
inhibitoryAxonDeepLayerApicalDendriteSeeded17	0	0.294118	0.411765	0.294118	0	0	0	0
inhibitoryAxonDeepLayerApicalDendriteSeeded18	0.111111	0	0.333333	0.111111	0	0.444444	0	0
inhibitoryAxonDeepLayerApicalDendriteSeeded19	0.0194175	0.0291262	0.504854	0.116505	0	0.330097	0	0
inhibitoryAxonDeepLayerApicalDendriteSeeded01	0	0.193548	0.741935	0.0645161	0	0	0	0
inhibitoryAxonDeepLayerApicalDendriteSeeded02	0	0.333333	0.166667	0	0.5	0	0	0
inhibitoryAxonDeepLayerApicalDendriteSeeded03	0	0.0454545	0.909091	0.0454545	0	0	0	0
inhibitoryAxonDeepLayerApicalDendriteSeeded04	0	0	0.666667	0.333333	0	0	0	0
inhibitoryAxonDeepLayerApicalDendriteSeeded05	0	0.111111	0.666667	0.185185	0.037037	0	0	0
inhibitoryAxonDeepLayerApicalDendriteSeeded06	0	0.0833333	0.916667	0	0	0	0	0
inhibitoryAxonDeepLayerApicalDendriteSeeded07	0	0.0568182	0.897727	0.0454545	0	0	0	0
inhibitoryAxonDeepLayerApicalDendriteSeeded08	0.0447761	0.0298507	0.597015	0.164179	0.0895522	0.0746269	0	0
inhibitoryAxonDeepLayerApicalDendriteSeeded09	0	0.133333	0.333333	0.2	0.266667	0	0.0666667	0
inhibitoryAxonDeepLayerApicalDendriteSeeded10	0.125	0.125	0.125	0.25	0	0.375	0	0
inhibitoryAxonDeepLayerApicalDendriteSeeded11	0.0740741	0.0185185	0.62963	0.277778	0	0	0	0
inhibitoryAxonDeepLayerApicalDendriteSeeded12	0	0.0714286	0.571429	0.142857	0	0.214286	0	0
inhibitoryAxonDeepLayerApicalDendriteSeeded13	0	0.0925926	0.666667	0.212963	0.0277778	0	0	0
inhibitoryAxonDeepLayerApicalDendriteSeeded14	0	0.0325203	0.617886	0.341463	0.00813008	0	0	0
inhibitoryAxonDeepLayerApicalDendriteSeeded15	0	0.206349	0.619048	0.15873	0.015873	0	0	0
inhibitoryAxonDeepLayerApicalDendriteSeeded16	0	0.166667	0.5	0.166667	0.166667	0	0	0
inhibitoryAxonDeepLayerApicalDendriteSeeded17	0	0.254902	0.647059	0.0784314	0	0	0.0196078	0
inhibitoryAxonDeepLayerApicalDendriteSeeded18	0	0.4	0.466667	0.133333	0	0	0	0
inhibitoryAxonDeepLayerApicalDendriteSeeded19	0.0384615	0.230769	0.461538	0.115385	0	0.153846	0	0
inhibitoryAxonDeepLayerApicalDendriteSeeded20	0	0.04	0.96	0	0	0	0	0
inhibitoryAxonDeepLayerApicalDendriteSeeded01	0	0.416667	0.333333	0.25	0	0	0	0
inhibitoryAxonDeepLayerApicalDendriteSeeded02	0.428571	0.142857	0	0.285714	0	0	0.142857	0
inhibitoryAxonDeepLayerApicalDendriteSeeded03	0	0.0869565	0.826087	0.0869565	0	0	0	0
inhibitoryAxonDeepLayerApicalDendriteSeeded04	0.166667	0.333333	0.333333	0.166667	0	0	0	0
inhibitoryAxonDeepLayerApicalDendriteSeeded05	0	0.157895	0.789474	0.0526316	0	0	0	0
inhibitoryAxonDeepLayerApicalDendriteSeeded06	0.16	0.146667	0.4	0.146667	0.0133333	0.133333	0	0
inhibitoryAxonDeepLayerApicalDendriteSeeded07	0	0.2	0.7	0.1	0	0	0	0
inhibitoryAxonDeepLayerApicalDendriteSeeded08	0	0.272727	0.454545	0.272727	0	0	0	0
inhibitoryAxonDeepLayerApicalDendriteSeeded09	0.133333	0.2	0.466667	0	0.2	0	0	0
inhibitoryAxonDeepLayerApicalDendriteSeeded10	0	0.357143	0.428571	0.142857	0	0	0	0.0714286
inhibitoryAxonDeepLayerApicalDendriteSeeded11	0	0.75	0	0.25	0	0	0	0
inhibitoryAxonDeepLayerApicalDendriteSeeded12	0	0.333333	0.5	0.0833333	0	0.0833333	0	0
inhibitoryAxonDeepLayerApicalDendriteSeeded13	0.311111	0	0.222222	0.244444	0.0222222	0.2	0	0
inhibitoryAxonDeepLayerApicalDendriteSeeded14	0	0.5	0	0.5	0	0	0	0
inhibitoryAxonDeepLayerApicalDendriteSeeded15	0.0857143	0.542857	0.142857	0.171429	0	0.0571429	0	0
inhibitoryAxonDeepLayerApicalDendriteSeeded16	0.0555556	0	0.777778	0.166667	0	0	0	0
inhibitoryAxonDeepLayerApicalDendriteSeeded17	0	0.2	0.6	0	0	0.2	0	0
inhibitoryAxonDeepLayerApicalDendriteSeeded18	0	0.230769	0.384615	0.346154	0	0	0.0384615	0
inhibitoryAxonDeepLayerApicalDendriteSeeded19	0	0	0.75	0	0	0.25	0	0
inhibitoryAxonDeepLayerApicalDendriteSeeded20	0.0394737	0.0263158	0.434211	0.289474	0	0.210526	0	0
inhibitoryAxonDeepLayerApicalDendriteSeeded01	0.0833333	0	0.25	0	0	0.666667	0	0
inhibitoryAxonDeepLayerApicalDendriteSeeded02	0	0.0263158	0.578947	0.368421	0	0.0263158	0	0
inhibitoryAxonDeepLayerApicalDendriteSeeded03	0.047619	0.119048	0.738095	0	0	0.0952381	0	0
inhibitoryAxonDeepLayerApicalDendriteSeeded04	0.0777778	0.0444444	0.744444	0.0888889	0	0.0333333	0	0.0111111
inhibitoryAxonDeepLayerApicalDendriteSeeded05	0	0.222222	0.666667	0.111111	0	0	0	0
inhibitoryAxonDeepLayerApicalDendriteSeeded06	0.125	0.1875	0.6875	0	0	0	0	0
inhibitoryAxonDeepLayerApicalDendriteSeeded07	0	0.636364	0.272727	0	0.0909091	0	0	0
inhibitoryAxonDeepLayerApicalDendriteSeeded08	0.0666667	0	0.8	0.0666667	0	0.0666667	0	0
inhibitoryAxonDeepLayerApicalDendriteSeeded09	0.111111	0	0.5	0.0555556	0	0.333333	0	0
inhibitoryAxonDeepLayerApicalDendriteSeeded10	0.111111	0	0.333333	0	0	0.555556	0	0
inhibitoryAxonDeepLayerApicalDendriteSeeded11	0	0	0.75	0.25	0	0	0	0
inhibitoryAxonDeepLayerApicalDendriteSeeded12	0.142857	0.285714	0.428571	0.142857	0	0	0	0
inhibitoryAxonDeepLayerApicalDendriteSeeded13	0.157895	0.0526316	0.789474	0	0	0	0	0
inhibitoryAxonDeepLayerApicalDendriteSeeded14	0.00493827	0.0320988	0.861728	0.0888889	0.00493827	0.00740741	0	0
inhibitoryAxonDeepLayerApicalDendriteSeeded15	0.0810811	0.0540541	0.837838	0.027027	0	0	0	0
inhibitoryAxonDeepLayerApicalDendriteSeeded16	0.027027	0	0.27027	0.108108	0.027027	0.540541	0.027027	0
inhibitoryAxonDeepLayerApicalDendriteSeeded17	0.0555556	0.0555556	0.166667	0	0	0.722222	0	0
inhibitoryAxonDeepLayerApicalDendriteSeeded18	0.0697674	0.0465116	0.395349	0.0697674	0.0232558	0.325581	0.0697674	0
inhibitoryAxonDeepLayerApicalDendriteSeeded19	0.111111	0.111111	0.777778	0	0	0	0	0
inhibitoryAxonDeepLayerApicalDendriteSeeded20	0.1	0.1	0.5	0.3	0	0	0	0
inhibitoryAxonDeepLayerApicalDendriteSeeded21	0.09375	0.0625	0.6875	0.0625	0	0.09375	0	0
inhibitoryAxonDeepLayerApicalDendriteSeeded22	0	0.0526316	0.578947	0.315789	0	0	0.0526316	0
inhibitoryAxonDeepLayerApicalDendriteSeeded23	0.1875	0.0625	0.4375	0.0625	0	0.25	0	0
inhibitoryAxonDeepLayerApicalDendriteSeeded24	0.146341	0.0243902	0.439024	0.341463	0	0.0487805	0	0
inhibitoryAxonDeepLayerApicalDendriteSeeded25	0	0.181818	0.590909	0.227273	0	0	0	0
inhibitoryAxonDeepLayerApicalDendriteSeeded26	0.02	0.14	0.7	0.12	0	0.02	0	0
inhibitoryAxonDeepLayerApicalDendriteSeeded27	0.181818	0.272727	0.363636	0.0909091	0	0.0909091	0	0
inhibitoryAxonDeepLayerApicalDendriteSeeded28	0.142857	0.357143	0.285714	0	0	0.214286	0	0
inhibitoryAxonDeepLayerApicalDendriteSeeded29	0.0588235	0.176471	0.352941	0.411765	0	0	0	0
inhibitoryAxonDeepLayerApicalDendriteSeeded30	0	0.32	0.6	0	0	0.08	0	0
inhibitoryAxonDeepLayerApicalDendriteSeeded31	0	0.133333	0.866667	0	0	0	0	0
inhibitoryAxonDeepLayerApicalDendriteSeeded32	0	0.125	0.708333	0.125	0	0.0416667	0	0
