# Supplementary material for: Cell-type specific innervation of cortical pyramidal cells at their apical dendrites
Source: eLife. 2020 Feb 28;9:e46876. doi: 10.7554/eLife.46876 (PMC7297530; doi:10.7554/eLife.46876)
Supplement: Figure 3—source data 2. [file elife-46876-fig3-data2.xlsx]

## Sheet: S1_layer2
treeIndex	bifurcationCoord_1	bifurcationCoord_2	bifurcationCoord_3
layer2ApicalDendrite01	46747	147780	168504
layer2ApicalDendrite02	85233	141295	16212
layer2ApicalDendrite03	44005	137698	18704
layer2ApicalDendrite04	77028	138035	84784
layer2ApicalDendrite05	32169	136304	70812
layer2ApicalDendrite06	82097	151321	16184
layer2ApicalDendrite07	43679	139732	138712
layer2ApicalDendrite08	38002	145914	99064
layer2ApicalDendrite09	35788	151523	197820
layer2ApicalDendrite10	20547	145768	110264

## Sheet: S1_deepLayer
treeIndex	bifurcationCoord_1	bifurcationCoord_2	bifurcationCoord_3
deepLayerApicalDendrite01	58032	166641	155428
deepLayerApicalDendrite02	20221	157536	45612
deepLayerApicalDendrite03	71745	163437	94696
deepLayerApicalDendrite04	66204	169754	21420
deepLayerApicalDendrite05	60561	141261	15960
deepLayerApicalDendrite06	31641	162212	169176
deepLayerApicalDendrite07	33327	165888	96516
deepLayerApicalDendrite08	19872	143992	67228
deepLayerApicalDendrite09	52300	151489	146468
deepLayerApicalDendrite10	22098	156851	114716

## Sheet: V2_layer2
treeIndex	bifurcationCoord_1	bifurcationCoord_2	bifurcationCoord_3
layer2ApicalDendrite01	51312	221868	114180
layer2ApicalDendrite02	66372	235908	80820
layer2ApicalDendrite03	70212	229680	123510
layer2ApicalDendrite04	47796	231840	124740
layer2ApicalDendrite05	50820	224028	95670
layer2ApicalDendrite06	27324	235968	127200
layer2ApicalDendrite07	31284	255876	105300
layer2ApicalDendrite08	24732	248832	130620
layer2ApicalDendrite09	50340	243648	143910
layer2ApicalDendrite10	52572	226716	45900

## Sheet: V2_deepLayer
treeIndex	bifurcationCoord_1	bifurcationCoord_2	bifurcationCoord_3
deepLayerApicalDendrite01	33696	237156	46980
deepLayerApicalDendrite02	57852	231432	118800
deepLayerApicalDendrite03	54840	272376	138120
deepLayerApicalDendrite04	54912	227832	84420
deepLayerApicalDendrite05	50508	230376	84210
deepLayerApicalDendrite06	37692	272100	117480
deepLayerApicalDendrite07	43464	260316	144450
deepLayerApicalDendrite08	69876	234648	115590
deepLayerApicalDendrite09	57420	289140	123300
deepLayerApicalDendrite10	73920	229416	73350

## Sheet: PPC_layer2
treeIndex	bifurcationCoord_1	bifurcationCoord_2	bifurcationCoord_3
layer2ApicalDendrite01	76464	180576	112560
layer2ApicalDendrite02	32040	203892	119100
layer2ApicalDendrite03	44508	199632	98040
layer2ApicalDendrite04	31920	203844	104640
layer2ApicalDendrite05	20592	241632	82740
layer2ApicalDendrite06	67344	212136	111090
layer2ApicalDendrite07	26496	210264	88020
layer2ApicalDendrite08	55812	193872	127290
layer2ApicalDendrite09	59952	180216	72420
layer2ApicalDendrite10	40932	200712	60000

## Sheet: PPC_deepLayer
treeIndex	bifurcationCoord_1	bifurcationCoord_2	bifurcationCoord_3
deepLayerApicalDendrite01	28932	210060	107490
deepLayerApicalDendrite02	36516	192300	130410
deepLayerApicalDendrite03	51648	195792	108540
deepLayerApicalDendrite04	65196	209952	118170
deepLayerApicalDendrite05	63036	206796	104640
deepLayerApicalDendrite06	72288	225504	116850
deepLayerApicalDendrite07	25596	190728	92340
deepLayerApicalDendrite08	22596	197340	80910
deepLayerApicalDendrite09	36444	216876	131340
deepLayerApicalDendrite10	30060	220272	112020

## Sheet: ACC_layer2
treeIndex	bifurcationCoord_1	bifurcationCoord_2	bifurcationCoord_3
layer2ApicalDendrite01	67104	198104	53130
layer2ApicalDendrite02	35544	171932	16230
layer2ApicalDendrite03	61428	186320	29790
layer2ApicalDendrite04	63684	182228	16110
layer2ApicalDendrite05	73404	186608	34320
layer2ApicalDendrite06	51756	180728	8010
layer2ApicalDendrite07	87708	189152	8400
layer2ApicalDendrite08	60264	151832	18570
layer2ApicalDendrite09	55464	190280	83520
layer2ApicalDendrite10	39156	190976	85590
layer2ApicalDendrite11	76776	189152	59850

## Sheet: ACC_deepLayer
treeIndex	bifurcationCoord_1	bifurcationCoord_2	bifurcationCoord_3
deepLayerApicalDendrite01	61224	157448	33990
deepLayerApicalDendrite02	56352	199532	15570
deepLayerApicalDendrite03	71952	188732	41040
deepLayerApicalDendrite04	58332	191804	84300
deepLayerApicalDendrite05	74496	209864	10050
deepLayerApicalDendrite06	71064	190484	39840
deepLayerApicalDendrite07	60804	193268	82020
deepLayerApicalDendrite08	84192	192728	39210
deepLayerApicalDendrite09	43860	196184	16200
deepLayerApicalDendrite10	63228	181244	84240
deepLayerApicalDendrite11	34680	197528	93450

## Sheet: Aggregate_layer2
treeIndex	bifurcationCoord_1	bifurcationCoord_2	bifurcationCoord_3
layer2ApicalDendrite01	46747	147780	168504
layer2ApicalDendrite02	85233	141295	16212
layer2ApicalDendrite03	44005	137698	18704
layer2ApicalDendrite04	77028	138035	84784
layer2ApicalDendrite05	32169	136304	70812
layer2ApicalDendrite06	82097	151321	16184
layer2ApicalDendrite07	43679	139732	138712
layer2ApicalDendrite08	38002	145914	99064
layer2ApicalDendrite09	35788	151523	197820
layer2ApicalDendrite10	20547	145768	110264
layer2ApicalDendrite01	51312	221868	114180
layer2ApicalDendrite02	66372	235908	80820
layer2ApicalDendrite03	70212	229680	123510
layer2ApicalDendrite04	47796	231840	124740
layer2ApicalDendrite05	50820	224028	95670
layer2ApicalDendrite06	27324	235968	127200
layer2ApicalDendrite07	31284	255876	105300
layer2ApicalDendrite08	24732	248832	130620
layer2ApicalDendrite09	50340	243648	143910
layer2ApicalDendrite10	52572	226716	45900
layer2ApicalDendrite01	76464	180576	112560
layer2ApicalDendrite02	32040	203892	119100
layer2ApicalDendrite03	44508	199632	98040
layer2ApicalDendrite04	31920	203844	104640
layer2ApicalDendrite05	20592	241632	82740
layer2ApicalDendrite06	67344	212136	111090
layer2ApicalDendrite07	26496	210264	88020
layer2ApicalDendrite08	55812	193872	127290
layer2ApicalDendrite09	59952	180216	72420
layer2ApicalDendrite10	40932	200712	60000
layer2ApicalDendrite01	67104	198104	53130
layer2ApicalDendrite02	35544	171932	16230
layer2ApicalDendrite03	61428	186320	29790
layer2ApicalDendrite04	63684	182228	16110
layer2ApicalDendrite05	73404	186608	34320
layer2ApicalDendrite06	51756	180728	8010
layer2ApicalDendrite07	87708	189152	8400
layer2ApicalDendrite08	60264	151832	18570
layer2ApicalDendrite09	55464	190280	83520
layer2ApicalDendrite10	39156	190976	85590
layer2ApicalDendrite11	76776	189152	59850

## Sheet: Aggregate_deepLayer
treeIndex	bifurcationCoord_1	bifurcationCoord_2	bifurcationCoord_3
deepLayerApicalDendrite01	58032	166641	155428
deepLayerApicalDendrite02	20221	157536	45612
deepLayerApicalDendrite03	71745	163437	94696
deepLayerApicalDendrite04	66204	169754	21420
deepLayerApicalDendrite05	60561	141261	15960
deepLayerApicalDendrite06	31641	162212	169176
deepLayerApicalDendrite07	33327	165888	96516
deepLayerApicalDendrite08	19872	143992	67228
deepLayerApicalDendrite09	52300	151489	146468
deepLayerApicalDendrite10	22098	156851	114716
deepLayerApicalDendrite01	33696	237156	46980
deepLayerApicalDendrite02	57852	231432	118800
deepLayerApicalDendrite03	54840	272376	138120
deepLayerApicalDendrite04	54912	227832	84420
deepLayerApicalDendrite05	50508	230376	84210
deepLayerApicalDendrite06	37692	272100	117480
deepLayerApicalDendrite07	43464	260316	144450
deepLayerApicalDendrite08	69876	234648	115590
deepLayerApicalDendrite09	57420	289140	123300
deepLayerApicalDendrite10	73920	229416	73350
deepLayerApicalDendrite01	28932	210060	107490
deepLayerApicalDendrite02	36516	192300	130410
deepLayerApicalDendrite03	51648	195792	108540
deepLayerApicalDendrite04	65196	209952	118170
deepLayerApicalDendrite05	63036	206796	104640
deepLayerApicalDendrite06	72288	225504	116850
deepLayerApicalDendrite07	25596	190728	92340
deepLayerApicalDendrite08	22596	197340	80910
deepLayerApicalDendrite09	36444	216876	131340
deepLayerApicalDendrite10	30060	220272	112020
deepLayerApicalDendrite01	61224	157448	33990
deepLayerApicalDendrite02	56352	199532	15570
deepLayerApicalDendrite03	71952	188732	41040
deepLayerApicalDendrite04	58332	191804	84300
deepLayerApicalDendrite05	74496	209864	10050
deepLayerApicalDendrite06	71064	190484	39840
deepLayerApicalDendrite07	60804	193268	82020
deepLayerApicalDendrite08	84192	192728	39210
deepLayerApicalDendrite09	43860	196184	16200
deepLayerApicalDendrite10	63228	181244	84240
deepLayerApicalDendrite11	34680	197528	93450
