# Supplementary material for: Cell-type specific innervation of cortical pyramidal cells at their apical dendrites
Source: eLife. 2020 Feb 28;9:e46876. doi: 10.7554/eLife.46876 (PMC7297530; doi:10.7554/eLife.46876)
Supplement: Figure 3—source data 3. [file elife-46876-fig3-data3.xlsx]

## Sheet: layer2_pathFraction
Row	S1	V2	PPC	ACC
10 um
30 um
50 um
70 um
90 um
110 um
130 um	0.226497			0.0184066
150 um	0.507266			0.0769283
170 um	0.219854		0.0696906	0.212843
190 um	0.0463841		0.239856	0.302487
210 um		0.0277507	0.319183	0.22315
230 um		0.273097	0.193581	0.131419
250 um		0.364046	0.15792	0.0347669
270 um		0.199876	0.01977
290 um		0.0874098
310 um		0.047821

## Sheet: deep_pathFraction
Row	S1	V2	PPC	ACC
10 um
30 um
50 um
70 um
90 um
110 um				0.0342666
130 um	0.10335			0.0996302
150 um	0.37705			0.145725
170 um	0.406304		0.043261	0.201193
190 um	0.113296		0.202107	0.2419
210 um		0.0230915	0.348	0.19055
230 um		0.316722	0.269259	0.0720375
250 um		0.230791	0.122415	0.0146977
270 um		0.218146	0.0149582
290 um		0.151537
310 um		0.0597136
