# Supplementary material for: Cell-type specific innervation of cortical pyramidal cells at their apical dendrites
Source: eLife. 2020 Feb 28;9:e46876. doi: 10.7554/eLife.46876 (PMC7297530; doi:10.7554/eLife.46876)
Supplement: Figure 3—source data 4. [file elife-46876-fig3-data4.xlsx]

## Sheet: L2Apical_L2seeded
3
1
1.33333
1
1
2
1.5
2
1
1.25
1
1
1
1
1
3
1
1
4
1.5
1
1
1.5
1
1
2
1
1
1
1
1
1
1
1
2.5
2
1.66667
2.4
1
1
2.5
1
1.25
2.5
2
1
2
1.75
1
1
1
1.5
1.16667
1.33333
1
1
1
1
1.125
1
2.8
1
2
1
2
1.16667
1
1
1
1.75
1
1
1
2

## Sheet: L2Apical_DLseeded
1
1
1
1
1.33333
2.33333
1.66667
1
1
1
1.5
1
1.33333
1
3
1
1.2
2
1.55556
1.5
1
1.5
1
1
1.4
2
1
2
1
1
1
2
1
1
1
1
1
1
1
1
1.2
1
1
2
1

## Sheet: DeepApical_L2seeded
1.2
1
1
1.66667
1
1
1
1.5
2
1
1.66667
1
1.33333
1
1.33333
1
1
1
1.33333
2
1
1
1.6
1.5
1
1
1
1.5
1
1.5
1
1
1
1
1
1
2
1.5
1
1
1
1
1
1

## Sheet: DeepApical_DLseeded
1.28571
1
1
1.25
1
1.5
1
1
3
1.5
1.28571
1
1
1.66667
1
2
1
1
1.66667
1
1
1
1
1.2
1
2.4
1.18182
1.2
1.2
1.25
1
2
1
1.42857
1
1.66667
1.5
1
1.33333
1.63636
1
1
1
1
2
1
1.5
1.5
2
1
1
1
1
1
2
1
1
1
1
1
1.33333
2
2
1.5
1.75
1
1
