# Supplementary material for: Cell-type specific innervation of cortical pyramidal cells at their apical dendrites
Source: eLife. 2020 Feb 28;9:e46876. doi: 10.7554/eLife.46876 (PMC7297530; doi:10.7554/eLife.46876)
Supplement: Figure 3—source data 5. [file elife-46876-fig3-data5.xlsx]

## Sheet: S1_MultiInnervationMatrices
treeIndex	L2Apical_ 1	L2Apical_ 2	L2Apical_ 3	L2Apical_ 4	L2Apical_ 5	L2Apical_ 6	L2Apical_ 7	L2Apical_ 8	L2Apical_ 9	L2Apical_10	DeepApical_ 1	DeepApical_ 2	DeepApical_ 3	DeepApical_ 4	DeepApical_ 5	DeepApical_ 6	DeepApical_ 7	DeepApical_ 8	DeepApical_ 9	DeepApical_10
inhibitoryAxonDeepLayerApicalDendriteSeeded01	4	0	0	0	0	0	0	0	0	0	6	0	1	0	0	0	0	0	0	0
inhibitoryAxonDeepLayerApicalDendriteSeeded02	0	0	0	0	0	0	0	0	0	0	0	0	0	0	0	0	0	0	0	0
inhibitoryAxonDeepLayerApicalDendriteSeeded03	1	0	0	0	0	0	0	0	0	0	1	0	0	0	0	0	0	0	0	0
inhibitoryAxonDeepLayerApicalDendriteSeeded04	0	0	0	0	0	0	0	0	0	0	4	0	0	0	0	0	0	0	0	0
inhibitoryAxonDeepLayerApicalDendriteSeeded05	1	0	0	0	0	0	0	0	0	0	3	1	0	0	0	0	0	0	0	0
inhibitoryAxonDeepLayerApicalDendriteSeeded06	1	0	0	0	0	0	0	0	0	0	1	0	0	0	0	0	0	0	0	0
inhibitoryAxonDeepLayerApicalDendriteSeeded07	2	1	0	0	0	0	0	0	0	0	1	1	0	0	0	0	0	0	0	0
inhibitoryAxonDeepLayerApicalDendriteSeeded08	0	0	0	0	0	0	0	0	0	0	0	0	0	0	0	0	0	0	0	0
inhibitoryAxonDeepLayerApicalDendriteSeeded09	1	1	0	1	0	0	0	0	0	0	2	0	0	0	0	0	0	0	0	0
inhibitoryAxonDeepLayerApicalDendriteSeeded10	0	0	0	0	0	0	0	0	0	0	3	0	0	0	0	0	0	0	0	0
inhibitoryAxonDeepLayerApicalDendriteSeeded11	0	0	0	0	0	0	0	0	0	0	0	0	1	0	0	0	0	0	0	0
inhibitoryAxonDeepLayerApicalDendriteSeeded12	0	0	0	0	0	0	0	0	0	0	0	0	0	0	0	0	0	0	0	0
inhibitoryAxonDeepLayerApicalDendriteSeeded13	1	2	0	0	0	0	0	0	0	0	1	1	0	0	0	0	0	0	0	0
inhibitoryAxonDeepLayerApicalDendriteSeeded14	0	0	0	0	0	0	0	0	0	0	6	0	1	0	0	0	0	0	0	0
inhibitoryAxonDeepLayerApicalDendriteSeeded15	0	0	0	0	0	0	0	0	0	0	1	0	0	0	0	0	0	0	0	0
inhibitoryAxonDeepLayerApicalDendriteSeeded16	1	0	0	0	0	0	0	0	0	0	2	0	0	0	0	0	0	0	0	0
inhibitoryAxonDeepLayerApicalDendriteSeeded17	0	0	0	0	0	0	0	0	0	0	1	2	0	0	0	0	0	0	0	0
inhibitoryAxonDeepLayerApicalDendriteSeeded18	1	0	0	0	0	0	0	0	0	0	0	0	0	0	0	0	0	0	0	0
inhibitoryAxonDeepLayerApicalDendriteSeeded19	2	0	0	0	0	0	0	0	0	0	3	0	0	0	0	0	0	0	0	0
inhibitoryAxonLayer2ApicalDendriteSeeded01	0	0	1	0	0	0	0	0	0	0	0	0	0	0	0	0	0	0	0	0
inhibitoryAxonLayer2ApicalDendriteSeeded02	1	0	0	0	0	0	0	0	0	0	0	0	0	0	0	0	0	0	0	0
inhibitoryAxonLayer2ApicalDendriteSeeded03	2	1	0	0	0	0	0	0	0	0	4	1	0	0	0	0	0	0	0	0
inhibitoryAxonLayer2ApicalDendriteSeeded04	1	0	0	0	0	0	0	0	0	0	0	0	0	0	0	0	0	0	0	0
inhibitoryAxonLayer2ApicalDendriteSeeded05	2	0	0	0	0	0	0	0	0	0	0	0	0	0	0	0	0	0	0	0
inhibitoryAxonLayer2ApicalDendriteSeeded06	0	1	0	0	0	0	0	0	0	0	2	0	0	0	0	0	0	0	0	0
inhibitoryAxonLayer2ApicalDendriteSeeded07	1	1	0	0	0	0	0	0	0	0	2	0	0	0	0	0	0	0	0	0
inhibitoryAxonLayer2ApicalDendriteSeeded08	2	0	0	1	0	0	0	0	0	0	2	0	1	0	0	0	0	0	0	0
inhibitoryAxonLayer2ApicalDendriteSeeded09	3	0	0	0	0	0	0	0	0	0	1	0	0	0	0	0	0	0	0	0
inhibitoryAxonLayer2ApicalDendriteSeeded10	3	1	0	0	0	0	0	0	0	0	0	0	0	0	0	0	0	0	0	0
inhibitoryAxonLayer2ApicalDendriteSeeded11	3	0	0	0	0	0	0	0	0	0	3	0	0	0	0	0	0	0	0	0
inhibitoryAxonLayer2ApicalDendriteSeeded12	0	0	0	0	0	0	0	0	0	0	0	0	0	0	0	0	0	0	0	0
inhibitoryAxonLayer2ApicalDendriteSeeded13	0	0	0	0	0	0	0	0	0	0	0	0	0	0	0	0	0	0	0	0
inhibitoryAxonLayer2ApicalDendriteSeeded14	1	0	0	0	0	0	0	0	0	0	2	0	0	0	0	0	0	0	0	0
inhibitoryAxonLayer2ApicalDendriteSeeded15	0	0	0	0	0	0	0	0	0	0	0	0	0	0	0	0	0	0	0	0
inhibitoryAxonLayer2ApicalDendriteSeeded16	1	0	0	0	0	0	0	0	0	0	0	0	0	0	0	0	0	0	0	0
inhibitoryAxonLayer2ApicalDendriteSeeded17	4	0	0	0	0	0	0	0	0	0	1	1	0	0	0	0	0	0	0	0
inhibitoryAxonLayer2ApicalDendriteSeeded18	0	0	0	0	0	0	0	0	0	0	0	0	0	0	0	0	0	0	0	0
inhibitoryAxonLayer2ApicalDendriteSeeded19	2	0	0	0	0	0	0	0	0	0	0	0	0	0	0	0	0	0	0	0
inhibitoryAxonLayer2ApicalDendriteSeeded20	0	0	1	0	0	0	0	0	0	0	0	1	0	0	0	0	0	0	0	0
inhibitoryAxonLayer2ApicalDendriteSeeded21	1	0	0	0	0	0	0	0	0	0	0	0	0	0	0	0	0	0	0	0

## Sheet: V2_MultiInnervationMatrices
treeIndex	L2Apical_ 1	L2Apical_ 2	L2Apical_ 3	L2Apical_ 4	L2Apical_ 5	L2Apical_ 6	L2Apical_ 7	L2Apical_ 8	L2Apical_ 9	L2Apical_10	DeepApical_ 1	DeepApical_ 2	DeepApical_ 3	DeepApical_ 4	DeepApical_ 5	DeepApical_ 6	DeepApical_ 7	DeepApical_ 8	DeepApical_ 9	DeepApical_10
inhibitoryAxonDeepLayerApicalDendriteSeeded01	0	0	0	0	0	0	0	0	0	0	0	0	0	0	0	0	0	0	0	0
inhibitoryAxonDeepLayerApicalDendriteSeeded02	0	0	0	0	0	0	0	0	0	0	1	0	1	0	0	0	0	0	0	0
inhibitoryAxonDeepLayerApicalDendriteSeeded03	0	0	0	0	0	0	0	0	0	0	1	0	0	0	0	0	0	0	0	0
inhibitoryAxonDeepLayerApicalDendriteSeeded04	0	0	0	0	0	0	0	0	0	0	0	0	0	0	0	0	0	0	0	0
inhibitoryAxonDeepLayerApicalDendriteSeeded05	0	0	0	0	0	0	0	0	0	0	0	0	0	0	0	0	0	0	0	0
inhibitoryAxonDeepLayerApicalDendriteSeeded06	0	0	0	0	0	0	0	0	0	0	1	0	0	0	0	0	0	0	0	0
inhibitoryAxonDeepLayerApicalDendriteSeeded07	0	0	0	0	0	0	0	0	0	0	1	2	0	0	0	0	0	0	0	0
inhibitoryAxonDeepLayerApicalDendriteSeeded08	1	1	0	0	0	0	0	0	0	0	1	0	0	0	0	0	0	0	0	0
inhibitoryAxonDeepLayerApicalDendriteSeeded09	0	0	0	0	0	0	0	0	0	0	0	0	0	0	0	0	0	0	0	0
inhibitoryAxonDeepLayerApicalDendriteSeeded10	1	0	0	0	0	0	0	0	0	0	1	0	0	0	0	0	0	0	0	0
inhibitoryAxonDeepLayerApicalDendriteSeeded11	2	1	0	0	0	0	0	0	0	0	1	0	0	0	0	0	0	0	0	0
inhibitoryAxonDeepLayerApicalDendriteSeeded12	0	0	0	0	0	0	0	0	0	0	1	0	0	0	0	0	0	0	0	0
inhibitoryAxonDeepLayerApicalDendriteSeeded13	0	0	0	0	0	0	0	0	0	0	4	1	0	0	0	0	0	0	0	0
inhibitoryAxonDeepLayerApicalDendriteSeeded14	0	0	0	0	0	0	0	0	0	0	4	0	0	0	0	0	0	0	0	0
inhibitoryAxonDeepLayerApicalDendriteSeeded15	0	0	0	0	0	0	0	0	0	0	3	0	1	0	0	1	0	0	0	0
inhibitoryAxonDeepLayerApicalDendriteSeeded16	0	0	0	0	0	0	0	0	0	0	0	0	0	0	0	0	0	0	0	0
inhibitoryAxonDeepLayerApicalDendriteSeeded17	0	0	0	0	0	0	0	0	0	0	9	2	0	0	0	0	0	0	0	0
inhibitoryAxonDeepLayerApicalDendriteSeeded18	0	0	0	0	0	0	0	0	0	0	4	1	0	0	0	0	0	0	0	0
inhibitoryAxonDeepLayerApicalDendriteSeeded19	1	0	0	0	0	0	0	0	0	0	4	1	0	0	0	0	0	0	0	0
inhibitoryAxonDeepLayerApicalDendriteSeeded20	0	0	0	0	0	0	0	0	0	0	0	0	0	0	0	0	0	0	0	0
inhibitoryAxonLayer2ApicalDendriteSeeded01	1	0	0	0	0	0	0	0	0	0	0	0	0	0	0	0	0	0	0	0
inhibitoryAxonLayer2ApicalDendriteSeeded02	0	0	0	1	0	0	0	0	0	0	1	0	0	0	0	0	0	0	0	0
inhibitoryAxonLayer2ApicalDendriteSeeded03	1	1	0	0	0	0	0	0	0	0	0	0	0	0	0	0	0	0	0	0
inhibitoryAxonLayer2ApicalDendriteSeeded04	1	0	0	0	0	0	0	0	0	0	1	2	0	0	0	0	0	0	0	0
inhibitoryAxonLayer2ApicalDendriteSeeded05	1	0	0	0	0	0	0	0	0	0	0	0	0	0	0	0	0	0	0	0
inhibitoryAxonLayer2ApicalDendriteSeeded06	1	1	0	0	0	0	0	0	0	0	0	0	0	0	0	0	0	0	0	0
inhibitoryAxonLayer2ApicalDendriteSeeded07	0	0	0	0	0	0	0	0	0	0	1	0	0	0	0	0	0	0	0	0
inhibitoryAxonLayer2ApicalDendriteSeeded08	3	0	0	0	0	0	0	0	0	0	0	0	0	0	0	0	0	0	0	0
inhibitoryAxonLayer2ApicalDendriteSeeded09	2	0	0	0	0	0	0	0	0	0	0	0	0	0	0	0	0	0	0	0
inhibitoryAxonLayer2ApicalDendriteSeeded10	0	1	0	0	0	0	0	0	0	0	0	0	0	0	0	0	0	0	0	0
inhibitoryAxonLayer2ApicalDendriteSeeded11	3	0	0	0	0	0	0	0	0	0	2	1	0	0	0	0	0	0	0	0
inhibitoryAxonLayer2ApicalDendriteSeeded12	2	0	0	0	0	0	0	0	0	0	0	0	0	0	0	0	0	0	0	0
inhibitoryAxonLayer2ApicalDendriteSeeded13	0	0	0	0	0	0	0	0	0	0	0	0	0	0	0	0	0	0	0	0
inhibitoryAxonLayer2ApicalDendriteSeeded14	2	0	0	0	0	0	0	0	0	0	0	0	0	0	0	0	0	0	0	0
inhibitoryAxonLayer2ApicalDendriteSeeded15	0	0	0	0	0	0	0	0	0	0	0	0	0	0	0	0	0	0	0	0
inhibitoryAxonLayer2ApicalDendriteSeeded16	2	0	0	0	0	0	0	0	0	0	0	0	0	0	0	0	0	0	0	0
inhibitoryAxonLayer2ApicalDendriteSeeded17	0	0	0	0	0	0	0	0	0	0	0	0	0	0	0	0	0	0	0	0
inhibitoryAxonLayer2ApicalDendriteSeeded18	1	0	0	0	0	0	0	0	0	0	0	0	0	0	0	0	0	0	0	0
inhibitoryAxonLayer2ApicalDendriteSeeded19	0	0	0	0	0	0	0	0	0	0	0	0	0	0	0	0	0	0	0	0
inhibitoryAxonLayer2ApicalDendriteSeeded20	0	0	0	0	0	0	0	0	0	0	3	0	0	0	0	0	0	0	0	0

## Sheet: PPC_MultiInnervationMatrices
treeIndex	L2Apical_ 1	L2Apical_ 2	L2Apical_ 3	L2Apical_ 4	L2Apical_ 5	L2Apical_ 6	L2Apical_ 7	L2Apical_ 8	L2Apical_ 9	L2Apical_10	DeepApical_ 1	DeepApical_ 2	DeepApical_ 3	DeepApical_ 4	DeepApical_ 5	DeepApical_ 6	DeepApical_ 7	DeepApical_ 8	DeepApical_ 9	DeepApical_10
inhibitoryAxonDeepLayerApicalDendriteSeeded01	0	0	0	0	0	0	0	0	0	0	3	1	0	0	0	0	0	0	0	0
inhibitoryAxonDeepLayerApicalDendriteSeeded02	0	0	1	0	0	0	0	0	0	0	1	0	0	0	0	0	0	0	0	0
inhibitoryAxonDeepLayerApicalDendriteSeeded03	0	0	0	0	0	0	0	0	0	0	0	1	0	0	0	0	0	0	0	0
inhibitoryAxonDeepLayerApicalDendriteSeeded04	1	0	0	0	0	0	0	0	0	0	0	0	0	0	0	0	0	0	0	0
inhibitoryAxonDeepLayerApicalDendriteSeeded05	0	0	0	0	0	0	0	0	0	0	3	0	0	0	0	0	0	0	0	0
inhibitoryAxonDeepLayerApicalDendriteSeeded06	8	2	0	0	0	0	0	0	0	0	6	0	0	1	0	0	0	0	0	0
inhibitoryAxonDeepLayerApicalDendriteSeeded07	0	0	0	0	0	0	0	0	0	0	2	0	0	0	0	0	0	0	0	0
inhibitoryAxonDeepLayerApicalDendriteSeeded08	0	0	0	0	0	0	0	0	0	0	2	0	1	0	0	0	0	0	0	0
inhibitoryAxonDeepLayerApicalDendriteSeeded09	0	1	0	0	0	0	0	0	0	0	1	1	0	0	0	0	0	0	0	0
inhibitoryAxonDeepLayerApicalDendriteSeeded10	0	0	0	0	0	0	0	0	0	0	5	0	0	0	0	0	0	0	0	0
inhibitoryAxonDeepLayerApicalDendriteSeeded11	0	0	0	0	0	0	0	0	0	0	0	0	0	0	0	0	0	0	0	0
inhibitoryAxonDeepLayerApicalDendriteSeeded12	0	0	0	0	0	0	0	0	0	0	2	1	0	0	0	0	0	0	0	0
inhibitoryAxonDeepLayerApicalDendriteSeeded13	7	0	1	1	0	0	0	0	0	0	0	0	0	0	0	0	0	0	0	0
inhibitoryAxonDeepLayerApicalDendriteSeeded14	0	0	0	0	0	0	0	0	0	0	0	0	0	0	0	0	0	0	0	0
inhibitoryAxonDeepLayerApicalDendriteSeeded15	1	1	0	0	0	0	0	0	0	0	9	0	0	1	1	0	0	0	0	0
inhibitoryAxonDeepLayerApicalDendriteSeeded16	1	0	0	0	0	0	0	0	0	0	0	0	0	0	0	0	0	0	0	0
inhibitoryAxonDeepLayerApicalDendriteSeeded17	0	0	0	0	0	0	0	0	0	0	2	0	0	0	0	0	0	0	0	0
inhibitoryAxonDeepLayerApicalDendriteSeeded18	0	0	0	0	0	0	0	0	0	0	1	0	0	0	0	0	0	0	0	0
inhibitoryAxonDeepLayerApicalDendriteSeeded19	0	0	0	0	0	0	0	0	0	0	0	0	0	0	0	0	0	0	0	0
inhibitoryAxonDeepLayerApicalDendriteSeeded20	1	1	0	0	0	0	0	0	0	0	2	0	0	0	0	0	0	0	0	0
inhibitoryAxonLayer2ApicalDendriteSeeded01	0	0	0	0	0	0	0	0	0	0	0	0	0	0	0	0	0	0	0	0
inhibitoryAxonLayer2ApicalDendriteSeeded02	1	0	0	0	0	0	0	0	0	0	2	1	0	0	0	0	0	0	0	0
inhibitoryAxonLayer2ApicalDendriteSeeded03	0	0	0	0	0	0	0	0	0	0	2	0	0	0	0	0	0	0	0	0
inhibitoryAxonLayer2ApicalDendriteSeeded04	2	0	0	0	0	0	0	0	0	0	3	0	0	0	0	0	0	0	0	0
inhibitoryAxonLayer2ApicalDendriteSeeded05	0	0	0	0	0	0	0	0	0	0	2	0	0	0	0	0	0	0	0	0
inhibitoryAxonLayer2ApicalDendriteSeeded06	2	0	0	0	0	0	0	0	0	0	0	0	0	0	0	0	0	0	0	0
inhibitoryAxonLayer2ApicalDendriteSeeded07	0	0	0	0	0	0	0	0	0	0	0	0	0	0	0	0	0	0	0	0
inhibitoryAxonLayer2ApicalDendriteSeeded08	0	1	1	0	0	0	0	0	0	0	2	1	0	0	0	0	0	0	0	0
inhibitoryAxonLayer2ApicalDendriteSeeded09	1	2	1	0	0	0	0	0	0	0	0	1	0	0	0	0	0	0	0	0
inhibitoryAxonLayer2ApicalDendriteSeeded10	1	2	0	0	0	0	0	0	0	0	1	0	0	0	0	0	0	0	0	0
inhibitoryAxonLayer2ApicalDendriteSeeded11	2	0	2	1	0	0	0	0	0	0	0	0	0	0	0	0	0	0	0	0
inhibitoryAxonLayer2ApicalDendriteSeeded12	3	0	0	0	0	0	0	0	0	0	1	0	0	0	0	0	0	0	0	0
inhibitoryAxonLayer2ApicalDendriteSeeded13	1	0	0	0	0	0	0	0	0	0	0	0	0	0	0	0	0	0	0	0
inhibitoryAxonLayer2ApicalDendriteSeeded14	1	0	0	1	0	0	0	0	0	0	4	0	0	1	0	0	0	0	0	0
inhibitoryAxonLayer2ApicalDendriteSeeded15	2	0	0	0	0	0	0	0	0	0	0	0	0	0	0	0	0	0	0	0
inhibitoryAxonLayer2ApicalDendriteSeeded16	3	1	0	0	0	0	0	0	0	0	1	1	0	0	0	0	0	0	0	0
inhibitoryAxonLayer2ApicalDendriteSeeded17	1	0	0	1	0	0	0	0	0	0	0	0	0	0	0	0	0	0	0	0
inhibitoryAxonLayer2ApicalDendriteSeeded18	1	0	1	0	0	0	0	0	0	0	1	0	0	0	0	0	0	0	0	0
inhibitoryAxonLayer2ApicalDendriteSeeded19	1	0	0	0	0	0	0	0	0	0	1	0	0	0	0	0	0	0	0	0
inhibitoryAxonLayer2ApicalDendriteSeeded20	0	2	0	0	0	0	0	0	0	0	1	0	0	0	0	0	0	0	0	0
inhibitoryAxonLayer2ApicalDendriteSeeded21	2	1	1	0	0	0	0	0	0	0	1	1	0	0	0	0	0	0	0	0

## Sheet: ACC_MultiInnervationMatrices
treeIndex	L2Apical_ 1	L2Apical_ 2	L2Apical_ 3	L2Apical_ 4	L2Apical_ 5	L2Apical_ 6	L2Apical_ 7	L2Apical_ 8	L2Apical_ 9	L2Apical_10	DeepApical_ 1	DeepApical_ 2	DeepApical_ 3	DeepApical_ 4	DeepApical_ 5	DeepApical_ 6	DeepApical_ 7	DeepApical_ 8	DeepApical_ 9	DeepApical_10
inhibitoryAxonDeepLayerApicalDendriteSeeded01	1	0	0	0	0	0	0	0	0	0	0	0	0	0	0	0	0	0	0	0
inhibitoryAxonDeepLayerApicalDendriteSeeded02	0	0	0	0	0	0	0	0	0	0	1	0	0	0	0	0	0	0	0	0
inhibitoryAxonDeepLayerApicalDendriteSeeded03	2	0	0	0	0	0	0	0	0	0	1	0	1	0	0	0	0	0	0	0
inhibitoryAxonDeepLayerApicalDendriteSeeded04	3	2	0	0	0	0	0	0	0	0	4	0	0	0	0	0	0	0	0	0
inhibitoryAxonDeepLayerApicalDendriteSeeded05	0	0	0	0	0	0	0	0	0	0	1	1	0	0	0	0	0	0	0	0
inhibitoryAxonDeepLayerApicalDendriteSeeded06	0	1	0	0	0	0	0	0	0	0	1	1	0	0	0	0	0	0	0	0
inhibitoryAxonDeepLayerApicalDendriteSeeded07	0	0	0	0	0	0	0	0	0	0	1	1	1	0	0	0	0	0	0	0
inhibitoryAxonDeepLayerApicalDendriteSeeded08	1	0	0	0	0	0	0	0	0	0	0	0	0	0	0	0	0	0	0	0
inhibitoryAxonDeepLayerApicalDendriteSeeded09	0	1	0	0	0	0	0	0	0	0	0	0	0	0	0	0	0	0	0	0
inhibitoryAxonDeepLayerApicalDendriteSeeded10	1	0	0	0	0	0	0	0	0	0	0	0	0	0	0	0	0	0	0	0
inhibitoryAxonDeepLayerApicalDendriteSeeded11	0	0	0	0	0	0	0	0	0	0	0	0	0	0	0	0	0	0	0	0
inhibitoryAxonDeepLayerApicalDendriteSeeded12	1	0	0	0	0	0	0	0	0	0	1	0	0	0	0	0	0	0	0	0
inhibitoryAxonDeepLayerApicalDendriteSeeded13	3	0	0	0	0	0	0	0	0	0	1	0	0	0	0	0	0	0	0	0
inhibitoryAxonDeepLayerApicalDendriteSeeded14	0	1	0	0	0	0	0	0	0	0	10	0	0	0	0	0	0	0	0	0
inhibitoryAxonDeepLayerApicalDendriteSeeded15	3	0	0	0	0	0	0	0	0	0	2	0	0	0	0	0	0	0	0	0
inhibitoryAxonDeepLayerApicalDendriteSeeded16	1	0	0	0	0	0	0	0	0	0	0	0	0	0	0	0	0	0	0	0
inhibitoryAxonDeepLayerApicalDendriteSeeded17	1	0	0	0	0	0	0	0	0	0	1	0	0	0	0	0	0	0	0	0
inhibitoryAxonDeepLayerApicalDendriteSeeded18	3	0	0	0	0	0	0	0	0	0	0	1	0	0	0	0	0	0	0	0
inhibitoryAxonDeepLayerApicalDendriteSeeded19	1	0	0	0	0	0	0	0	0	0	0	0	0	0	0	0	0	0	0	0
inhibitoryAxonDeepLayerApicalDendriteSeeded20	1	0	0	0	0	0	0	0	0	0	1	0	0	0	0	0	0	0	0	0
inhibitoryAxonDeepLayerApicalDendriteSeeded21	3	0	0	0	0	0	0	0	0	0	2	0	0	0	0	0	0	0	0	0
inhibitoryAxonDeepLayerApicalDendriteSeeded22	0	0	0	0	0	0	0	0	0	0	1	0	0	0	0	0	0	0	0	0
inhibitoryAxonDeepLayerApicalDendriteSeeded23	3	0	0	0	0	0	0	0	0	0	1	0	0	0	0	0	0	0	0	0
inhibitoryAxonDeepLayerApicalDendriteSeeded24	4	1	0	0	0	0	0	0	0	0	1	0	0	0	0	0	0	0	0	0
inhibitoryAxonDeepLayerApicalDendriteSeeded25	0	0	0	0	0	0	0	0	0	0	2	1	0	0	0	0	0	0	0	0
inhibitoryAxonDeepLayerApicalDendriteSeeded26	1	0	0	0	0	0	0	0	0	0	0	2	0	0	0	0	0	0	0	0
inhibitoryAxonDeepLayerApicalDendriteSeeded27	2	0	0	0	0	0	0	0	0	0	0	0	0	0	0	0	0	0	0	0
inhibitoryAxonDeepLayerApicalDendriteSeeded28	0	1	0	0	0	0	0	0	0	0	1	0	1	0	0	0	0	0	0	0
inhibitoryAxonDeepLayerApicalDendriteSeeded29	1	0	0	0	0	0	0	0	0	0	1	1	0	0	0	0	0	0	0	0
inhibitoryAxonDeepLayerApicalDendriteSeeded30	0	0	0	0	0	0	0	0	0	0	3	0	0	1	0	0	0	0	0	0
inhibitoryAxonDeepLayerApicalDendriteSeeded31	0	0	0	0	0	0	0	0	0	0	2	0	0	0	0	0	0	0	0	0
inhibitoryAxonDeepLayerApicalDendriteSeeded32	0	0	0	0	0	0	0	0	0	0	3	0	0	0	0	0	0	0	0	0
inhibitoryAxonLayer2ApicalDendriteSeeded01	1	0	0	0	0	0	0	0	0	0	0	0	0	0	0	0	0	0	0	0
inhibitoryAxonLayer2ApicalDendriteSeeded02	1	0	0	0	0	0	0	0	0	0	0	0	0	0	0	0	0	0	0	0
inhibitoryAxonLayer2ApicalDendriteSeeded03	2	0	0	0	0	0	0	0	0	0	2	0	0	0	0	0	0	0	0	0
inhibitoryAxonLayer2ApicalDendriteSeeded04	0	0	0	0	0	0	0	0	0	0	3	0	1	0	0	0	0	0	0	0
inhibitoryAxonLayer2ApicalDendriteSeeded05	1	1	0	0	0	0	0	0	0	0	0	0	0	0	0	0	0	0	0	0
inhibitoryAxonLayer2ApicalDendriteSeeded06	5	1	0	0	0	0	0	0	0	0	0	0	0	0	0	0	0	0	0	0
inhibitoryAxonLayer2ApicalDendriteSeeded07	2	1	0	0	0	0	0	0	0	0	0	0	0	0	0	0	0	0	0	0
inhibitoryAxonLayer2ApicalDendriteSeeded08	2	0	0	0	0	0	0	0	0	0	0	0	0	0	0	0	0	0	0	0
inhibitoryAxonLayer2ApicalDendriteSeeded09	3	0	0	0	0	0	0	0	0	0	0	0	0	0	0	0	0	0	0	0
inhibitoryAxonLayer2ApicalDendriteSeeded10	1	0	0	0	0	0	0	0	0	0	1	0	0	0	0	0	0	0	0	0
inhibitoryAxonLayer2ApicalDendriteSeeded11	1	0	0	0	0	0	0	0	0	0	1	0	0	0	0	0	0	0	0	0
inhibitoryAxonLayer2ApicalDendriteSeeded12	7	1	0	0	0	0	0	0	0	0	1	0	0	0	0	0	0	0	0	0
inhibitoryAxonLayer2ApicalDendriteSeeded13	2	0	0	0	0	0	0	0	0	0	1	0	0	0	0	0	0	0	0	0
inhibitoryAxonLayer2ApicalDendriteSeeded14	0	2	2	1	0	0	0	0	0	0	1	0	0	0	0	0	0	0	0	0
inhibitoryAxonLayer2ApicalDendriteSeeded15	2	0	0	0	0	0	0	0	0	0	1	0	0	0	0	0	0	0	0	0
inhibitoryAxonLayer2ApicalDendriteSeeded16	0	0	0	0	0	0	0	0	0	0	0	0	0	0	0	0	0	0	0	0
inhibitoryAxonLayer2ApicalDendriteSeeded17	0	0	0	0	0	0	0	0	0	0	0	1	0	0	0	0	0	0	0	0
inhibitoryAxonLayer2ApicalDendriteSeeded18	0	1	0	0	0	0	0	0	0	0	0	0	0	0	0	0	0	0	0	0
inhibitoryAxonLayer2ApicalDendriteSeeded19	1	0	0	0	0	0	0	0	0	0	1	1	0	0	0	0	0	0	0	0
inhibitoryAxonLayer2ApicalDendriteSeeded20	0	2	0	0	0	0	0	0	0	0	2	0	0	0	0	0	0	0	0	0
inhibitoryAxonLayer2ApicalDendriteSeeded21	5	1	0	0	0	0	0	0	0	0	0	0	0	0	0	0	0	0	0	0
inhibitoryAxonLayer2ApicalDendriteSeeded22	3	0	0	0	0	0	0	0	0	0	0	0	0	0	0	0	0	0	0	0
inhibitoryAxonLayer2ApicalDendriteSeeded23	1	0	0	0	0	0	0	0	0	0	1	0	0	0	0	0	0	0	0	0
inhibitoryAxonLayer2ApicalDendriteSeeded24	3	0	0	0	0	0	0	0	0	0	1	0	0	0	0	0	0	0	0	0
inhibitoryAxonLayer2ApicalDendriteSeeded25	2	1	1	0	0	0	0	0	0	0	3	0	0	0	0	0	0	0	0	0
inhibitoryAxonLayer2ApicalDendriteSeeded26	1	0	0	0	0	0	0	0	0	0	0	0	0	0	0	0	0	0	0	0
inhibitoryAxonLayer2ApicalDendriteSeeded27	0	0	0	0	0	0	0	0	0	0	2	0	0	0	0	0	0	0	0	0
inhibitoryAxonLayer2ApicalDendriteSeeded28	2	0	0	0	0	0	0	0	0	0	1	0	0	0	0	0	0	0	0	0
inhibitoryAxonLayer2ApicalDendriteSeeded29	1	0	0	0	0	0	0	0	0	0	0	0	0	0	0	0	0	0	0	0
inhibitoryAxonLayer2ApicalDendriteSeeded30	0	1	0	0	0	0	0	0	0	0	0	0	0	0	0	0	0	0	0	0
