# Supplementary material for: Cell-type specific innervation of cortical pyramidal cells at their apical dendrites
Source: eLife. 2020 Feb 28;9:e46876. doi: 10.7554/eLife.46876 (PMC7297530; doi:10.7554/eLife.46876)
Supplement: Figure 5—source data 1. [file elife-46876-fig5-data1.xlsx]

## Sheet: Sheet1
Row	bifurcationDepth	somaDiameter	numObliques	ADTrunkDiameter	featuresNormalized_1	featuresNormalized_2	featuresNormalized_3	featuresNormalized_4	clusters	PCAscores_1	PCAscores_2	PCAscores_3	PCAscores_4	PutativeInhibitory Density	Excitatory Density	putativeInhibitoryFraction
layer5AApicalDendrite_dist2soma01	102.122	14.7743	6	1.6055	-0.917673	-0.0199627	-0.158547	-0.489475	2	-0.775139	-0.548523	-0.45017	0.0536007	0.0734508	0.929785	0.0732139
layer5AApicalDendrite_dist2soma02	140.997	15.2297	6	1.96394	-0.226869	0.169001	-0.158547	-0.034822	2	-0.122211	-0.243757	-0.0612567	-0.168153	0.053693	1.36077	0.0379599
layer5AApicalDendrite_dist2soma03	164.846	14.0958	5	1.50767	0.19693	-0.301466	-0.362394	-0.613565	2	-0.549014	0.523733	-0.125081	-0.214703	0.143343	1.01273	0.123992
layer5AApicalDendrite_dist2soma04	92.3783	15.288	5	1.59231	-1.09083	0.193188	-0.362394	-0.506203	2	-0.863525	-0.774551	-0.48454	-0.185494	0.152972	1.71134	0.0820526
layer5AApicalDendrite_dist2soma05	99.7718	13.2306	5	1.18505	-0.959443	-0.660475	-0.362394	-1.02278	2	-1.48961	-0.112273	-0.494369	0.241315	0.0805195	0.567651	0.124226
layer5AApicalDendrite_dist2soma06	149.063	12.3829	4	0.717334	-0.0835382	-1.01222	-0.566241	-1.61602	2	-1.64598	0.983565	-0.535787	0.00173369	0.0877043	0.791353	0.0997708
layer5AApicalDendrite_dist2soma07	91.5778	13.4996	3	1.43942	-1.10505	-0.548857	-0.770088	-0.700126	2	-1.55361	-0.417692	-0.128813	-0.0288158	0.187839	1.82293	0.0934166
layer5AApicalDendrite_dist2soma08	141.67	12.2567	2	1.87299	-0.214921	-1.06457	-0.973935	-0.150192	2	-1.2209	0.291134	0.758201	0.0196649	0.0518723	0.157744	0.247463
layer5AApicalDendrite_dist2soma09	96.0866	11.6469	2	1.16418	-1.02493	-1.31761	-0.973935	-1.04925	2	-2.18352	0.0952884	0.0406013	0.239886	0.185778	0.450789	0.291844
layer5AApicalDendrite_dist2soma10	120.889	11.6862	1	1.49409	-0.584183	-1.30131	-1.17778	-0.630781	2	-1.86157	0.274675	0.526435	0.0415897	0.0842338	0.447954	0.158278
layer5AApicalDendrite_dist2soma11	100.947	11.4623	0	1.41932	-0.938557	-1.39419	-1.38163	-0.725623	2	-2.23116	0.0554812	0.527228	0.0310469	0.108405	0.203053	0.348057
layer5ApicalDendrite_dist2soma01	288.546	17.3178	16	2.8459	2.39507	1.03545	1.87992	1.08385	1	3.18325	1.14894	-0.0838031	0.239169	0.212867	3.21961	0.0620155
layer5ApicalDendrite_dist2soma02	235.886	19.2077	15	3.21301	1.4593	1.81963	1.67607	1.5495	1	3.25706	-0.128488	-0.132039	-0.0915537	0.226956	3.20575	0.0661157
layer5ApicalDendrite_dist2soma03	215.214	18.0686	14	3.33723	1.09196	1.34695	1.47223	1.70706	1	2.81316	-0.307625	0.213224	0.18485	0.252838	2.47219	0.0927835
layer5ApicalDendrite_dist2soma04	186.279	16.9076	12	2.18746	0.577781	0.865248	1.06453	0.248683	1	1.38951	0.0487337	-0.579069	0.095576	0.146226	1.57924	0.0847458
layer5ApicalDendrite_dist2soma05	156.925	16.2724	11	3.17058	0.056174	0.601666	0.860686	1.49568	1	1.51665	-0.784187	0.468917	0.456014	0.203048	1.21829	0.142857
layer5ApicalDendrite_dist2soma06	203.404	16.8264	8	2.72715	0.882104	0.831554	0.249146	0.933227	1	1.43661	0.0135274	0.396659	-0.425673	0.141133	2.08877	0.0632911
layer5ApicalDendrite_dist2soma07	181.151	16.6491	7	2.40203	0.486661	0.757985	0.0452993	0.520845	1	0.9	-0.117983	0.143665	-0.490054	0.231364	2.22688	0.0941176
