# Supplementary material for: Cell-type specific innervation of cortical pyramidal cells at their apical dendrites
Source: eLife. 2020 Feb 28;9:e46876. doi: 10.7554/eLife.46876 (PMC7297530; doi:10.7554/eLife.46876)
Supplement: Figure 5—source data 2. [file elife-46876-fig5-data2.xlsx]

## Sheet: L5tt_spineDensity
treeIndex	Spine
layer5ApicalDendrite_mapping01	3.21961
layer5ApicalDendrite_mapping02	3.20575
layer5ApicalDendrite_mapping03	2.47219
layer5ApicalDendrite_mapping04	1.57924
layer5ApicalDendrite_mapping05	1.21829
layer5ApicalDendrite_mapping06	2.08877
layer5ApicalDendrite_mapping07	2.22688
layer5ApicalDendrite_mapping01_01	0.416899
layer5ApicalDendrite_mapping02_01	0.826299
layer5ApicalDendrite_mapping02_02	0.813958
layer5ApicalDendrite_mapping03_01	0.589635
layer5ApicalDendrite_mapping03_02	0.860067
layer5ApicalDendrite_mapping03_03	0.778172
layer5ApicalDendrite_mapping04_01	0.646475
layer5ApicalDendrite_mapping04_02	0.744257
layer5ApicalDendrite_mapping04_03	0.655772

## Sheet: L5st_spineDensity
treeIndex	Spine
layer5AApicalDendrite_mapping01	0.919633
layer5AApicalDendrite_mapping02	1.35789
layer5AApicalDendrite_mapping03	0.990917
layer5AApicalDendrite_mapping04	1.6604
layer5AApicalDendrite_mapping05	0.518536
layer5AApicalDendrite_mapping06	0.76563
layer5AApicalDendrite_mapping07	1.72352
layer5AApicalDendrite_mapping08	0.119781
layer5AApicalDendrite_mapping09	0.330072
layer5AApicalDendrite_mapping10	0.392139
layer5AApicalDendrite_mapping11	0.181684
layer5AApicalDendrite_mapping01_01	0.141051
layer5AApicalDendrite_mapping01_02	0.150924
layer5AApicalDendrite_mapping02_01	0.311355
layer5AApicalDendrite_mapping02_02	0.158645
layer5AApicalDendrite_mapping03_01	0.162336
layer5AApicalDendrite_mapping03_02	0.188211
