# Supplementary material for: Cell-type specific innervation of cortical pyramidal cells at their apical dendrites
Source: eLife. 2020 Feb 28;9:e46876. doi: 10.7554/eLife.46876 (PMC7297530; doi:10.7554/eLife.46876)
Supplement: Figure 5—source data 3. [file elife-46876-fig5-data3.xlsx]

## Sheet: SynapseDensity_L2
treeIndex	putative inhibitory	Excitatory
layer2ApicalDendrite_mapping01	0.718182	0.350333
layer2ApicalDendrite_mapping02	0.682887	0.682887
layer2ApicalDendrite_mapping03	0.828994	0.552663
layer2ApicalDendrite_mapping04	0.596289	1.12632
layer2ApicalDendrite_mapping05	0.883438	1.15115
layer2ApicalDendrite_mapping06	0.580447	2.11072
layer2ApicalDendrite_mapping07	0.68426	1.05271
layer2ApicalDendrite_mapping08	0.496176	2.42865
layer2ApicalDendrite_mapping09	0.488653	1.62233
layer2ApicalDendrite_mapping10	0.556339	2.3463

## Sheet: SynapseDensity_L3
treeIndex	putative inhibitory	Excitatory
layer3ApicalDendrite_mapping01	0.145109	2.2637
layer3ApicalDendrite_mapping02	0.0802659	1.71234
layer3ApicalDendrite_mapping03	0.145773	1.45773
layer3ApicalDendrite_mapping04	0.208571	2.44326
layer3ApicalDendrite_mapping05	0.340391	5.31534
layer3ApicalDendrite_mapping06	0.53346	3.88664
layer3ApicalDendrite_mapping07	0.279839	4.00169
layer3ApicalDendrite_mapping08	0.230877	3.66837
layer3ApicalDendrite_mapping09	0.242443	2.45137
layer3ApicalDendrite_mapping10	0.570239	4.56191

## Sheet: SynapseDensity_L5tt
treeIndex	putative inhibitory	Excitatory
layer5ApicalDendrite_mapping01	0.212867	3.21961
layer5ApicalDendrite_mapping02	0.226956	3.20575
layer5ApicalDendrite_mapping03	0.252838	2.47219
layer5ApicalDendrite_mapping04	0.146226	1.57924
layer5ApicalDendrite_mapping05	0.203048	1.21829
layer5ApicalDendrite_mapping06	0.141133	2.08877
layer5ApicalDendrite_mapping07	0.231364	2.22688

## Sheet: SynapseDensity_L2MN
treeIndex	putative inhibitory	Excitatory
layer2MNApicalDendrite_mapping01	0.395578	0.348109
layer2MNApicalDendrite_mapping02	0.656882	1.70789

## Sheet: SynapseDensity_L5st
treeIndex	putative inhibitory_corrected	Excitatory_corrected
layer5AApicalDendrite_mapping01	0.0734508	0.929785
layer5AApicalDendrite_mapping02	0.053693	1.36077
layer5AApicalDendrite_mapping03	0.143343	1.01273
layer5AApicalDendrite_mapping04	0.152972	1.71134
layer5AApicalDendrite_mapping05	0.0805195	0.567651
layer5AApicalDendrite_mapping06	0.0877043	0.791353
layer5AApicalDendrite_mapping07	0.187839	1.82293
layer5AApicalDendrite_mapping08	0.0518723	0.157744
layer5AApicalDendrite_mapping09	0.185778	0.450789
layer5AApicalDendrite_mapping10	0.0842338	0.447954
layer5AApicalDendrite_mapping11	0.108405	0.203053

## Sheet: SynapseFractions_L2
treeIndex	putative inhibitory	Excitatory
layer2ApicalDendrite_mapping01	0.672131	0.327869
layer2ApicalDendrite_mapping02	0.5	0.5
layer2ApicalDendrite_mapping03	0.6	0.4
layer2ApicalDendrite_mapping04	0.346154	0.653846
layer2ApicalDendrite_mapping05	0.434211	0.565789
layer2ApicalDendrite_mapping06	0.215686	0.784314
layer2ApicalDendrite_mapping07	0.393939	0.606061
layer2ApicalDendrite_mapping08	0.169643	0.830357
layer2ApicalDendrite_mapping09	0.231481	0.768519
layer2ApicalDendrite_mapping10	0.191667	0.808333

## Sheet: SynapseFractions_L3
treeIndex	putative inhibitory	Excitatory
layer3ApicalDendrite_mapping01	0.060241	0.939759
layer3ApicalDendrite_mapping02	0.0447761	0.955224
layer3ApicalDendrite_mapping03	0.0909091	0.909091
layer3ApicalDendrite_mapping04	0.0786517	0.921348
layer3ApicalDendrite_mapping05	0.0601852	0.939815
layer3ApicalDendrite_mapping06	0.12069	0.87931
layer3ApicalDendrite_mapping07	0.0653595	0.934641
layer3ApicalDendrite_mapping08	0.0592105	0.940789
layer3ApicalDendrite_mapping09	0.09	0.91
layer3ApicalDendrite_mapping10	0.111111	0.888889

## Sheet: SynapseFractions_L5tt
treeIndex	putative inhibitory	Excitatory
layer5ApicalDendrite_mapping01	0.0620155	0.937984
layer5ApicalDendrite_mapping02	0.0661157	0.933884
layer5ApicalDendrite_mapping03	0.0927835	0.907216
layer5ApicalDendrite_mapping04	0.0847458	0.915254
layer5ApicalDendrite_mapping05	0.142857	0.857143
layer5ApicalDendrite_mapping06	0.0632911	0.936709
layer5ApicalDendrite_mapping07	0.0941176	0.905882

## Sheet: SynapseFractions_L2MN
treeIndex	putative inhibitory	Excitatory
layer2MNApicalDendrite_mapping01	0.531915	0.468085
layer2MNApicalDendrite_mapping02	0.277778	0.722222

## Sheet: SynapseFractions_L5st
treeIndex	putative inhibitory_corrected	Excitatory_orrected
layer5AApicalDendrite_mapping01	0.0732139	0.926786
layer5AApicalDendrite_mapping02	0.0379599	0.96204
layer5AApicalDendrite_mapping03	0.123992	0.876008
layer5AApicalDendrite_mapping04	0.0820526	0.917947
layer5AApicalDendrite_mapping05	0.124226	0.875774
layer5AApicalDendrite_mapping06	0.0997708	0.900229
layer5AApicalDendrite_mapping07	0.0934166	0.906583
layer5AApicalDendrite_mapping08	0.247463	0.752537
layer5AApicalDendrite_mapping09	0.291844	0.708156
layer5AApicalDendrite_mapping10	0.158278	0.841722
layer5AApicalDendrite_mapping11	0.348057	0.651943
