# Supplementary material for: Cell-type specific innervation of cortical pyramidal cells at their apical dendrites
Source: eLife. 2020 Feb 28;9:e46876. doi: 10.7554/eLife.46876 (PMC7297530; doi:10.7554/eLife.46876)
Supplement: Figure 6—source data 1. [file elife-46876-fig6-data1.xlsx]

## Sheet: combinedProp_L2
inhFraction	inhDensity	excDensity	distance2soma
0.672131	0.718182	0.350333	26.0038
0.5	0.682887	0.682887	25.0241
0.6	0.828994	0.552663	31.8926
0.346154	0.596289	1.12632	39.7806
0.434211	0.883438	1.15115	39.423
0.215686	0.580447	2.11072	55.2574
0.393939	0.68426	1.05271	39.2861
0.169643	0.496176	2.42865	75.6961
0.231481	0.488653	1.62233	41.475
0.191667	0.556339	2.3463	61.8427
0.297619	0.516086	1.21796	46.2153
0.316456	0.494756	1.06867	46.5674
0.615385	0.450592	0.28162	34.7154
0.458333	0.27867	0.329338	29.2128
0.183099	0.325751	1.45335	54.0758
0.714286	0.573027	0.229211	39.1333
0.25	0.341499	1.0245	37.1345
0.3125	0.332693	0.731925	37.1493
0.704545	0.71872	0.301399	31.8113
0.386364	0.399247	0.634098	34.7725
0.140845	0.368432	2.24744	92.2979
0.111111	0.297596	2.38076	76.1301
0.190476	0.196827	0.836515	76.0909
0.477273	0.5328	0.583543	39.1485
0.146667	0.35447	2.06237	70.2121
0.167939	0.338951	1.67935	60.8298
0.512821	0.459137	0.43618	34.8769
0.254237	0.328559	0.963772	42.8475
0.105263	0.20487	1.74139	52.6959
0.183673	0.241122	1.07166	70.5378
0.31746	0.342683	0.736769	26.1656
0.390244	0.404984	0.632787	36.7726
0.434783	0.406329	0.528227	26.4146
0.329268	0.458203	0.933377	41.6529
0.444444	0.574948	0.718684	29.989
0.0943396	0.267004	2.56324	58.3809
0.201923	0.534758	2.11357	59.7362
0.122222	0.287616	2.06561	49.8655
0.135802	0.311338	1.98124	89.6262
0.252874	0.42308	1.25001	38.6929
0.555556	0.401863	0.321491	29.5491
0.277778	0.322817	0.839324	33.4246
0.351064	0.784624	1.45037	42.8453
0.666667	0.553397	0.276698	23.2144
0.278481	0.462217	1.19756	47.8446
0.384615	0.462437	0.739899	32.8367
0.574074	0.679366	0.504046	33.4917
0.130435	0.300591	2.00394	51.0087
0.298507	0.477068	1.12111	47.9852
0.3625	0.74513	1.3104	35.7567
0.658537	0.476371	0.247007	30.4987

## Sheet: combinedProp_L3
inhFraction	inhDensity	excDensity	distance2soma
0.060241	0.145109	2.2637	182.284
0.0447761	0.0802659	1.71234	206.824
0.0909091	0.145773	1.45773	192.259
0.0786517	0.208571	2.44326	159.618
0.0601852	0.340391	5.31534	204.241
0.12069	0.53346	3.88664	126.798
0.0653595	0.279839	4.00169	156.972
0.0592105	0.230877	3.66837	177.995
0.09	0.242443	2.45137	195.417
0.111111	0.570239	4.56191	114.824

## Sheet: combinedProp_L5tt
inhFraction	inhDensity	excDensity	distance2soma
0.0620155	0.212867	3.21961	282.931
0.0661157	0.226956	3.20575	313.221
0.0927835	0.252838	2.47219	374.058
0.0847458	0.146226	1.57924	347.09
0.142857	0.203048	1.21829	425.451
0.0632911	0.141133	2.08877	370.673
0.0941176	0.231364	2.22688	364.644

## Sheet: combinedProp_L2MN
inhFraction	inhDensity	excDensity	distance2soma
0.531915	0.395578	0.348109	25.086
0.277778	0.656882	1.70789	41.893

## Sheet: combinedProp_L5st
inhFraction	inhDensity	excDensity	distance2soma
0.0732139	0.0734508	0.929785	467.597
0.0379599	0.053693	1.36077	409.594
0.123992	0.143343	1.01273	382.104
0.0820526	0.152972	1.71134	443.872
0.124226	0.0805195	0.567651	525.804
0.0997708	0.0877043	0.791353	433.613
0.0934166	0.187839	1.82293	428.435
0.247463	0.0518723	0.157744	495.488
0.291844	0.185778	0.450789	544.954
0.158278	0.0842338	0.447954	417.652
0.348057	0.108405	0.203053	460.231
