# Supplementary material for: Cell-type specific innervation of cortical pyramidal cells at their apical dendrites
Source: eLife. 2020 Feb 28;9:e46876. doi: 10.7554/eLife.46876 (PMC7297530; doi:10.7554/eLife.46876)
Supplement: Figure 6—source data 2. [file elife-46876-fig6-data2.xlsx]

## Sheet: S1_InhibitoryFraction
Row	layer2ApicalDendrite01	layer2ApicalDendrite02	layer2ApicalDendrite03	layer2ApicalDendrite04	layer2ApicalDendrite05	layer2ApicalDendrite06	layer2ApicalDendrite07	layer2ApicalDendrite10	layer2ApicalDendrite_whole01	layer2ApicalDendrite_whole02
5um
15um									1	0.928571
25um			1	1				1	0.785714	1
35um	1	0.666667	0.875	0.333333		1	0.416667	0.428571	0.233333	0.909091
45um	0.611111	0.47619	0.307692	0.25	0	0.642857	0.2	0.24	0.12	0.378378
55um	0.147541	0.234043			0.36	0.25	0.25		0.0884354	0.117647
65um		0			0.102564				0.0666667	0.111111
75um									0.0416667	0.09375
85um									0.0446429	0.0263158
95um									0.064	0.08
105um									0.0729167	0.0555556
115um									0.0232558	0.1
125um									0.0526316	0.0294118
135um									0.0833333	0.0909091
145um									0	0.037037
155um										0.0526316
165um										0
175um										0.153846
185um										0
195um										0
205um										0
215um
225um
235um
245um
255um
265um
275um
285um
295um
305um
315um
325um

## Sheet: V2_InhibitoryFraction
Row	layer2ApicalDendrite01	layer2ApicalDendrite02	layer2ApicalDendrite03	layer2ApicalDendrite04	layer2ApicalDendrite05	layer2ApicalDendrite06	layer2ApicalDendrite08	layer2ApicalDendrite09	layer2ApicalDendrite_whole01	layer2ApicalDendrite_whole02
5um
15um									1	0.857143
25um									0.857143	0.875
35um				0.875			0.125		0.818182	0.454545
45um				0.392857			0.347826	0.0909091	0.40625	0.269231
55um				0.375		0.235294	0.214286	0.15	0.171053	0.170213
65um		0.125	0		0.26087	0.181818		0.04	0.168067	0.203704
75um		0.157895	0.125		0.0961538	0.108108			0.0982659	0.0704225
85um	0.185185	0.0754717	0.272727						0.0434783	0.1
95um	0.113636								0.0491803	0
105um									0.0465116	0.108108
115um									0.0384615	0.125
125um									0.0454545	0.133333
135um									0	0.0714286
145um										0.230769
155um										0.214286
165um										0.166667
175um
185um
195um
205um
215um
225um
235um
245um
255um
265um
275um
285um
295um
305um
315um
325um

## Sheet: PPC_InhibitoryFraction
Row	layer2ApicalDendrite01	layer2ApicalDendrite02	layer2ApicalDendrite03	layer2ApicalDendrite04	layer2ApicalDendrite05	layer2ApicalDendrite06	layer2ApicalDendrite08	layer2ApicalDendrite09	layer2ApicalDendrite10	layer2ApicalDendrite_whole01	layer2ApicalDendrite_whole02
5um
15um	0.666667									1	0.947368
25um	0.6		0.666667		0.625					0.888889	0.642857
35um	0.344828	0.666667	0.5	1	0.405405				0.5	0.55	0.15625
45um	0.130435	0.333333	0.153846	0.421053		0	0.09375		0.191489	0.282609	0.2
55um		0		0.236842		0.2	0.133333		0.111111	0.130435	0.0806452
65um				0.0625		0.0724638	0.153846			0.166667	0.141593
75um						0		0.75		0.115942	0.0933333
85um								0.0909091		0.134328	0.0648649
95um								0.108108		0.127273	0.0599078
105um								0.142857		0.2	0.0706522
115um										0	0.0698925
125um										0	0.0941176
135um											0.12963
145um											0.0833333
155um											0.230769
165um											0
175um
185um
195um
205um
215um
225um
235um
245um
255um
265um
275um
285um
295um
305um
315um
325um

## Sheet: ACC_InhibitoryFraction
Row	layer2ApicalDendrite01	layer2ApicalDendrite02	layer2ApicalDendrite03	layer2ApicalDendrite04	layer2ApicalDendrite05	layer2ApicalDendrite06	layer2ApicalDendrite07	layer2ApicalDendrite08	layer2ApicalDendrite09	layer2ApicalDendrite10	layer2ApicalDendrite11	layer2ApicalDendrite_whole01	layer2ApicalDendrite_whole02	layer2ApicalDendrite_whole03
5um
15um				1							1	0.846154	0.952381	1
25um	0.625			0.909091		1	0.833333			0.5	1	1	0.818182	1
35um	0.526316	0.529412	0.6875	0.294118		0.411765	0.8125		1	0.384615	0.5	0.666667	0.888889	0.727273
45um		0.162162	0.384615		0.5	0.208333	0.423077	0.133333	0.428571	0.333333	0.272727	0.272727	0.636364	0.28125
55um			0.179487		0.225	0.25	0.333333	0.125	0.212121	0.375		0.142857	0.411765	0.135135
65um					0.157895			0.136364	0.1875			0.148148	0.24	0.131579
75um												0.123967	0.121739	0.125
85um												0.109244	0.127273	0.15493
95um												0.047619	0.079646	0.12
105um												0.075188	0.0526316	0.0289855
115um												0.0675676	0.0625	0.0517241
125um												0.105634	0.0833333	0.0517241
135um												0.023622	0.0357143	0.0535714
145um												0.0267857	0.102041	0.0434783
155um												0.0816327	0.0769231	0.130435
165um												0	0.142857	0.0666667
175um														0.105263
185um														0.176471
195um														0.117647
205um														0.0909091
215um
225um
235um
245um
255um
265um
275um
285um
295um
305um
315um
325um

## Sheet: PPC2_InhibitoryFraction
Row	layer2ApicalDendrite_mapping01	layer2ApicalDendrite_mapping02	layer2ApicalDendrite_mapping03	layer2ApicalDendrite_mapping04	layer2ApicalDendrite_mapping05	layer2ApicalDendrite_mapping06	layer2ApicalDendrite_mapping07	layer2ApicalDendrite_mapping08	layer2ApicalDendrite_mapping09	layer2ApicalDendrite_mapping10	layer2MNApicalDendrite_mapping01	layer2MNApicalDendrite_mapping02
5um
15um	0.888889	1
25um	1	1	0.9								0.866667
35um	0.55814	0.4	0.625	0.733333	0.777778		0.5		0.333333		0.5	0.470588
45um		0.166667	0.409091	0.275862	0.292683	0.3	0.419355		0.229508		0.166667	0.272727
55um				0.235294	0.411765	0.222222	0.263158		0.172414	0.411765		0.2
65um						0.169492		0.428571		0.1875
75um						0.5		0.195122		0.127273
85um								0.133333
95um								0
105um
115um
125um
135um
145um
155um
165um
175um
185um
195um
205um
215um
225um
235um
245um
255um
265um
275um
285um
295um
305um
315um
325um

## Sheet: LPtA_InhibitoryFraction
Row	layer2ApicalDendrite_mapping01_01	layer2ApicalDendrite_mapping02_01	layer2ApicalDendrite_mapping03_01	layer2ApicalDendrite_mapping03_02	layer2ApicalDendrite_mapping04_01	layer2ApicalDendrite_mapping04_02	layer2ApicalDendrite_mapping04_03	layer2ApicalDendrite_mapping04_04	layer2ApicalDendrite_mapping04_05
5um
15um
25um
35um
45um
55um
65um
75um
85um
95um
105um
115um
125um
135um
145um
155um
165um
175um
185um
195um					0.125
205um				0.0416667	0.121212
215um	0.0625			0.0384615	0.148148	0.0344828	0.0384615		0
225um	0.107143	0		0.115385	0	0.133333	0.0666667		0.142857
235um	0.0344828	0.0833333	0.0714286	0.166667	0.136364	0.173913		0.166667
245um	0.142857	0.0833333	0.125		0.166667	0.217391
255um	0.1	0.142857	0.12		0.0714286	0.0322581
265um	0.0333333	0.0769231	0.222222		0.1	0.2
275um	0.121212	0.0789474	0.210526		0.25	0.148148
285um	0.125	0.117647	0.214286		0.142857	0.133333
295um	0.16129	0.206897	0.181818		0.157895	0
305um	0.162162	0.142857	0.181818		0.5
315um	0.09375	0.25	0.285714
325um	0.111111
