# Supplementary material for: Cell-type specific innervation of cortical pyramidal cells at their apical dendrites
Source: eLife. 2020 Feb 28;9:e46876. doi: 10.7554/eLife.46876 (PMC7297530; doi:10.7554/eLife.46876)
Supplement: Figure 7—source data 1. [file elife-46876-fig7-data1.xlsx]

## Sheet: L2
treeIndex	pInh_Density	Exc_Density	pInh_Fraction	Exc_Fraction
layer2ApicalDendrite_mapping01_01	0.237502	1.95779	0.108187	0.891813
layer2ApicalDendrite_mapping02_01	0.199428	1.50603	0.116935	0.883065
layer2ApicalDendrite_mapping03_01	0.389499	1.83294	0.175258	0.824742
layer2ApicalDendrite_mapping03_02	0.192158	2.22355	0.0795455	0.920455
layer2ApicalDendrite_mapping04_01	0.290086	1.98528	0.12749	0.87251
layer2ApicalDendrite_mapping04_02	0.26515	1.84585	0.125604	0.874396
layer2ApicalDendrite_mapping04_03	0.142885	2.78626	0.0487805	0.95122
layer2ApicalDendrite_mapping04_04	0.192879	0.964395	0.166667	0.833333
layer2ApicalDendrite_mapping04_05	0.128737	1.54485	0.0769231	0.923077

## Sheet: L3
treeIndex	pInh_Density	Exc_Density	pInh_Fraction	Exc_Fraction
layer3ApicalDendrite_mapping01_01	0.177464	1.09356	0.139623	0.860377
layer3ApicalDendrite_mapping02_01	0.285191	1.94881	0.12766	0.87234
layer3ApicalDendrite_mapping02_02	0.156815	1.70536	0.0842105	0.915789
layer3ApicalDendrite_mapping03_01	0.243	1.89879	0.113456	0.886544
layer3ApicalDendrite_mapping03_02	0.210814	2.14187	0.0896057	0.910394
layer3ApicalDendrite_mapping03_03	0.165157	1.92934	0.078853	0.921147
layer3ApicalDendrite_mapping03_04	0.241958	2.70993	0.0819672	0.918033

## Sheet: L5tt
treeIndex	pInh_Density	Exc_Density	pInh_Fraction	Exc_Fraction
layer5ApicalDendrite_mapping01_01	0.212383	0.416899	0.3375	0.6625
layer5ApicalDendrite_mapping02_01	0.237112	0.826299	0.222973	0.777027
layer5ApicalDendrite_mapping02_02	0.163963	0.813958	0.167665	0.832335
layer5ApicalDendrite_mapping03_01	0.145141	0.589635	0.197531	0.802469
layer5ApicalDendrite_mapping03_02	0.195965	0.860067	0.185567	0.814433
layer5ApicalDendrite_mapping03_03	0.240526	0.778172	0.236111	0.763889
layer5ApicalDendrite_mapping04_01	0.210756	0.646475	0.245856	0.754144
layer5ApicalDendrite_mapping04_02	0.16539	0.744257	0.181818	0.818182
layer5ApicalDendrite_mapping04_03	0.218591	0.655772	0.25	0.75

## Sheet: L5st
treeIndex	pInh_Density_corrected	Exc_Density_corrected	pInh_Fraction_corrected	Exc_Fraction_corrected
layer5AApicalDendrite_mapping01_01	0.103437	0.272699	0.275	0.725
layer5AApicalDendrite_mapping01_02	0.13885	0.253553	0.353846	0.646154
layer5AApicalDendrite_mapping02_01	0.223138	0.438492	0.337255	0.662745
layer5AApicalDendrite_mapping02_02	0.0867258	0.262293	0.248485	0.751515
layer5AApicalDendrite_mapping03_01	0.113635	0.251621	0.311111	0.688889
layer5AApicalDendrite_mapping03_02	0.173155	0.316195	0.353846	0.646154
