# Supplementary material for: Cell-type specific innervation of cortical pyramidal cells at their apical dendrites
Source: eLife journal article supplement (doi:10.7554/elife.46876), 2020-02-28
Supplement: supp [file elife_poa_e46876_Figure_2_source_data_1.xlsx]

## Sheet: Sheet1
treeIndex	Spine	Shaft	SpineRatio	ShaftRatio		Axon Info.
deepLayerApicalDendriteSeeded01	0	5	0	1		Region	AD seed type
deepLayerApicalDendriteSeeded02	1	5	0.166667	0.833333		L1	Shaft of L5tt AD
deepLayerApicalDendriteSeeded03	0	5	0	1
deepLayerApicalDendriteSeeded04	0	5	0	1
deepLayerApicalDendriteSeeded05	0	5	0	1
deepLayerApicalDendriteSeeded06	4	4	0.5	0.5
deepLayerApicalDendriteSeeded07	0	5	0	1
deepLayerApicalDendriteSeeded08	5	0	1	0
deepLayerApicalDendriteSeeded09	1	4	0.2	0.8
deepLayerApicalDendriteSeeded10	4	1	0.8	0.2
deepLayerApicalDendriteSeeded11	2	7	0.222222	0.777778
deepLayerApicalDendriteSeeded12	0	3	0	1
deepLayerApicalDendriteSeeded13	5	6	0.454545	0.545455
deepLayerApicalDendriteSeeded14	0	5	0	1
deepLayerApicalDendriteSeeded15	1	4	0.2	0.8
deepLayerApicalDendriteSeeded16	0	4	0	1
deepLayerApicalDendriteSeeded17	2	6	0.25	0.75
deepLayerApicalDendriteSeeded18	4	1	0.8	0.2
deepLayerApicalDendriteSeeded19	4	3	0.571429	0.428571
deepLayerApicalDendriteSeeded20	0	5	0	1
deepLayerApicalDendriteSeeded21	0	5	0	1
deepLayerApicalDendriteSeeded22	0	5	0	1
deepLayerApicalDendriteSeeded23	4	1	0.8	0.2
deepLayerApicalDendriteSeeded24	0	5	0	1
deepLayerApicalDendriteSeeded25	0	5	0	1
deepLayerApicalDendriteSeeded26	0	3	0	1
deepLayerApicalDendriteSeeded27	0	5	0	1
deepLayerApicalDendriteSeeded28	1	3	0.25	0.75
deepLayerApicalDendriteSeeded29	1	6	0.142857	0.857143
deepLayerApicalDendriteSeeded30	5	0	1	0
deepLayerApicalDendriteSeeded31	5	0	1	0
deepLayerApicalDendriteSeeded32	4	1	0.8	0.2
deepLayerApicalDendriteSeeded33	0	5	0	1
deepLayerApicalDendriteSeeded34	0	6	0	1
deepLayerApicalDendriteSeeded35	0	5	0	1
deepLayerApicalDendriteSeeded36	0	5	0	1
deepLayerApicalDendriteSeeded37	7	1	0.875	0.125
deepLayerApicalDendriteSeeded38	0	6	0	1
deepLayerApicalDendriteSeeded39	1	6	0.142857	0.857143
deepLayerApicalDendriteSeeded40	1	5	0.166667	0.833333
treeIndex	Spine	Shaft	SpineRatio	ShaftRatio		Axon Info.
layer2ApicalDendriteSeeded01	0	6	0	1		Region	AD seed type
layer2ApicalDendriteSeeded02	1	5	0.166667	0.833333		L1	Shaft of L2 AD
layer2ApicalDendriteSeeded03	0	5	0	1
layer2ApicalDendriteSeeded04	0	5	0	1
layer2ApicalDendriteSeeded05	0	3	0	1
layer2ApicalDendriteSeeded06	0	5	0	1
layer2ApicalDendriteSeeded07	0	5	0	1
layer2ApicalDendriteSeeded08	1	4	0.2	0.8
layer2ApicalDendriteSeeded09	0	6	0	1
layer2ApicalDendriteSeeded10	6	11	0.352941	0.647059
layer2ApicalDendriteSeeded11	7	3	0.7	0.3
layer2ApicalDendriteSeeded12	0	6	0	1
layer2ApicalDendriteSeeded13	6	0	1	0
layer2ApicalDendriteSeeded14	0	5	0	1
treeIndex	Spine	Shaft	SpineRatio	ShaftRatio		Axon Info.
layer3ApicalDendriteSeeded01	0	5	0	1		Region	AD seed type
layer3ApicalDendriteSeeded02	5	1	0.833333	0.166667		L1	Shaft of L3 AD
layer3ApicalDendriteSeeded03	0	5	0	1
layer3ApicalDendriteSeeded04	0	5	0	1
layer3ApicalDendriteSeeded05	0	5	0	1
layer3ApicalDendriteSeeded06	0	5	0	1
layer3ApicalDendriteSeeded07	0	5	0	1
layer3ApicalDendriteSeeded08	0	5	0	1
layer3ApicalDendriteSeeded09	0	6	0	1
layer3ApicalDendriteSeeded10	0	5	0	1
layer3ApicalDendriteSeeded11	0	5	0	1
layer3ApicalDendriteSeeded12	1	5	0.166667	0.833333
layer3ApicalDendriteSeeded13	1	5	0.166667	0.833333
layer3ApicalDendriteSeeded14	0	2	0	1
layer3ApicalDendriteSeeded15	0	6	0	1
layer3ApicalDendriteSeeded16	0	6	0	1
layer3ApicalDendriteSeeded17	0	4	0	1
layer3ApicalDendriteSeeded18	0	5	0	1
layer3ApicalDendriteSeeded19	0	5	0	1
layer3ApicalDendriteSeeded20	0	5	0	1
layer3ApicalDendriteSeeded21	0	6	0	1
layer3ApicalDendriteSeeded22	0	5	0	1
layer3ApicalDendriteSeeded23	1	5	0.166667	0.833333
layer3ApicalDendriteSeeded24	0	5	0	1
layer3ApicalDendriteSeeded25	0	3	0	1
layer3ApicalDendriteSeeded26	2	6	0.25	0.75
layer3ApicalDendriteSeeded27	0	5	0	1
treeIndex	Spine	Shaft	SpineRatio	ShaftRatio		Axon Info.
axon01	0	6	0	1		Region	AD seed type
axon02	6	0	1	0		L1	Shaft of L5st AD
axon03	6	0	1	0
axon04	11	14	0.44	0.56
axon05	5	2	0.714286	0.285714
axon06	0	6	0	1
axon07	5	4	0.555556	0.444444
axon08	5	1	0.833333	0.166667
axon09	7	3	0.7	0.3
axon10	0	6	0	1
treeIndex	Spine	Shaft	SpineRatio	ShaftRatio		Axon Info.
deepLayerApicalDendriteSeeded01	5	0	1	0		Region	AD seed type
deepLayerApicalDendriteSeeded02	5	0	1	0		L1	Spine of L5tt AD
deepLayerApicalDendriteSeeded03	5	0	1	0
deepLayerApicalDendriteSeeded04	5	1	0.833333	0.166667
deepLayerApicalDendriteSeeded05	5	0	1	0
deepLayerApicalDendriteSeeded06	3	1	0.75	0.25
deepLayerApicalDendriteSeeded07	5	0	1	0
deepLayerApicalDendriteSeeded08	5	0	1	0
deepLayerApicalDendriteSeeded09	5	0	1	0
deepLayerApicalDendriteSeeded10	2	2	0.5	0.5
deepLayerApicalDendriteSeeded11	5	0	1	0
deepLayerApicalDendriteSeeded12	3	2	0.6	0.4
deepLayerApicalDendriteSeeded13	5	0	1	0
deepLayerApicalDendriteSeeded14	5	0	1	0
deepLayerApicalDendriteSeeded15	6	0	1	0
deepLayerApicalDendriteSeeded16	5	0	1	0
deepLayerApicalDendriteSeeded17	4	0	1	0
deepLayerApicalDendriteSeeded18	5	0	1	0
deepLayerApicalDendriteSeeded19	7	3	0.7	0.3
deepLayerApicalDendriteSeeded20	4	0	1	0
deepLayerApicalDendriteSeeded21	3	0	1	0
deepLayerApicalDendriteSeeded22	5	0	1	0
deepLayerApicalDendriteSeeded23	6	0	1	0
deepLayerApicalDendriteSeeded24	5	0	1	0
deepLayerApicalDendriteSeeded25	0	3	0	1
deepLayerApicalDendriteSeeded26	2	4	0.333333	0.666667
deepLayerApicalDendriteSeeded27	3	0	1	0
deepLayerApicalDendriteSeeded28	5	0	1	0
deepLayerApicalDendriteSeeded29	5	0	1	0
deepLayerApicalDendriteSeeded30	4	1	0.8	0.2
treeIndex	Spine	Shaft	SpineRatio	ShaftRatio		Axon Info.
layer2ApicalDendriteSeeded01	5	0	1	0		Region	AD seed type
layer2ApicalDendriteSeeded02	5	0	1	0		L1	Spine of L2 AD
layer2ApicalDendriteSeeded03	5	0	1	0
layer2ApicalDendriteSeeded04	4	1	0.8	0.2
layer2ApicalDendriteSeeded05	5	0	1	0
treeIndex	Spine	Shaft	SpineRatio	ShaftRatio		Axon Info.
layer3ApicalDendriteSeeded01	5	0	1	0		Region	AD seed type
layer3ApicalDendriteSeeded02	5	0	1	0		L1	Spine of L3 AD
layer3ApicalDendriteSeeded03	5	0	1	0
layer3ApicalDendriteSeeded04	5	0	1	0
layer3ApicalDendriteSeeded05	4	1	0.8	0.2
layer3ApicalDendriteSeeded06	4	1	0.8	0.2
layer3ApicalDendriteSeeded07	5	0	1	0
layer3ApicalDendriteSeeded08	5	0	1	0
layer3ApicalDendriteSeeded09	5	0	1	0
layer3ApicalDendriteSeeded10	3	1	0.75	0.25
layer3ApicalDendriteSeeded11	4	0	1	0
layer3ApicalDendriteSeeded12	5	0	1	0
layer3ApicalDendriteSeeded13	4	0	1	0
layer3ApicalDendriteSeeded14	5	0	1	0
layer3ApicalDendriteSeeded15	5	0	1	0
layer3ApicalDendriteSeeded16	5	0	1	0
treeIndex	Shaft	Spine	SpineRatio	ShaftRatio		Axon Info.
inhibitoryAxonDeepLayerApicalDendriteSeeded01	60	3	0.047619	0.952381		Region	AD seed type
inhibitoryAxonDeepLayerApicalDendriteSeeded02	12	0	0	1		L2	Shaft of DL AD
inhibitoryAxonDeepLayerApicalDendriteSeeded03	43	0	0	1
inhibitoryAxonDeepLayerApicalDendriteSeeded04	28	0	0	1
inhibitoryAxonDeepLayerApicalDendriteSeeded05	22	0	0	1
inhibitoryAxonDeepLayerApicalDendriteSeeded06	18	0	0	1
inhibitoryAxonDeepLayerApicalDendriteSeeded07	33	0	0	1
inhibitoryAxonDeepLayerApicalDendriteSeeded08	22	0	0	1
inhibitoryAxonDeepLayerApicalDendriteSeeded09	41	1	0.0238095	0.97619
inhibitoryAxonDeepLayerApicalDendriteSeeded10	29	1	0.0333333	0.966667
inhibitoryAxonDeepLayerApicalDendriteSeeded11	14	0	0	1
inhibitoryAxonDeepLayerApicalDendriteSeeded12	14	0	0	1
inhibitoryAxonDeepLayerApicalDendriteSeeded13	20	1	0.047619	0.952381
inhibitoryAxonDeepLayerApicalDendriteSeeded14	19	0	0	1
inhibitoryAxonDeepLayerApicalDendriteSeeded15	15	0	0	1
inhibitoryAxonDeepLayerApicalDendriteSeeded16	29	0	0	1
inhibitoryAxonDeepLayerApicalDendriteSeeded17	17	0	0	1
inhibitoryAxonDeepLayerApicalDendriteSeeded18	9	0	0	1
inhibitoryAxonDeepLayerApicalDendriteSeeded19	103	0	0	1
inhibitoryAxonDeepLayerApicalDendriteSeeded01	31	0	0	1
inhibitoryAxonDeepLayerApicalDendriteSeeded02	2	10	0.833333	0.166667
inhibitoryAxonDeepLayerApicalDendriteSeeded03	22	0	0	1
inhibitoryAxonDeepLayerApicalDendriteSeeded04	3	0	0	1
inhibitoryAxonDeepLayerApicalDendriteSeeded05	26	1	0.037037	0.962963
inhibitoryAxonDeepLayerApicalDendriteSeeded06	12	0	0	1
inhibitoryAxonDeepLayerApicalDendriteSeeded07	88	0	0	1
inhibitoryAxonDeepLayerApicalDendriteSeeded08	61	6	0.0895522	0.910448
inhibitoryAxonDeepLayerApicalDendriteSeeded09	11	4	0.266667	0.733333
inhibitoryAxonDeepLayerApicalDendriteSeeded10	7	1	0.125	0.875
inhibitoryAxonDeepLayerApicalDendriteSeeded11	54	0	0	1
inhibitoryAxonDeepLayerApicalDendriteSeeded12	14	0	0	1
inhibitoryAxonDeepLayerApicalDendriteSeeded13	105	3	0.0277778	0.972222
inhibitoryAxonDeepLayerApicalDendriteSeeded14	122	1	0.00813008	0.99187
inhibitoryAxonDeepLayerApicalDendriteSeeded15	62	1	0.015873	0.984127
inhibitoryAxonDeepLayerApicalDendriteSeeded16	5	1	0.166667	0.833333
inhibitoryAxonDeepLayerApicalDendriteSeeded17	51	0	0	1
inhibitoryAxonDeepLayerApicalDendriteSeeded18	15	0	0	1
inhibitoryAxonDeepLayerApicalDendriteSeeded19	25	1	0.0384615	0.961538
inhibitoryAxonDeepLayerApicalDendriteSeeded20	25	0	0	1
inhibitoryAxonDeepLayerApicalDendriteSeeded01	12	0	0	1
inhibitoryAxonDeepLayerApicalDendriteSeeded02	7	0	0	1
inhibitoryAxonDeepLayerApicalDendriteSeeded03	23	0	0	1
inhibitoryAxonDeepLayerApicalDendriteSeeded04	6	0	0	1
inhibitoryAxonDeepLayerApicalDendriteSeeded05	19	0	0	1
inhibitoryAxonDeepLayerApicalDendriteSeeded06	73	2	0.0266667	0.973333
inhibitoryAxonDeepLayerApicalDendriteSeeded07	10	0	0	1
inhibitoryAxonDeepLayerApicalDendriteSeeded08	22	0	0	1
inhibitoryAxonDeepLayerApicalDendriteSeeded09	11	4	0.266667	0.733333
inhibitoryAxonDeepLayerApicalDendriteSeeded10	14	0	0	1
inhibitoryAxonDeepLayerApicalDendriteSeeded11	4	0	0	1
inhibitoryAxonDeepLayerApicalDendriteSeeded12	11	1	0.0833333	0.916667
inhibitoryAxonDeepLayerApicalDendriteSeeded13	44	1	0.0222222	0.977778
inhibitoryAxonDeepLayerApicalDendriteSeeded14	2	0	0	1
inhibitoryAxonDeepLayerApicalDendriteSeeded15	35	0	0	1
inhibitoryAxonDeepLayerApicalDendriteSeeded16	18	0	0	1
inhibitoryAxonDeepLayerApicalDendriteSeeded17	10	0	0	1
inhibitoryAxonDeepLayerApicalDendriteSeeded18	26	0	0	1
inhibitoryAxonDeepLayerApicalDendriteSeeded19	8	0	0	1
inhibitoryAxonDeepLayerApicalDendriteSeeded20	76	0	0	1
inhibitoryAxonDeepLayerApicalDendriteSeeded01	12	0	0	1
inhibitoryAxonDeepLayerApicalDendriteSeeded02	38	0	0	1
inhibitoryAxonDeepLayerApicalDendriteSeeded03	42	0	0	1
inhibitoryAxonDeepLayerApicalDendriteSeeded04	90	0	0	1
inhibitoryAxonDeepLayerApicalDendriteSeeded05	18	0	0	1
inhibitoryAxonDeepLayerApicalDendriteSeeded06	16	0	0	1
inhibitoryAxonDeepLayerApicalDendriteSeeded07	10	1	0.0909091	0.909091
inhibitoryAxonDeepLayerApicalDendriteSeeded08	15	0	0	1
inhibitoryAxonDeepLayerApicalDendriteSeeded09	18	0	0	1
inhibitoryAxonDeepLayerApicalDendriteSeeded10	9	0	0	1
inhibitoryAxonDeepLayerApicalDendriteSeeded11	8	0	0	1
inhibitoryAxonDeepLayerApicalDendriteSeeded12	7	0	0	1
inhibitoryAxonDeepLayerApicalDendriteSeeded13	19	0	0	1
inhibitoryAxonDeepLayerApicalDendriteSeeded14	403	2	0.00493827	0.995062
inhibitoryAxonDeepLayerApicalDendriteSeeded15	37	0	0	1
inhibitoryAxonDeepLayerApicalDendriteSeeded16	36	1	0.027027	0.972973
inhibitoryAxonDeepLayerApicalDendriteSeeded17	18	0	0	1
inhibitoryAxonDeepLayerApicalDendriteSeeded18	41	2	0.0465116	0.953488
inhibitoryAxonDeepLayerApicalDendriteSeeded19	9	0	0	1
inhibitoryAxonDeepLayerApicalDendriteSeeded20	10	0	0	1
inhibitoryAxonDeepLayerApicalDendriteSeeded21	32	0	0	1
inhibitoryAxonDeepLayerApicalDendriteSeeded22	18	1	0.0526316	0.947368
inhibitoryAxonDeepLayerApicalDendriteSeeded23	16	0	0	1
inhibitoryAxonDeepLayerApicalDendriteSeeded24	41	0	0	1
inhibitoryAxonDeepLayerApicalDendriteSeeded25	22	0	0	1
inhibitoryAxonDeepLayerApicalDendriteSeeded26	50	0	0	1
inhibitoryAxonDeepLayerApicalDendriteSeeded27	11	0	0	1
inhibitoryAxonDeepLayerApicalDendriteSeeded28	12	2	0.142857	0.857143
inhibitoryAxonDeepLayerApicalDendriteSeeded29	17	0	0	1
inhibitoryAxonDeepLayerApicalDendriteSeeded30	25	0	0	1
inhibitoryAxonDeepLayerApicalDendriteSeeded31	15	0	0	1
inhibitoryAxonDeepLayerApicalDendriteSeeded32	24	0	0	1
treeIndex	Shaft	Spine	SpineRatio	ShaftRatio		Axon Info.
inhibitoryAxonLayer2ApicalDendriteSeeded01	28	1	0.0344828	0.965517		Region	AD seed type
inhibitoryAxonLayer2ApicalDendriteSeeded02	31	0	0	1		L2	Shaft of L2 AD
inhibitoryAxonLayer2ApicalDendriteSeeded03	96	1	0.0103093	0.989691
inhibitoryAxonLayer2ApicalDendriteSeeded04	9	0	0	1
inhibitoryAxonLayer2ApicalDendriteSeeded05	62	0	0	1
inhibitoryAxonLayer2ApicalDendriteSeeded06	10	0	0	1
inhibitoryAxonLayer2ApicalDendriteSeeded07	34	0	0	1
inhibitoryAxonLayer2ApicalDendriteSeeded08	51	0	0	1
inhibitoryAxonLayer2ApicalDendriteSeeded09	83	0	0	1
inhibitoryAxonLayer2ApicalDendriteSeeded10	18	0	0	1
inhibitoryAxonLayer2ApicalDendriteSeeded11	79	1	0.0125	0.9875
inhibitoryAxonLayer2ApicalDendriteSeeded12	42	0	0	1
inhibitoryAxonLayer2ApicalDendriteSeeded13	8	0	0	1
inhibitoryAxonLayer2ApicalDendriteSeeded14	63	0	0	1
inhibitoryAxonLayer2ApicalDendriteSeeded15	34	0	0	1
inhibitoryAxonLayer2ApicalDendriteSeeded16	21	0	0	1
inhibitoryAxonLayer2ApicalDendriteSeeded17	88	0	0	1
inhibitoryAxonLayer2ApicalDendriteSeeded18	10	0	0	1
inhibitoryAxonLayer2ApicalDendriteSeeded19	23	0	0	1
inhibitoryAxonLayer2ApicalDendriteSeeded20	18	0	0	1
inhibitoryAxonLayer2ApicalDendriteSeeded21	14	0	0	1
inhibitoryAxonLayer2ApicalDendriteSeeded01	9	0	0	1
inhibitoryAxonLayer2ApicalDendriteSeeded02	20	0	0	1
inhibitoryAxonLayer2ApicalDendriteSeeded03	17	0	0	1
inhibitoryAxonLayer2ApicalDendriteSeeded04	33	0	0	1
inhibitoryAxonLayer2ApicalDendriteSeeded05	12	0	0	1
inhibitoryAxonLayer2ApicalDendriteSeeded06	17	0	0	1
inhibitoryAxonLayer2ApicalDendriteSeeded07	11	0	0	1
inhibitoryAxonLayer2ApicalDendriteSeeded08	15	4	0.210526	0.789474
inhibitoryAxonLayer2ApicalDendriteSeeded09	6	0	0	1
inhibitoryAxonLayer2ApicalDendriteSeeded10	15	0	0	1
inhibitoryAxonLayer2ApicalDendriteSeeded11	26	1	0.037037	0.962963
inhibitoryAxonLayer2ApicalDendriteSeeded12	30	2	0.0625	0.9375
inhibitoryAxonLayer2ApicalDendriteSeeded13	8	1	0.111111	0.888889
inhibitoryAxonLayer2ApicalDendriteSeeded14	28	1	0.0344828	0.965517
inhibitoryAxonLayer2ApicalDendriteSeeded15	10	1	0.0909091	0.909091
inhibitoryAxonLayer2ApicalDendriteSeeded16	20	0	0	1
inhibitoryAxonLayer2ApicalDendriteSeeded17	7	0	0	1
inhibitoryAxonLayer2ApicalDendriteSeeded18	9	0	0	1
inhibitoryAxonLayer2ApicalDendriteSeeded19	8	0	0	1
inhibitoryAxonLayer2ApicalDendriteSeeded20	26	0	0	1
inhibitoryAxonLayer2ApicalDendriteSeeded01	6	0	0	1
inhibitoryAxonLayer2ApicalDendriteSeeded02	34	0	0	1
inhibitoryAxonLayer2ApicalDendriteSeeded03	7	0	0	1
inhibitoryAxonLayer2ApicalDendriteSeeded04	23	0	0	1
inhibitoryAxonLayer2ApicalDendriteSeeded05	33	1	0.0294118	0.970588
inhibitoryAxonLayer2ApicalDendriteSeeded06	19	0	0	1
inhibitoryAxonLayer2ApicalDendriteSeeded07	19	0	0	1
inhibitoryAxonLayer2ApicalDendriteSeeded08	44	0	0	1
inhibitoryAxonLayer2ApicalDendriteSeeded09	116	1	0.00854701	0.991453
inhibitoryAxonLayer2ApicalDendriteSeeded10	30	5	0.142857	0.857143
inhibitoryAxonLayer2ApicalDendriteSeeded11	49	1	0.02	0.98
inhibitoryAxonLayer2ApicalDendriteSeeded12	19	0	0	1
inhibitoryAxonLayer2ApicalDendriteSeeded13	8	0	0	1
inhibitoryAxonLayer2ApicalDendriteSeeded14	42	0	0	1
inhibitoryAxonLayer2ApicalDendriteSeeded15	16	0	0	1
inhibitoryAxonLayer2ApicalDendriteSeeded16	44	1	0.0222222	0.977778
inhibitoryAxonLayer2ApicalDendriteSeeded17	34	0	0	1
inhibitoryAxonLayer2ApicalDendriteSeeded18	23	0	0	1
inhibitoryAxonLayer2ApicalDendriteSeeded19	11	0	0	1
inhibitoryAxonLayer2ApicalDendriteSeeded20	16	0	0	1
inhibitoryAxonLayer2ApicalDendriteSeeded21	30	0	0	1
inhibitoryAxonLayer2ApicalDendriteSeeded01	28	0	0	1
inhibitoryAxonLayer2ApicalDendriteSeeded02	16	0	0	1
inhibitoryAxonLayer2ApicalDendriteSeeded03	40	3	0.0697674	0.930233
inhibitoryAxonLayer2ApicalDendriteSeeded04	27	0	0	1
inhibitoryAxonLayer2ApicalDendriteSeeded05	29	0	0	1
inhibitoryAxonLayer2ApicalDendriteSeeded06	32	0	0	1
inhibitoryAxonLayer2ApicalDendriteSeeded07	26	0	0	1
inhibitoryAxonLayer2ApicalDendriteSeeded08	9	0	0	1
inhibitoryAxonLayer2ApicalDendriteSeeded09	39	0	0	1
inhibitoryAxonLayer2ApicalDendriteSeeded10	8	0	0	1
inhibitoryAxonLayer2ApicalDendriteSeeded11	17	1	0.0555556	0.944444
inhibitoryAxonLayer2ApicalDendriteSeeded12	35	2	0.0540541	0.945946
inhibitoryAxonLayer2ApicalDendriteSeeded13	37	1	0.0263158	0.973684
inhibitoryAxonLayer2ApicalDendriteSeeded14	36	0	0	1
inhibitoryAxonLayer2ApicalDendriteSeeded15	14	0	0	1
inhibitoryAxonLayer2ApicalDendriteSeeded16	13	0	0	1
inhibitoryAxonLayer2ApicalDendriteSeeded17	9	0	0	1
inhibitoryAxonLayer2ApicalDendriteSeeded18	12	1	0.0769231	0.923077
inhibitoryAxonLayer2ApicalDendriteSeeded19	44	2	0.0434783	0.956522
inhibitoryAxonLayer2ApicalDendriteSeeded20	20	1	0.047619	0.952381
inhibitoryAxonLayer2ApicalDendriteSeeded21	25	0	0	1
inhibitoryAxonLayer2ApicalDendriteSeeded22	12	0	0	1
inhibitoryAxonLayer2ApicalDendriteSeeded23	33	2	0.0571429	0.942857
inhibitoryAxonLayer2ApicalDendriteSeeded24	22	0	0	1
inhibitoryAxonLayer2ApicalDendriteSeeded25	22	1	0.0434783	0.956522
inhibitoryAxonLayer2ApicalDendriteSeeded26	11	1	0.0833333	0.916667
inhibitoryAxonLayer2ApicalDendriteSeeded27	49	1	0.02	0.98
inhibitoryAxonLayer2ApicalDendriteSeeded28	34	2	0.0555556	0.944444
inhibitoryAxonLayer2ApicalDendriteSeeded29	14	0	0	1
inhibitoryAxonLayer2ApicalDendriteSeeded30	12	0	0	1
treeIndex	Spine	Shaft	SpineRatio	ShaftRatio		Axon Info.
axon01	0	6	0	1		Region	AD seed type
axon02	0	7	0	1		L2	Shaft of L5st AD
axon03	5	1	0.833333	0.166667
axon04	5	1	0.833333	0.166667
axon05	4	2	0.666667	0.333333
axon06	0	6	0	1
axon07	9	8	0.529412	0.470588
axon08	0	6	0	1
axon09	0	6	0	1
treeIndex	Spine	Shaft	SpineRatio	ShaftRatio		Axon Info.
deepLayerApicalDendriteSeeded01	8	4	0.666667	0.333333		Region	AD seed type
deepLayerApicalDendriteSeeded02	5	1	0.833333	0.166667		L2	Spine of DL AD
deepLayerApicalDendriteSeeded03	5	1	0.833333	0.166667
deepLayerApicalDendriteSeeded04	8	0	1	0
deepLayerApicalDendriteSeeded05	5	1	0.833333	0.166667
deepLayerApicalDendriteSeeded06	6	7	0.461538	0.538462
deepLayerApicalDendriteSeeded07	6	0	1	0
deepLayerApicalDendriteSeeded08	5	1	0.833333	0.166667
deepLayerApicalDendriteSeeded09	7	0	1	0
deepLayerApicalDendriteSeeded10	3	0	1	0
deepLayerApicalDendriteSeeded11	6	0	1	0
deepLayerApicalDendriteSeeded12	5	1	0.833333	0.166667
deepLayerApicalDendriteSeeded13	7	1	0.875	0.125
deepLayerApicalDendriteSeeded14	6	0	1	0
deepLayerApicalDendriteSeeded15	7	0	1	0
deepLayerApicalDendriteSeeded16	6	0	1	0
deepLayerApicalDendriteSeeded17	6	0	1	0
deepLayerApicalDendriteSeeded18	6	0	1	0
deepLayerApicalDendriteSeeded19	6	0	1	0
deepLayerApicalDendriteSeeded01	5	1	0.833333	0.166667
deepLayerApicalDendriteSeeded02	8	7	0.533333	0.466667
deepLayerApicalDendriteSeeded03	11	3	0.785714	0.214286
deepLayerApicalDendriteSeeded04	6	0	1	0
deepLayerApicalDendriteSeeded05	6	0	1	0
deepLayerApicalDendriteSeeded06	4	0	1	0
deepLayerApicalDendriteSeeded07	7	0	1	0
deepLayerApicalDendriteSeeded08	6	0	1	0
deepLayerApicalDendriteSeeded09	6	0	1	0
deepLayerApicalDendriteSeeded10	5	0	1	0
deepLayerApicalDendriteSeeded11	5	1	0.833333	0.166667
deepLayerApicalDendriteSeeded12	5	1	0.833333	0.166667
deepLayerApicalDendriteSeeded13	5	0	1	0
deepLayerApicalDendriteSeeded14	5	0	1	0
deepLayerApicalDendriteSeeded15	5	0	1	0
deepLayerApicalDendriteSeeded16	6	1	0.857143	0.142857
deepLayerApicalDendriteSeeded17	7	4	0.636364	0.363636
deepLayerApicalDendriteSeeded18	4	0	1	0
deepLayerApicalDendriteSeeded19	4	1	0.8	0.2
deepLayerApicalDendriteSeeded20	4	1	0.8	0.2
deepLayerApicalDendriteSeeded21	4	1	0.8	0.2
deepLayerApicalDendriteSeeded22	5	0	1	0
deepLayerApicalDendriteSeeded23	6	0	1	0
deepLayerApicalDendriteSeeded24	4	0	1	0
deepLayerApicalDendriteSeeded25	4	1	0.8	0.2
deepLayerApicalDendriteSeeded26	4	1	0.8	0.2
deepLayerApicalDendriteSeeded27	10	1	0.909091	0.0909091
deepLayerApicalDendriteSeeded28	54	8	0.870968	0.129032
deepLayerApicalDendriteSeeded29	11	1	0.916667	0.0833333
deepLayerApicalDendriteSeeded30	16	1	0.941176	0.0588235
deepLayerApicalDendriteSeeded31	14	2	0.875	0.125
deepLayerApicalDendriteSeeded32	7	1	0.875	0.125
deepLayerApicalDendriteSeeded01	2	0	1	0
deepLayerApicalDendriteSeeded02	6	0	1	0
deepLayerApicalDendriteSeeded03	6	0	1	0
deepLayerApicalDendriteSeeded04	6	0	1	0
deepLayerApicalDendriteSeeded05	6	0	1	0
deepLayerApicalDendriteSeeded06	6	0	1	0
deepLayerApicalDendriteSeeded07	7	0	1	0
deepLayerApicalDendriteSeeded08	6	4	0.6	0.4
deepLayerApicalDendriteSeeded09	5	0	1	0
deepLayerApicalDendriteSeeded10	7	0	1	0
treeIndex	Spine	Shaft	SpineRatio	ShaftRatio		Axon Info.
layer2ApicalDendriteSeeded01	4	1	0.8	0.2		Region	AD seed type
layer2ApicalDendriteSeeded02	6	0	1	0		L2	Spine of L2 AD
layer2ApicalDendriteSeeded03	6	0	1	0
layer2ApicalDendriteSeeded04	6	0	1	0
layer2ApicalDendriteSeeded05	6	0	1	0
layer2ApicalDendriteSeeded06	5	1	0.833333	0.166667
layer2ApicalDendriteSeeded07	5	0	1	0
layer2ApicalDendriteSeeded08	6	0	1	0
layer2ApicalDendriteSeeded09	6	1	0.857143	0.142857
layer2ApicalDendriteSeeded10	6	0	1	0
layer2ApicalDendriteSeeded01	2	3	0.4	0.6
layer2ApicalDendriteSeeded02	6	1	0.857143	0.142857
layer2ApicalDendriteSeeded03	4	1	0.8	0.2
layer2ApicalDendriteSeeded04	4	1	0.8	0.2
layer2ApicalDendriteSeeded05	10	2	0.833333	0.166667
layer2ApicalDendriteSeeded06	6	0	1	0
layer2ApicalDendriteSeeded07	6	0	1	0
layer2ApicalDendriteSeeded08	6	0	1	0
layer2ApicalDendriteSeeded09	6	0	1	0
layer2ApicalDendriteSeeded10	5	1	0.833333	0.166667
layer2ApicalDendriteSeeded11	5	1	0.833333	0.166667
layer2ApicalDendriteSeeded12	6	0	1	0
layer2ApicalDendriteSeeded13	7	1	0.875	0.125
layer2ApicalDendriteSeeded14	6	0	1	0
layer2ApicalDendriteSeeded15	6	1	0.857143	0.142857
layer2ApicalDendriteSeeded16	5	1	0.833333	0.166667
layer2ApicalDendriteSeeded17	6	0	1	0
layer2ApicalDendriteSeeded18	7	0	1	0
layer2ApicalDendriteSeeded19	6	0	1	0
layer2ApicalDendriteSeeded20	6	0	1	0
layer2ApicalDendriteSeeded21	20	1	0.952381	0.047619
layer2ApicalDendriteSeeded22	17	3	0.85	0.15
layer2ApicalDendriteSeeded23	14	3	0.823529	0.176471
layer2ApicalDendriteSeeded24	5	1	0.833333	0.166667
layer2ApicalDendriteSeeded25	9	0	1	0
