# Supplementary figures and images for: Cell-type specific innervation of cortical pyramidal cells at their apical dendrites
Source: eLife journal article supplement (doi:10.7554/elife.46876), 2020-02-28

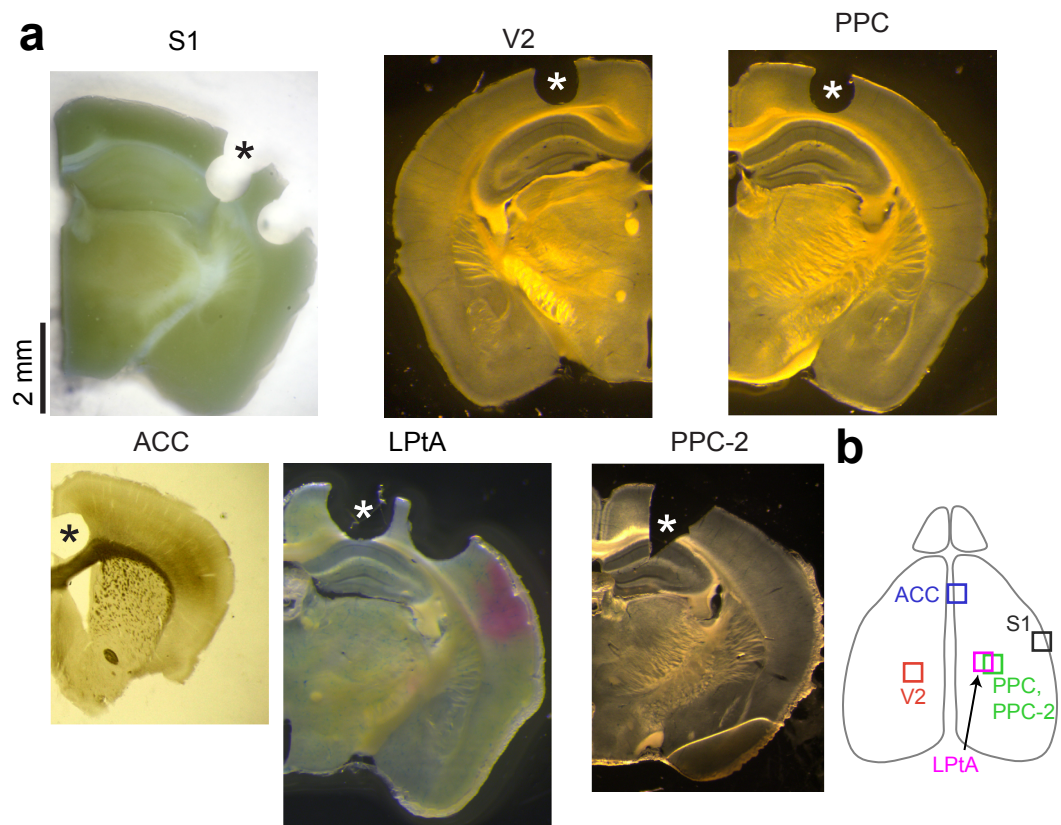

Fig. 1 - Fig. Suppl. 1  
Karimi, Odenthal et al.

Supplement: supp [file elife-46876-supp-v1.zip]

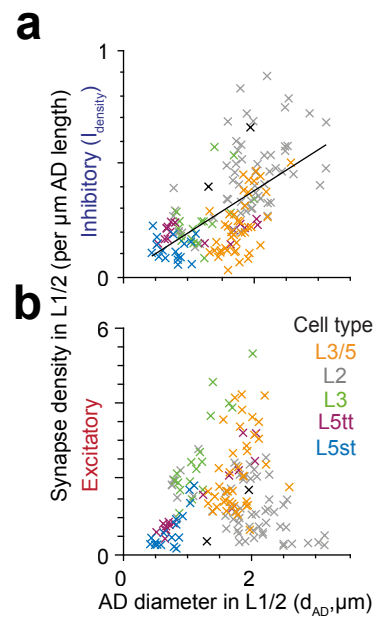

Fig. 2 - Fig. Suppl. 1  
Karimi, Odenthal et al.

Supplement: supp [file elife-46876-supp-v1.zip]

**a**

Pyramidal cells in PPC cortex (PPC-2 dataset):

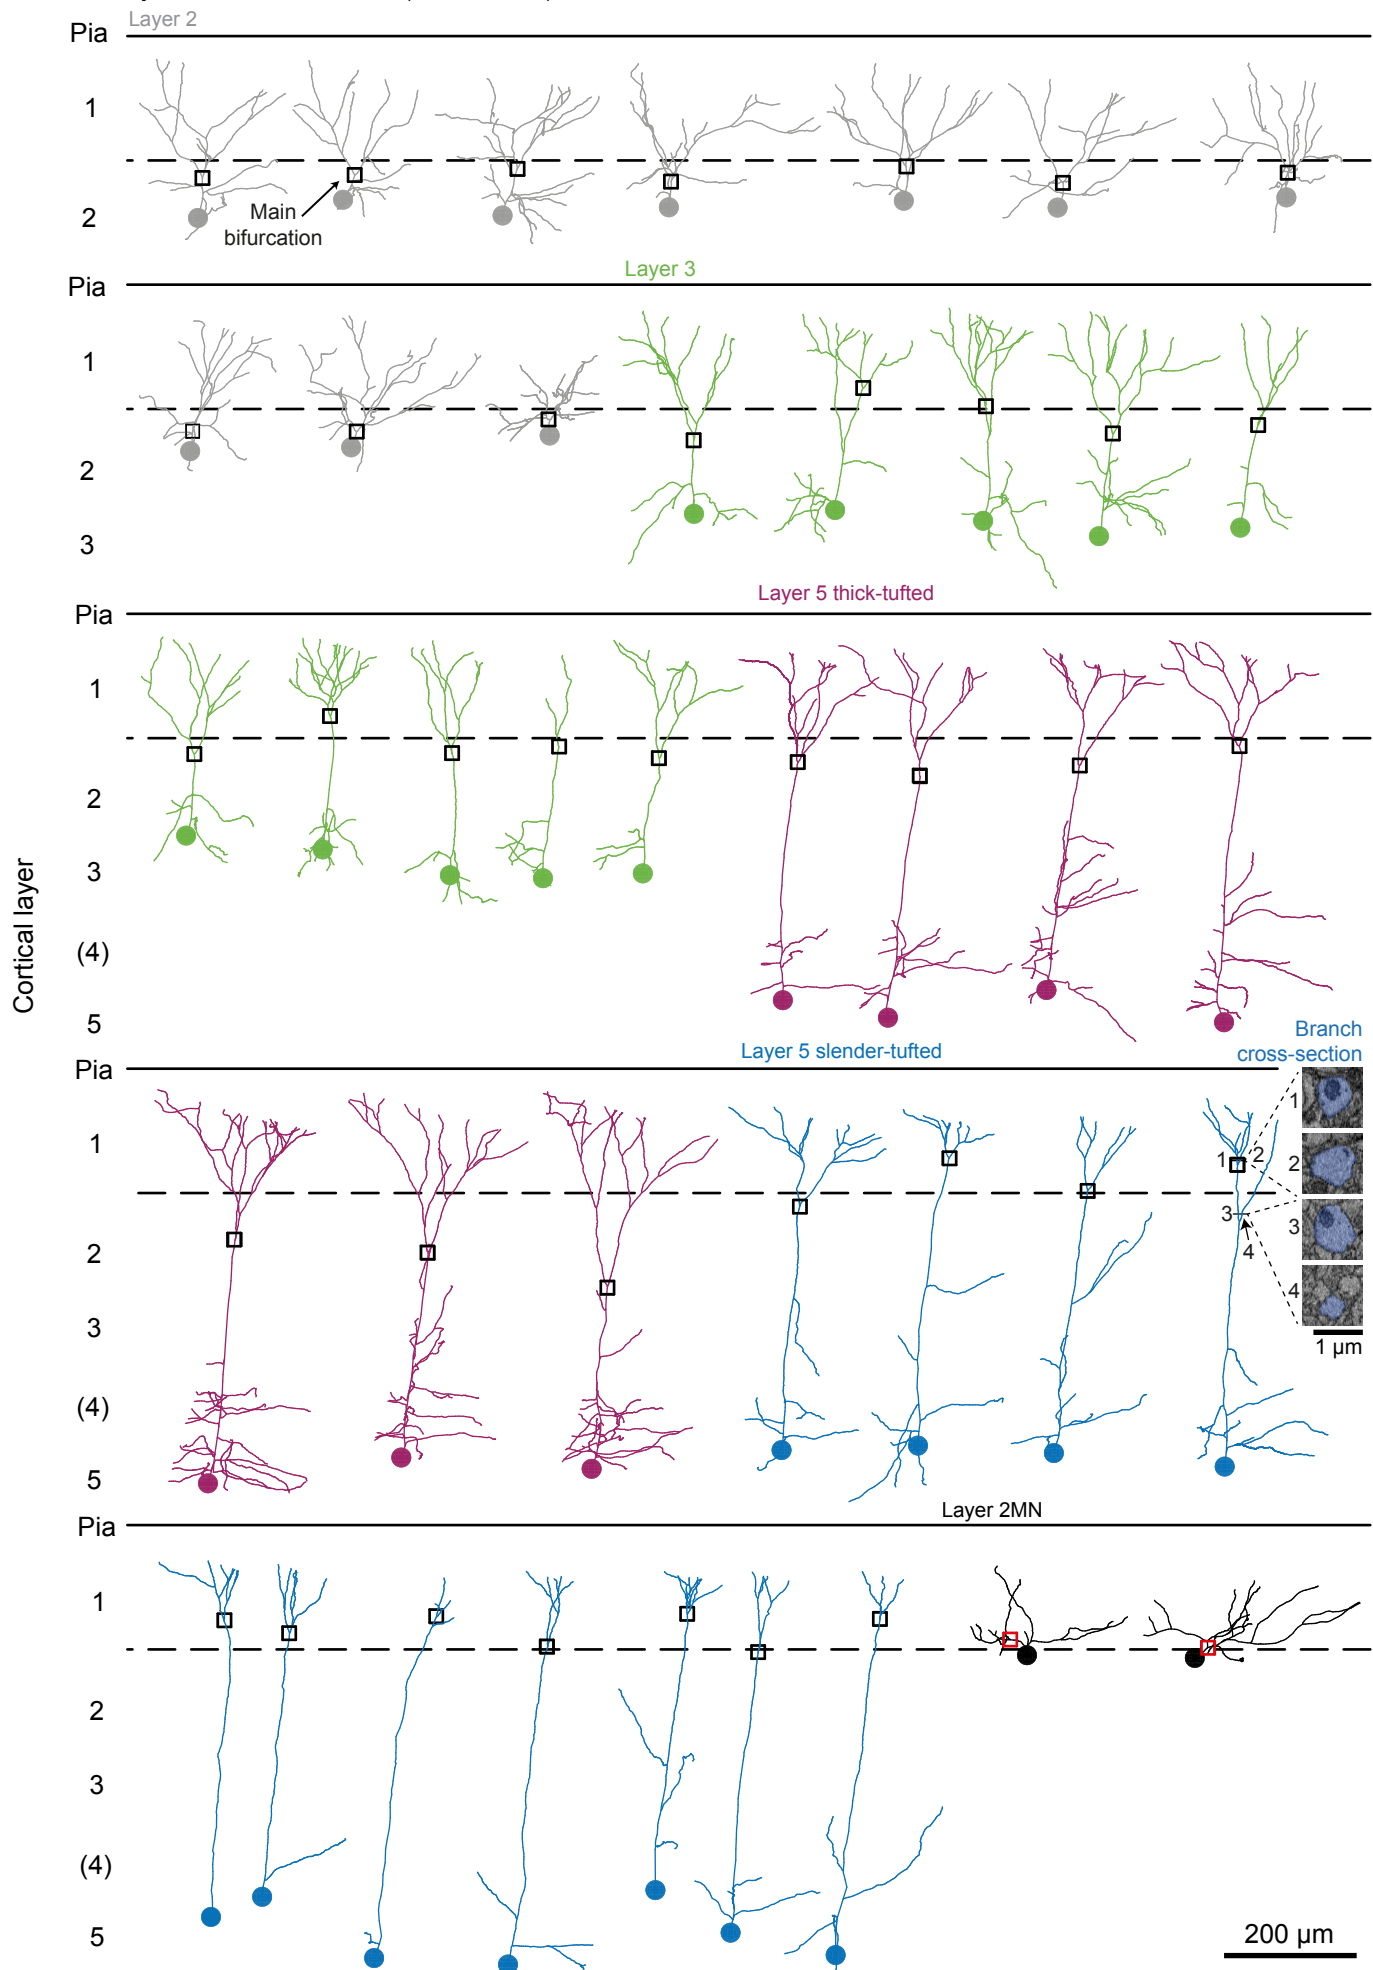

**b**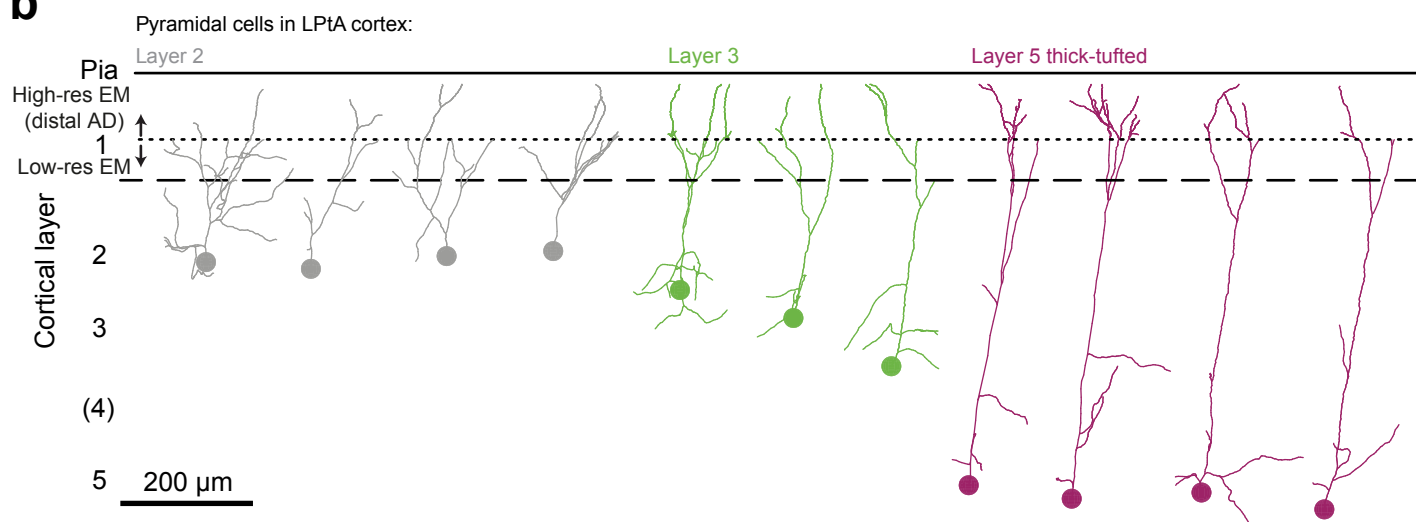

Fig. 5 - Fig. Suppl. 1  
Karimi, Odenthal et al.

Supplement: supp [file elife-46876-supp-v1.zip]
